# Supplementary material for: Analysis of the Endogenous Peptidomes of Different Infant Formula Types and Human Milk
Source: MDPI journal article supplement (doi:10.3390/foods10112579), 2021-10-26
Supplement: s1 [file s1]

## Supplementary Material

### Analysis of the endogenous peptidomes of different infant formula types and human milk

Michele Wölk<sup>a,b</sup>, Corinna Gebauer<sup>c</sup>, Ralf Hoffmann<sup>a,b\*</sup> and Sanja Milkovska-Stamenova<sup>a,b\*</sup>

<sup>a</sup> Institute of Bioanalytical Chemistry, Faculty of Chemistry and Mineralogy, Universität Leipzig, Deutscher Platz 5, 04103, Leipzig, Germany

<sup>b</sup> Center for Biotechnology and Biomedicine, Universität Leipzig, Deutscher Platz 5, 04103, Leipzig, Germany

<sup>c</sup> Department of Paediatrics, Division of Neonatology, University of Leipzig Medical Center, Liebigstr. 20 a, 04103 Leipzig, Germany

|                                                                                                        |   |
|--------------------------------------------------------------------------------------------------------|---|
| <b>Figure S1:</b> Sequence coverage of $\beta$ -casein in goat milk-based IF.....                      | 2 |
| <b>Figure S2:</b> Sequence coverage of $\beta$ -casein in cow milk-based IF.....                       | 3 |
| <b>Figure S3:</b> Sequence coverage of $\beta$ -casein in human milk.....                              | 4 |
| <b>Figure S4:</b> Sequence logo cleavage sites of $\beta$ -casein .....                                | 5 |
| <b>Figure S5:</b> Distribution of the peptide length in $\beta$ -casein and $\alpha_{S1}$ -casein..... | 6 |

Signal Peptide

|       |   |   |   |   |   |   |   |   |   |    |    |    |    |    |    |    |    |    |    |    |    |    |    |    |    |    |    |    |    |    |
|-------|---|---|---|---|---|---|---|---|---|----|----|----|----|----|----|----|----|----|----|----|----|----|----|----|----|----|----|----|----|----|
| Pos   | 1 | 2 | 3 | 4 | 5 | 6 | 7 | 8 | 9 | 10 | 11 | 12 | 13 | 14 | 15 | 16 | 17 | 18 | 19 | 20 | 21 | 22 | 23 | 24 | 25 | 26 | 27 | 28 | 29 | 30 |
| AA    | M | K | V | L | I | L | A | C | L | V  | A  | L  | A  | I  | A  | R  | E  | Q  | E  | E  | L  | N  | V  | V  | G  | E  | T  | V  | E  | S  |
| Total |   |   |   |   |   |   |   |   |   |    |    |    |    |    |    | 10 | 11 | 11 | 11 | 11 | 11 | 11 | 11 | 10 | 8  | 7  | 6  | 5  | 5  | 4  |
| G1    |   |   |   |   |   |   |   |   |   |    |    |    |    |    |    | 9  | 10 | 10 | 10 | 10 | 10 | 10 | 10 | 9  | 7  | 6  | 5  | 4  | 4  | 3  |
| G2    |   |   |   |   |   |   |   |   |   |    |    |    |    |    |    | 10 | 11 | 11 | 11 | 11 | 11 | 11 | 11 | 10 | 8  | 7  | 6  | 5  | 5  | 4  |

|       |    |    |    |    |    |    |    |    |    |    |    |    |    |    |    |    |    |    |    |    |    |    |    |    |    |    |    |    |    |    |
|-------|----|----|----|----|----|----|----|----|----|----|----|----|----|----|----|----|----|----|----|----|----|----|----|----|----|----|----|----|----|----|
| Pos   | 31 | 32 | 33 | 34 | 35 | 36 | 37 | 38 | 39 | 40 | 41 | 42 | 43 | 44 | 45 | 46 | 47 | 48 | 49 | 50 | 51 | 52 | 53 | 54 | 55 | 56 | 57 | 58 | 59 | 60 |
| AA    | L  | S  | S  | S  | E  | E  | S  | I  | T  | H  | I  | N  | K  | K  | I  | E  | K  | F  | Q  | S  | E  | E  | Q  | Q  | Q  | T  | E  | D  | E  | L  |
| Total | 4  | 4  | 4  | 5  | 5  | 5  | 5  | 5  | 5  | 5  | 5  | 5  | 5  | 7  | 9  | 9  | 11 | 13 | 13 | 13 | 13 | 13 | 13 | 13 | 13 | 13 | 14 | 13 | 13 | 13 |
| G1    | 3  | 3  | 3  | 4  | 4  | 4  | 4  | 4  | 4  | 4  | 4  | 4  | 4  | 5  | 7  | 9  | 11 | 13 | 13 | 13 | 13 | 13 | 13 | 13 | 13 | 13 | 13 | 12 | 12 | 12 |
| G2    | 4  | 4  | 4  | 5  | 5  | 5  | 5  | 5  | 5  | 5  | 5  | 5  | 5  | 6  | 8  | 8  | 10 | 12 | 12 | 12 | 12 | 12 | 12 | 12 | 12 | 12 | 13 | 12 | 12 | 12 |

|       |    |    |    |    |    |    |    |    |    |    |    |    |    |    |    |    |    |    |    |    |    |    |    |    |    |    |    |    |    |    |
|-------|----|----|----|----|----|----|----|----|----|----|----|----|----|----|----|----|----|----|----|----|----|----|----|----|----|----|----|----|----|----|
| Pos   | 61 | 62 | 63 | 64 | 65 | 66 | 67 | 68 | 69 | 70 | 71 | 72 | 73 | 74 | 75 | 76 | 77 | 78 | 79 | 80 | 81 | 82 | 83 | 84 | 85 | 86 | 87 | 88 | 89 | 90 |
| AA    | Q  | D  | K  | I  | H  | P  | F  | A  | Q  | A  | Q  | S  | L  | V  | Y  | P  | F  | T  | G  | P  | I  | P  | N  | S  | L  | P  | Q  | N  | I  | L  |
| Total | 13 | 13 | 13 | 5  | 5  | 4  | 3  | 2  | 2  | 1  |    |    |    |    |    |    |    |    |    |    |    |    |    |    |    |    |    |    |    |    |
| G1    | 12 | 12 | 12 | 4  | 4  | 3  | 3  | 2  | 2  | 1  |    |    |    |    |    |    |    |    |    |    |    |    |    |    |    |    |    |    |    |    |
| G2    | 12 | 12 | 12 | 4  | 4  | 4  | 3  | 2  | 2  | 1  |    |    |    |    |    |    |    |    |    |    |    |    |    |    |    |    |    |    |    |    |

|       |    |    |    |    |    |    |    |    |    |     |     |     |     |     |     |     |     |     |     |     |     |     |     |     |     |     |     |     |     |     |
|-------|----|----|----|----|----|----|----|----|----|-----|-----|-----|-----|-----|-----|-----|-----|-----|-----|-----|-----|-----|-----|-----|-----|-----|-----|-----|-----|-----|
| Pos   | 91 | 92 | 93 | 94 | 95 | 96 | 97 | 98 | 99 | 100 | 101 | 102 | 103 | 104 | 105 | 106 | 107 | 108 | 109 | 110 | 111 | 112 | 113 | 114 | 115 | 116 | 117 | 118 | 119 | 120 |
| AA    | P  | L  | T  | Q  | T  | P  | V  | V  | V  | P   | P   | F   | L   | Q   | P   | E   | I   | M   | G   | V   | P   | K   | V   | K   | E   | T   | M   | V   | P   | K   |
| Total |    | 3  | 4  | 4  | 4  | 4  | 4  | 12 | 13 | 13  | 13  | 13  | 13  | 13  | 13  | 13  | 13  | 13  | 14  | 14  | 14  | 14  | 12  | 12  | 12  | 12  | 10  | 10  | 10  | 10  |
| G1    |    | 3  | 4  | 4  | 4  | 4  | 4  | 11 | 12 | 12  | 12  | 12  | 12  | 12  | 12  | 12  | 12  | 12  | 13  | 13  | 13  | 13  | 13  | 13  | 11  | 10  | 8   | 8   | 8   | 8   |
| G2    |    | 3  | 4  | 4  | 4  | 4  | 4  | 11 | 12 | 12  | 12  | 12  | 12  | 12  | 12  | 12  | 12  | 12  | 13  | 13  | 13  | 13  | 13  | 13  | 11  | 11  | 12  | 10  | 10  | 10  |

|       |     |     |     |     |     |     |     |     |     |     |     |     |     |     |     |     |     |     |     |     |     |     |     |     |     |     |     |     |     |     |
|-------|-----|-----|-----|-----|-----|-----|-----|-----|-----|-----|-----|-----|-----|-----|-----|-----|-----|-----|-----|-----|-----|-----|-----|-----|-----|-----|-----|-----|-----|-----|
| Pos   | 121 | 122 | 123 | 124 | 125 | 126 | 127 | 128 | 129 | 130 | 131 | 132 | 133 | 134 | 135 | 136 | 137 | 138 | 139 | 140 | 141 | 142 | 143 | 144 | 145 | 146 | 147 | 148 | 149 | 150 |
| AA    | H   | K   | E   | M   | P   | F   | P   | K   | Y   | P   | V   | E   | P   | F   | T   | E   | S   | Q   | S   | L   | T   | L   | T   | D   | V   | E   | K   | L   | H   | L   |
| Total | 7   | 7   | 9   | 9   | 9   | 9   | 9   | 9   | 4   | 4   | 4   | 4   | 4   | 4   | 4   | 4   | 4   | 4   | 4   | 4   | 4   | 5   | 5   | 5   | 5   | 5   | 5   | 4   | 4   | 4   |
| G1    | 4   | 4   | 4   | 4   | 4   | 4   | 4   | 4   |     |     |     |     |     |     |     |     |     |     |     |     |     |     |     |     |     |     |     |     |     |     |
| G2    | 7   | 7   | 9   | 9   | 9   | 9   | 9   | 9   | 4   | 4   | 4   | 4   | 4   | 4   | 4   | 4   | 4   | 4   | 4   | 4   | 4   | 5   | 5   | 5   | 5   | 5   | 5   | 4   | 4   | 4   |

|       |     |     |     |     |     |     |     |     |     |     |     |     |     |     |     |     |     |     |     |     |     |     |     |     |     |     |     |     |     |     |
|-------|-----|-----|-----|-----|-----|-----|-----|-----|-----|-----|-----|-----|-----|-----|-----|-----|-----|-----|-----|-----|-----|-----|-----|-----|-----|-----|-----|-----|-----|-----|
| Pos   | 151 | 152 | 153 | 154 | 155 | 156 | 157 | 158 | 159 | 160 | 161 | 162 | 163 | 164 | 165 | 166 | 167 | 168 | 169 | 170 | 171 | 172 | 173 | 174 | 175 | 176 | 177 | 178 | 179 | 180 |
| AA    | P   | L   | P   | L   | V   | Q   | S   | W   | M   | H   | Q   | P   | P   | Q   | P   | L   | S   | P   | T   | V   | M   | F   | P   | P   | Q   | S   | V   | L   | S   | L   |
| Total | 4   | 4   | 4   | 1   | 1   | 1   | 1   | 2   | 1   | 1   | 1   | 1   | 1   | 1   | 1   | 1   | 1   | 1   | 1   |     |     |     |     |     |     |     | 2   | 9   | 10  |     |
| G1    |     |     |     |     |     |     |     | 1   | 1   | 1   | 1   | 1   | 1   | 1   | 1   | 1   | 1   | 1   | 1   |     |     |     |     |     |     |     | 2   | 9   | 10  |     |
| G2    | 4   | 4   | 4   | 1   | 1   | 1   | 1   | 1   | 1   | 1   | 1   | 1   | 1   | 1   | 1   | 1   | 1   | 1   | 1   |     |     |     |     |     |     |     | 1   | 3   | 3   |     |

|       |     |     |     |     |     |     |     |     |     |     |     |     |     |     |     |     |     |     |     |     |     |     |     |     |     |     |     |     |     |     |
|-------|-----|-----|-----|-----|-----|-----|-----|-----|-----|-----|-----|-----|-----|-----|-----|-----|-----|-----|-----|-----|-----|-----|-----|-----|-----|-----|-----|-----|-----|-----|
| Pos   | 181 | 182 | 183 | 184 | 185 | 186 | 187 | 188 | 189 | 190 | 191 | 192 | 193 | 194 | 195 | 196 | 197 | 198 | 199 | 200 | 201 | 202 | 203 | 204 | 205 | 206 | 207 | 208 | 209 | 210 |
| AA    | S   | Q   | P   | K   | V   | L   | P   | V   | P   | Q   | K   | A   | V   | P   | Q   | R   | D   | M   | P   | I   | Q   | A   | F   | L   | L   | Y   | Q   | E   | P   | V   |
| Total | 12  | 12  | 12  | 12  | 29  | 30  | 30  | 30  | 30  | 30  | 29  | 38  | 38  | 38  | 39  | 37  | 37  | 36  | 36  | 35  | 35  | 29  | 27  | 24  | 24  | 29  | 31  | 34  | 37  | 41  |
| G1    | 12  | 12  | 12  | 12  | 26  | 27  | 27  | 27  | 27  | 27  | 26  | 34  | 34  | 34  | 35  | 33  | 33  | 32  | 32  | 31  | 31  | 25  | 23  | 20  | 20  | 25  | 27  | 30  | 33  | 37  |
| G2    | 4   | 4   | 4   | 4   | 20  | 20  | 20  | 20  | 20  | 20  | 20  | 28  | 28  | 28  | 28  | 28  | 28  | 27  | 27  | 26  | 26  | 22  | 20  | 21  | 22  | 26  | 28  | 31  | 33  | 37  |

|       |     |     |     |     |     |     |     |     |     |     |     |     |
|-------|-----|-----|-----|-----|-----|-----|-----|-----|-----|-----|-----|-----|
| Pos   | 211 | 212 | 213 | 214 | 215 | 216 | 217 | 218 | 219 | 220 | 221 | 222 |
| AA    | L   | G   | P   | V   | R   | G   | P   | F   | P   | I   | L   | V   |
| Total | 43  | 46  | 48  | 49  | 49  | 48  | 48  | 47  | 47  | 44  | 31  | 16  |
| G1    | 39  | 42  | 44  | 45  | 45  | 44  | 44  | 43  | 43  | 40  | 27  | 13  |
| G2    | 39  | 42  | 43  | 44  | 44  | 43  | 43  | 43  | 43  | 41  | 29  | 16  |

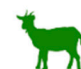

**Figure S1:** Sequence coverage of  $\beta$  casein (86.0 % excluding the signal peptide) derived from all peptides identified in goat milk-based IF (total) and the individual brands G1 and G2.

| Signal Peptide |   |   |   |   |   |   |   |   |   |    |    |    |    |    |    |    |    |    |    |    |    |    |    |    |    |    |    |    |    |    |   |   |   |   |   |  |
|----------------|---|---|---|---|---|---|---|---|---|----|----|----|----|----|----|----|----|----|----|----|----|----|----|----|----|----|----|----|----|----|---|---|---|---|---|--|
| Pos            | 1 | 2 | 3 | 4 | 5 | 6 | 7 | 8 | 9 | 10 | 11 | 12 | 13 | 14 | 15 | 16 | 17 | 18 | 19 | 20 | 21 | 22 | 23 | 24 | 25 | 26 | 27 | 28 | 29 | 30 |   |   |   |   |   |  |
| AA             | M | K | V | L | I | L | A | C | L | V  | A  | L  | A  | L  | A  | R  | E  | L  | E  | E  | L  | N  | V  | P  | G  | E  | I  | V  | E  | S  |   |   |   |   |   |  |
| Total          | 4 | 4 | 4 | 4 | 4 | 4 | 4 | 4 | 4 | 4  | 4  | 4  | 4  | 4  | 4  | 4  | 4  | 4  | 4  | 4  | 4  | 4  | 4  | 4  | 4  | 4  | 4  | 4  | 4  | 4  | 4 | 4 | 4 | 4 | 4 |  |
| P1             | 4 | 4 | 4 | 4 | 4 | 4 | 4 | 4 | 4 | 4  | 4  | 4  | 4  | 4  | 4  | 4  | 4  | 4  | 4  | 4  | 4  | 4  | 4  | 4  | 4  | 4  | 3  | 3  | 3  | 3  |   |   |   |   |   |  |
| P2             | 4 | 4 | 4 | 4 | 4 | 4 | 4 | 4 | 4 | 4  | 4  | 4  | 4  | 4  | 4  | 4  | 4  | 4  | 4  | 4  | 4  | 4  | 4  | 4  | 4  | 4  | 3  | 3  | 3  | 3  |   |   |   |   |   |  |
| L1             | 4 | 4 | 4 | 4 | 4 | 4 | 4 | 4 | 4 | 4  | 4  | 4  | 4  | 4  | 4  | 4  | 4  | 4  | 4  | 4  | 4  | 4  | 4  | 4  | 4  | 4  | 4  | 4  | 4  | 4  | 4 | 4 | 4 | 4 | 4 |  |
| L2             | 4 | 4 | 4 | 4 | 4 | 4 | 4 | 4 | 4 | 4  | 4  | 4  | 4  | 4  | 4  | 4  | 4  | 4  | 4  | 4  | 4  | 4  | 4  | 4  | 4  | 4  | 4  | 4  | 4  | 4  | 4 | 4 | 4 | 4 | 4 |  |

| Pos   | 31 | 32 | 33 | 34 | 35 | 36 | 37 | 38 | 39 | 40 | 41 | 42 | 43 | 44 | 45 | 46 | 47 | 48 | 49 | 50 | 51 | 52 | 53 | 54 | 55 | 56 | 57 | 58 | 59 | 60 |  |  |  |  |  |  |
|-------|----|----|----|----|----|----|----|----|----|----|----|----|----|----|----|----|----|----|----|----|----|----|----|----|----|----|----|----|----|----|--|--|--|--|--|--|
| AA    | L  | S  | S  | S  | E  | E  | S  | I  | T  | R  | I  | N  | K  | K  | I  | E  | K  | F  | Q  | S  | E  | E  | Q  | Q  | Q  | T  | E  | D  | E  | L  |  |  |  |  |  |  |
| Total | 5  | 8  | 9  | 14 | 15 | 16 | 16 | 16 | 16 | 16 | 16 | 16 | 13 | 23 | 28 | 28 | 29 | 31 | 31 | 31 | 31 | 31 | 31 | 31 | 31 | 30 | 30 | 30 | 29 | 29 |  |  |  |  |  |  |
| P1    | 3  | 6  | 7  | 9  | 10 | 10 | 10 | 10 | 10 | 10 | 10 | 11 | 11 | 8  | 18 | 21 | 22 | 24 | 24 | 24 | 24 | 24 | 24 | 24 | 23 | 22 | 22 | 22 | 21 | 21 |  |  |  |  |  |  |
| P2    | 3  | 3  | 4  | 6  | 7  | 7  | 7  | 7  | 7  | 7  | 7  | 8  | 8  | 6  | 16 | 19 | 20 | 22 | 22 | 22 | 22 | 22 | 22 | 22 | 21 | 19 | 19 | 19 | 19 |    |  |  |  |  |  |  |
| L1    | 4  | 5  | 6  | 9  | 10 | 10 | 10 | 10 | 10 | 10 | 11 | 11 | 10 | 21 | 26 | 26 | 27 | 29 | 29 | 29 | 29 | 29 | 29 | 29 | 28 | 27 | 27 | 27 | 27 |    |  |  |  |  |  |  |
| L2    | 5  | 6  | 7  | 12 | 13 | 14 | 14 | 14 | 14 | 14 | 14 | 14 | 12 | 23 | 28 | 28 | 29 | 31 | 31 | 31 | 31 | 31 | 31 | 31 | 31 | 30 | 29 | 29 | 28 | 28 |  |  |  |  |  |  |

| Pos   | 61 | 62 | 63 | 64 | 65 | 66 | 67 | 68 | 69 | 70 | 71 | 72 | 73 | 74 | 75 | 76 | 77 | 78 | 79 | 80 | 81 | 82 | 83 | 84 | 85 | 86 | 87 | 88 | 89 | 90 |  |  |  |  |  |  |
|-------|----|----|----|----|----|----|----|----|----|----|----|----|----|----|----|----|----|----|----|----|----|----|----|----|----|----|----|----|----|----|--|--|--|--|--|--|
| AA    | Q  | D  | K  | I  | H  | P  | F  | A  | Q  | T  | Q  | S  | L  | V  | Y  | P  | F  | P  | G  | P  | I  | P  | N  | S  | L  | P  | Q  | N  | I  | P  |  |  |  |  |  |  |
| Total | 29 | 30 | 30 | 24 | 24 | 23 | 22 | 18 | 13 | 12 | 10 | 6  |    |    |    |    |    |    |    |    |    |    |    |    |    |    |    | 1  | 1  | 1  |  |  |  |  |  |  |
| P1    | 21 | 22 | 22 | 16 | 16 | 15 | 15 | 11 | 9  | 8  | 7  | 3  |    |    |    |    |    |    |    |    |    |    |    |    |    |    |    | 1  | 1  | 1  |  |  |  |  |  |  |
| P2    | 19 | 20 | 20 | 14 | 14 | 13 | 12 | 9  | 8  | 8  | 7  | 3  |    |    |    |    |    |    |    |    |    |    |    |    |    |    |    | 1  | 1  | 1  |  |  |  |  |  |  |
| L1    | 27 | 27 | 27 | 21 | 21 | 20 | 19 | 17 | 12 | 11 | 9  | 6  |    |    |    |    |    |    |    |    |    |    |    |    |    |    |    |    |    |    |  |  |  |  |  |  |
| L2    | 28 | 28 | 28 | 22 | 22 | 21 | 20 | 17 | 12 | 11 | 9  | 6  |    |    |    |    |    |    |    |    |    |    |    |    |    |    |    |    |    |    |  |  |  |  |  |  |

| Pos   | 91 | 92 | 93 | 94 | 95 | 96 | 97 | 98 | 99 | 100 | 101 | 102 | 103 | 104 | 105 | 106 | 107 | 108 | 109 | 110 | 111 | 112 | 113 | 114 | 115 | 116 | 117 | 118 | 119 | 120 |  |  |  |  |  |  |
|-------|----|----|----|----|----|----|----|----|----|-----|-----|-----|-----|-----|-----|-----|-----|-----|-----|-----|-----|-----|-----|-----|-----|-----|-----|-----|-----|-----|--|--|--|--|--|--|
| AA    | P  | L  | T  | Q  | T  | P  | V  | V  | V  | P   | P   | F   | L   | Q   | P   | E   | V   | M   | G   | V   | S   | K   | V   | K   | E   | A   | M   | A   | P   | K   |  |  |  |  |  |  |
| Total | 1  | 1  | 1  | 1  | 1  | 1  | 1  | 1  | 1  | 3   | 3   | 3   | 3   | 3   | 3   | 4   | 5   | 7   | 8   | 8   | 8   | 8   | 9   | 9   | 9   | 9   | 11  | 11  | 11  | 10  |  |  |  |  |  |  |
| P1    | 1  | 1  | 1  | 1  | 1  | 1  | 1  | 1  | 1  | 3   | 3   | 3   | 3   | 3   | 3   | 3   | 4   | 4   | 4   | 4   | 3   | 3   | 4   | 4   | 4   | 4   | 4   | 4   | 4   | 4   |  |  |  |  |  |  |
| P2    | 1  | 1  | 1  | 1  | 1  | 1  | 1  | 1  | 1  | 3   | 3   | 3   | 3   | 3   | 3   | 3   | 4   | 4   | 4   | 5   | 5   | 3   | 3   | 4   | 4   | 4   | 4   | 4   | 4   | 4   |  |  |  |  |  |  |
| L1    |    |    |    |    |    |    |    |    |    | 2   | 2   | 2   | 2   | 2   | 2   | 2   | 3   | 4   | 5   | 5   | 5   | 5   | 5   | 5   | 5   | 5   | 7   | 7   | 7   |     |  |  |  |  |  |  |
| L2    | 1  | 1  | 1  | 1  | 1  | 1  | 1  | 1  | 2  | 2   | 2   | 2   | 2   | 2   | 2   | 3   | 4   | 6   | 7   | 7   | 7   | 7   | 8   | 8   | 8   | 8   | 8   | 8   | 8   |     |  |  |  |  |  |  |

| Pos   | 121 | 122 | 123 | 124 | 125 | 126 | 127 | 128 | 129 | 130 | 131 | 132 | 133 | 134 | 135 | 136 | 137 | 138 | 139 | 140 | 141 | 142 | 143 | 144 | 145 | 146 | 147 | 148 | 149 | 150 |  |  |  |  |  |  |
|-------|-----|-----|-----|-----|-----|-----|-----|-----|-----|-----|-----|-----|-----|-----|-----|-----|-----|-----|-----|-----|-----|-----|-----|-----|-----|-----|-----|-----|-----|-----|--|--|--|--|--|--|
| AA    | H   | K   | E   | M   | P   | F   | P   | K   | Y   | P   | V   | E   | P   | F   | T   | E   | S   | Q   | S   | L   | T   | L   | T   | D   | V   | E   | N   | L   | H   | L   |  |  |  |  |  |  |
| Total | 14  | 14  | 16  | 18  | 18  | 18  | 18  | 18  | 17  | 17  | 17  | 17  | 17  | 17  | 14  | 14  | 14  | 14  | 11  | 8   | 3   | 4   | 4   | 4   | 4   | 4   | 5   | 5   | 6   | 7   |  |  |  |  |  |  |
| P1    | 10  | 10  | 11  | 13  | 13  | 13  | 13  | 13  | 12  | 13  | 13  | 13  | 13  | 13  | 10  | 10  | 10  | 10  | 9   | 6   | 2   | 2   | 2   | 2   | 2   | 2   | 3   | 3   | 3   | 4   |  |  |  |  |  |  |
| P2    | 8   | 8   | 9   | 11  | 11  | 11  | 11  | 11  | 10  | 10  | 10  | 10  | 10  | 10  | 7   | 7   | 7   | 7   | 7   | 4   | 1   | 1   | 1   | 1   | 1   | 1   | 2   | 2   | 3   | 4   |  |  |  |  |  |  |
| L1    | 10  | 10  | 11  | 11  | 11  | 11  | 11  | 11  | 13  | 13  | 13  | 13  | 13  | 13  | 12  | 12  | 12  | 12  | 9   | 6   | 2   | 3   | 3   | 3   | 3   | 3   | 3   | 3   | 3   |     |  |  |  |  |  |  |
| L2    | 7   | 7   | 8   | 8   | 8   | 8   | 8   | 8   | 7   | 8   | 8   | 8   | 8   | 8   | 8   | 8   | 8   | 8   | 7   | 5   | 3   | 4   | 4   | 4   | 4   | 4   | 4   | 4   | 4   |     |  |  |  |  |  |  |

| Pos   | 151 | 152 | 153 | 154 | 155 | 156 | 157 | 158 | 159 | 160 | 161 | 162 | 163 | 164 | 165 | 166 | 167 | 168 | 169 | 170 | 171 | 172 | 173 | 174 | 175 | 176 | 177 | 178 | 179 | 180 |  |  |  |  |  |  |
|-------|-----|-----|-----|-----|-----|-----|-----|-----|-----|-----|-----|-----|-----|-----|-----|-----|-----|-----|-----|-----|-----|-----|-----|-----|-----|-----|-----|-----|-----|-----|--|--|--|--|--|--|
| AA    | P   | L   | P   | P   | L   | L   | Q   | S   | W   | M   | H   | Q   | P   | L   | P   | P   | T   | V   | M   | F   | P   | P   | Q   | S   | S   | V   | L   | S   | L   |     |  |  |  |  |  |  |
| Total | 7   | 7   | 7   | 15  | 17  | 17  | 19  | 21  | 21  | 21  | 20  | 18  | 17  | 16  | 15  | 14  | 14  | 14  | 13  | 5   | 4   | 3   | 4   | 4   | 4   | 6   | 21  | 26  | 39  | 47  |  |  |  |  |  |  |
| P1    | 4   | 4   | 4   | 3   | 3   | 3   | 3   | 3   | 2   | 2   | 2   | 2   | 2   | 2   | 2   | 2   | 2   | 2   | 1   | 1   | 1   | 1   | 1   | 1   | 1   | 2   | 3   | 6   | 12  | 14  |  |  |  |  |  |  |
| P2    | 4   | 4   | 4   | 4   | 4   | 4   | 4   | 4   | 4   | 4   | 4   | 4   | 4   | 4   | 4   | 4   | 4   | 4   | 2   | 2   | 1   | 2   | 2   | 2   | 2   | 3   | 3   | 8   | 18  | 21  |  |  |  |  |  |  |
| L1    | 3   | 3   | 3   | 10  | 12  | 12  | 14  | 16  | 18  | 18  | 18  | 16  | 15  | 14  | 13  | 12  | 12  | 12  | 11  | 3   | 2   | 2   | 2   | 2   | 2   | 4   | 18  | 21  | 32  | 39  |  |  |  |  |  |  |
| L2    | 4   | 4   | 4   | 9   | 9   | 9   | 9   | 9   | 10  | 10  | 9   | 7   | 6   | 5   | 4   | 4   | 4   | 4   | 4   |     |     |     |     |     | 1   | 14  | 18  | 27  | 36  |     |  |  |  |  |  |  |

| Pos   | 181 | 182 | 183 | 184 | 185 | 186 | 187 | 188 | 189 | 190 | 191 | 192 | 193 | 194 | 195 | 196 | 197 | 198 | 199 | 200 | 201 | 202 | 203 | 204 | 205 | 206 | 207 | 208 | 209 | 210 |  |  |  |  |  |  |
|-------|-----|-----|-----|-----|-----|-----|-----|-----|-----|-----|-----|-----|-----|-----|-----|-----|-----|-----|-----|-----|-----|-----|-----|-----|-----|-----|-----|-----|-----|-----|--|--|--|--|--|--|
| AA    | S   | Q   | S   | K   | V   | L   | P   | V   | P   | Q   | K   | A   | V   | P   | Y   | P   | Q   | R   | D   | M   | P   | I   | Q   | A   | F   | L   | L   | Y   | Q   | E   |  |  |  |  |  |  |
| Total | 61  | 62  | 66  | 68  | 69  | 70  | 70  | 68  | 68  | 66  | 68  | 71  | 77  | 78  | 82  | 82  | 80  | 71  | 71  | 71  | 71  | 62  | 62  | 54  | 37  | 22  | 12  | 12  | 13  | 17  |  |  |  |  |  |  |
| P1    | 18  | 19  | 20  | 21  | 23  | 25  | 25  | 25  | 25  | 25  | 26  | 26  | 30  | 30  | 31  | 31  | 31  | 22  | 22  | 22  | 22  | 22  | 21  | 21  | 20  | 14  | 4   | 5   | 7   | 8   |  |  |  |  |  |  |
| P2    | 28  | 29  | 32  | 33  | 35  | 36  | 36  | 36  | 36  | 35  | 38  | 39  | 42  | 42  | 43  | 43  | 43  | 35  | 35  | 35  | 35  | 33  | 33  | 31  | 21  | 10  | 10  | 10  | 11  |     |  |  |  |  |  |  |
| L1    | 51  | 52  | 55  | 57  | 59  | 59  | 59  | 57  | 57  | 55  | 57  | 59  | 65  | 66  | 70  | 70  | 68  | 59  | 59  | 59  | 59  | 50  | 50  | 42  | 25  | 19  | 9   | 12  | 13  |     |  |  |  |  |  |  |
| L2    | 43  | 43  | 45  | 46  | 48  | 48  | 48  | 48  | 48  | 46  | 50  | 50  | 51  | 51  | 51  | 51  | 49  | 42  | 42  | 42  | 42  | 38  | 38  | 36  | 27  | 14  | 10  | 11  | 11  |     |  |  |  |  |  |  |

| Pos   | 211 | 212 | 213 | 214 | 215 | 216 | 217 | 218 | 219 | 220 | 221 | 222 | 223 | 224 |  |  |  |  |  |  |
|-------|-----|-----|-----|-----|-----|-----|-----|-----|-----|-----|-----|-----|-----|-----|--|--|--|--|--|--|
| AA    | P   | V   | L   | G   | P   | V   | R   | G   | P   | F   | P   | I   | I   | V   |  |  |  |  |  |  |
| Total | 19  | 21  | 22  | 25  | 26  | 26  | 26  | 25  | 25  | 25  | 25  | 19  | 15  | 12  |  |  |  |  |  |  |
| P1    | 12  | 12  | 12  | 14  | 15  | 15  | 15  | 14  | 14  | 14  | 14  | 11  | 10  | 8   |  |  |  |  |  |  |
| P2    | 16  | 17  | 18  | 21  | 22  | 22  | 22  | 21  | 21  | 21  | 21  | 17  | 14  | 11  |  |  |  |  |  |  |
| L1    | 17  | 19  | 20  | 22  | 23  | 23  | 23  | 23  | 23  | 23  | 23  | 17  | 14  | 12  |  |  |  |  |  |  |
| L2    | 17  | 17  | 17  | 19  | 20  | 20  | 20  | 19  | 19  | 19  | 19  | 14  | 11  | 9   |  |  |  |  |  |  |



| Signal Peptide |     |     |     |     |     |     |     |     |     |     |     |     |     |     |     |     |     |     |     |     |     |     |     |     |     |     |     |     |     |     |  |
|----------------|-----|-----|-----|-----|-----|-----|-----|-----|-----|-----|-----|-----|-----|-----|-----|-----|-----|-----|-----|-----|-----|-----|-----|-----|-----|-----|-----|-----|-----|-----|--|
| Pos            | 1   | 2   | 3   | 4   | 5   | 6   | 7   | 8   | 9   | 10  | 11  | 12  | 13  | 14  | 15  | 16  | 17  | 18  | 19  | 20  | 21  | 22  | 23  | 24  | 25  | 26  | 27  | 28  | 29  | 30  |  |
| AA             | M   | K   | V   | L   | I   | L   | A   | C   | L   | V   | A   | L   | A   | L   | A   | R   | E   | T   | I   | E   | S   | L   | S   | S   | S   | E   | E   | S   | I   | T   |  |
| Total          |     |     |     |     |     |     |     |     |     |     |     |     |     |     |     | 29  | 39  | 41  | 43  | 45  | 51  | 52  | 59  | 60  | 63  | 65  | 66  | 66  | 66  | 66  |  |
| D1             |     |     |     |     |     |     |     |     |     |     |     |     |     |     |     | 25  | 33  | 34  | 35  | 36  | 42  | 43  | 47  | 48  | 50  | 52  | 53  | 53  | 53  | 53  |  |
| D2             |     |     |     |     |     |     |     |     |     |     |     |     |     |     |     | 28  | 38  | 40  | 42  | 44  | 50  | 51  | 58  | 59  | 62  | 64  | 65  | 65  | 65  | 65  |  |
| Pos            | 31  | 32  | 33  | 34  | 35  | 36  | 37  | 38  | 39  | 40  | 41  | 42  | 43  | 44  | 45  | 46  | 47  | 48  | 49  | 50  | 51  | 52  | 53  | 54  | 55  | 56  | 57  | 58  | 59  | 60  |  |
| AA             | E   | Y   | K   | Q   | K   | V   | E   | K   | V   | K   | H   | E   | D   | Q   | Q   | Q   | G   | E   | D   | E   | H   | Q   | D   | K   | I   | Y   | P   | S   | F   | Q   |  |
| Total          | 66  | 65  | 65  | 49  | 50  | 44  | 42  | 41  | 27  | 27  | 25  | 24  | 25  | 25  | 25  | 25  | 23  | 22  | 22  | 22  | 22  | 22  | 22  | 20  | 15  | 15  | 12  | 6   | 3   | 2   |  |
| D1             | 53  | 52  | 52  | 38  | 39  | 34  | 33  | 33  | 22  | 22  | 20  | 19  | 20  | 20  | 20  | 20  | 18  | 17  | 17  | 17  | 17  | 17  | 17  | 17  | 12  | 12  | 10  | 4   | 1   | 1   |  |
| D2             | 65  | 64  | 64  | 48  | 49  | 43  | 41  | 40  | 26  | 26  | 24  | 24  | 25  | 25  | 25  | 25  | 23  | 22  | 22  | 22  | 22  | 22  | 22  | 20  | 15  | 15  | 12  | 6   | 3   | 2   |  |
| Pos            | 61  | 62  | 63  | 64  | 65  | 66  | 67  | 68  | 69  | 70  | 71  | 72  | 73  | 74  | 75  | 76  | 77  | 78  | 79  | 80  | 81  | 82  | 83  | 84  | 85  | 86  | 87  | 88  | 89  | 90  |  |
| AA             | P   | Q   | P   | L   | I   | Y   | P   | F   | V   | E   | P   | I   | P   | Y   | G   | F   | L   | P   | Q   | N   | I   | L   | P   | L   | A   | Q   | P   | A   | V   | V   |  |
| Total          | 2   | 2   | 2   | 1   | 1   | 1   | 1   | 1   | 1   | 1   | 1   | 1   | 1   | 1   | 1   | 1   | 1   | 1   | 1   | 1   | 2   | 2   | 4   | 5   | 7   | 9   | 9   | 11  | 14  | 15  |  |
| D1             | 1   | 1   | 1   |     |     |     |     |     |     |     |     |     |     |     | 1   | 1   | 1   | 1   | 1   | 1   | 1   | 1   | 1   | 1   | 1   | 1   | 1   | 2   | 3   | 3   |  |
| D2             | 2   | 2   | 2   | 1   | 1   | 1   | 1   | 1   | 1   | 1   | 1   | 1   | 1   | 1   | 1   | 1   | 1   | 1   | 1   | 1   | 2   | 2   | 4   | 5   | 7   | 9   | 9   | 11  | 14  | 15  |  |
| Pos            | 91  | 92  | 93  | 94  | 95  | 96  | 97  | 98  | 99  | 100 | 101 | 102 | 103 | 104 | 105 | 106 | 107 | 108 | 109 | 110 | 111 | 112 | 113 | 114 | 115 | 116 | 117 | 118 | 119 | 120 |  |
| AA             | L   | P   | V   | P   | Q   | P   | E   | I   | M   | E   | V   | P   | K   | A   | K   | D   | T   | V   | Y   | T   | K   | G   | R   | V   | M   | P   | V   | L   | K   | S   |  |
| Total          | 16  | 17  | 17  | 17  | 17  | 18  | 18  | 18  | 18  | 19  | 20  | 20  | 20  | 23  | 26  | 32  | 32  | 31  | 32  | 32  | 27  | 21  | 22  | 24  | 29  | 29  | 29  | 29  | 24  | 17  |  |
| D1             | 3   | 3   | 3   | 3   | 3   | 3   | 3   | 3   | 3   | 4   | 5   | 5   | 5   | 9   | 11  | 13  | 13  | 12  | 12  | 12  | 10  | 11  | 11  | 12  | 15  | 15  | 15  | 15  | 13  | 7   |  |
| D2             | 16  | 17  | 17  | 17  | 17  | 18  | 18  | 18  | 18  | 19  | 20  | 20  | 20  | 23  | 26  | 32  | 32  | 31  | 32  | 32  | 27  | 21  | 22  | 24  | 29  | 29  | 29  | 29  | 24  | 17  |  |
| Pos            | 121 | 122 | 123 | 124 | 125 | 126 | 127 | 128 | 129 | 130 | 131 | 132 | 133 | 134 | 135 | 136 | 137 | 138 | 139 | 140 | 141 | 142 | 143 | 144 | 145 | 146 | 147 | 148 | 149 | 150 |  |
| AA             | P   | T   | I   | P   | F   | F   | D   | P   | Q   | I   | P   | K   | L   | T   | D   | L   | E   | N   | L   | H   | L   | P   | L   | P   | L   | L   | Q   | P   | L   | M   |  |
| Total          | 17  | 17  | 17  | 18  | 17  | 17  | 18  | 16  | 16  | 16  | 16  | 11  | 1   | 1   | 1   | 1   | 1   | 1   | 1   | 1   | 1   | 1   | 1   | 1   | 1   | 1   | 1   | 1   | 1   |     |  |
| D1             | 7   | 7   | 7   | 8   | 8   | 8   | 9   | 9   | 9   | 9   | 9   | 7   | 1   | 1   | 1   | 1   | 1   | 1   | 1   | 1   | 1   | 1   | 1   | 1   | 1   | 1   | 1   | 1   |     |     |  |
| D2             | 17  | 17  | 17  | 18  | 17  | 17  | 18  | 16  | 16  | 16  | 16  | 11  | 1   | 1   | 1   | 1   | 1   | 1   | 1   | 1   | 1   | 1   | 1   | 1   | 1   | 1   | 1   | 1   |     |     |  |
| Pos            | 151 | 152 | 153 | 154 | 155 | 156 | 157 | 158 | 159 | 160 | 161 | 162 | 163 | 164 | 165 | 166 | 167 | 168 | 169 | 170 | 171 | 172 | 173 | 174 | 175 | 176 | 177 | 178 | 179 | 180 |  |
| AA             | Q   | Q   | V   | P   | Q   | P   | I   | P   | Q   | T   | L   | A   | L   | P   | P   | Q   | P   | L   | W   | S   | V   | P   | Q   | P   | K   | V   | L   | P   | I   | P   |  |
| Total          |     |     |     |     |     |     |     |     |     |     |     |     |     |     |     |     |     |     |     |     |     |     |     |     |     | 3   | 4   | 4   | 4   | 4   |  |
| D1             |     |     |     |     |     |     |     |     |     |     |     |     |     |     |     |     |     |     |     |     |     |     |     |     |     | 2   | 3   | 3   | 3   | 3   |  |
| D2             |     |     |     |     |     |     |     |     |     |     |     |     |     |     |     |     |     |     |     |     |     |     |     |     |     | 3   | 4   | 4   | 4   | 4   |  |
| Pos            | 181 | 182 | 183 | 184 | 185 | 186 | 187 | 188 | 189 | 190 | 191 | 192 | 193 | 194 | 195 | 196 | 197 | 198 | 199 | 200 | 201 | 202 | 203 | 204 | 205 | 206 | 207 | 208 | 209 | 210 |  |
| AA             | Q   | Q   | V   | V   | P   | Y   | P   | Q   | R   | A   | V   | P   | V   | Q   | A   | L   | L   | L   | N   | Q   | E   | L   | L   | L   | N   | P   | T   | H   | Q   | I   |  |
| Total          | 4   | 4   | 4   | 4   | 4   | 4   | 4   | 4   | 4   | 4   | 5   | 5   | 5   | 5   | 5   | 4   | 4   | 5   | 5   | 6   | 6   | 7   | 7   | 7   | 8   | 9   | 10  | 10  | 10  | 10  |  |
| D1             | 3   | 3   | 3   | 3   | 3   | 3   | 3   | 3   | 3   | 2   | 3   | 3   | 3   | 3   | 4   | 3   | 3   | 4   | 4   | 5   | 5   | 6   | 6   | 6   | 7   | 8   | 9   | 9   | 9   | 9   |  |
| D2             | 4   | 4   | 4   | 4   | 4   | 4   | 4   | 4   | 4   | 4   | 5   | 5   | 5   | 5   | 5   | 4   | 4   | 5   | 5   | 6   | 6   | 7   | 7   | 7   | 8   | 9   | 10  | 10  | 10  | 10  |  |
| Pos            | 211 | 212 | 213 | 214 | 215 | 216 | 217 | 218 | 219 | 220 | 221 | 222 | 223 | 224 | 225 | 226 |     |     |     |     |     |     |     |     |     |     |     |     |     |     |  |
| AA             | Y   | P   | V   | T   | Q   | P   | L   | A   | P   | V   | H   | N   | P   | I   | S   | V   |     |     |     |     |     |     |     |     |     |     |     |     |     |     |  |
| Total          | 11  | 11  | 11  | 11  | 12  | 13  | 13  | 14  | 14  | 14  | 14  | 13  | 13  | 13  | 13  | 13  |     |     |     |     |     |     |     |     |     |     |     |     |     |     |  |
| D1             | 10  | 10  | 10  | 10  | 11  | 12  | 12  | 13  | 13  | 13  | 13  | 13  | 13  | 13  | 13  | 13  |     |     |     |     |     |     |     |     |     |     |     |     |     |     |  |
| D2             | 11  | 11  | 11  | 11  | 12  | 13  | 13  | 14  | 14  | 14  | 14  | 13  | 13  | 13  | 13  | 13  |     |     |     |     |     |     |     |     |     |     |     |     |     |     |  |



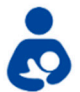

**Figure S3:** Sequence coverage of  $\beta$ -casein (85.2 % excluding the signal peptide) derived from all peptides identified in human milk (total) and for each individual sample (D1 and D2).

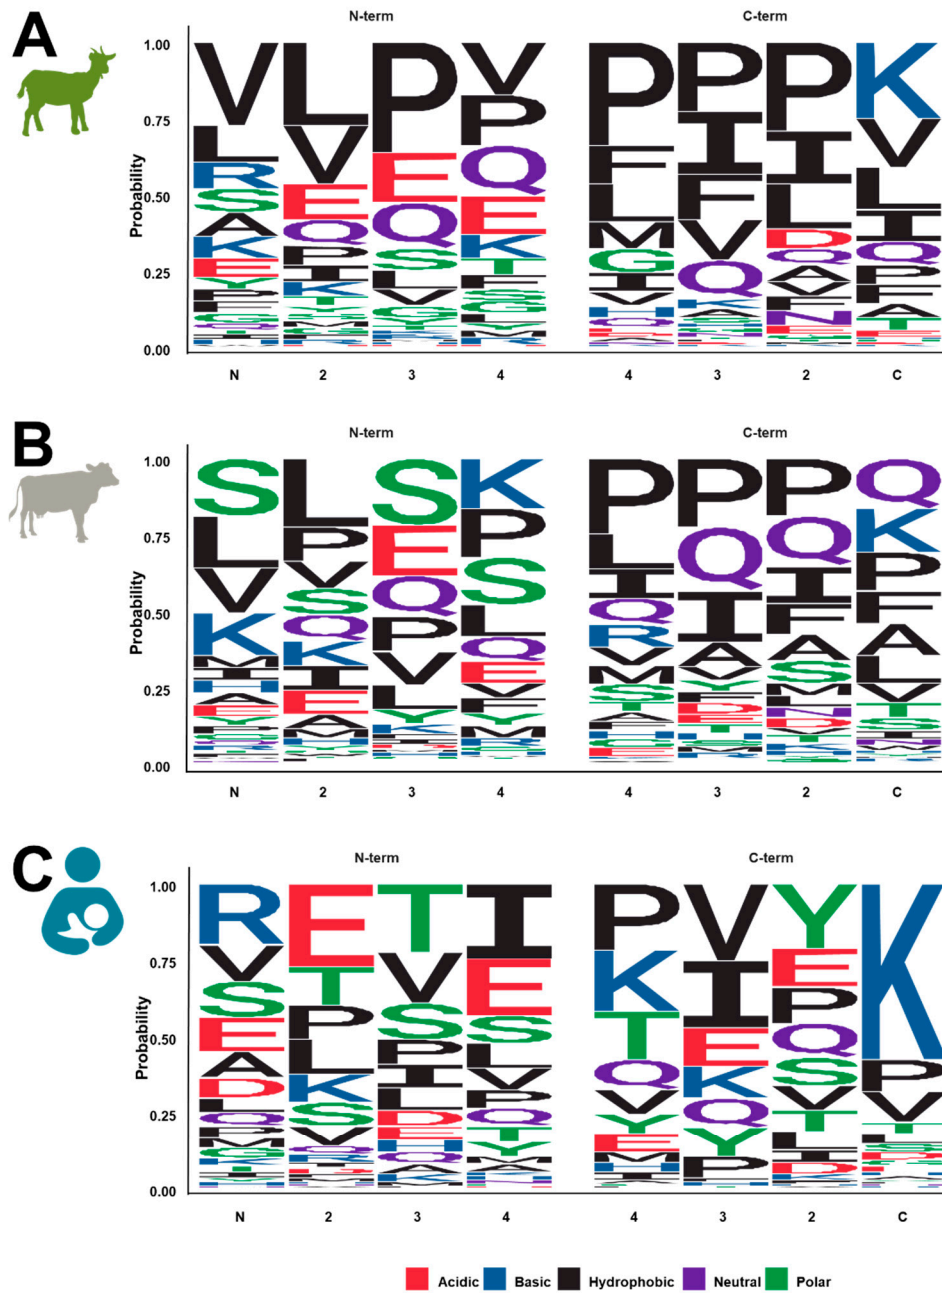

**Figure S4:** Sequence logo displaying cleavage patterns considering all  $\beta$ -casein-derived peptides identified in goat milk-based IF (A), cow milk-based IF (B), and human milk (C).

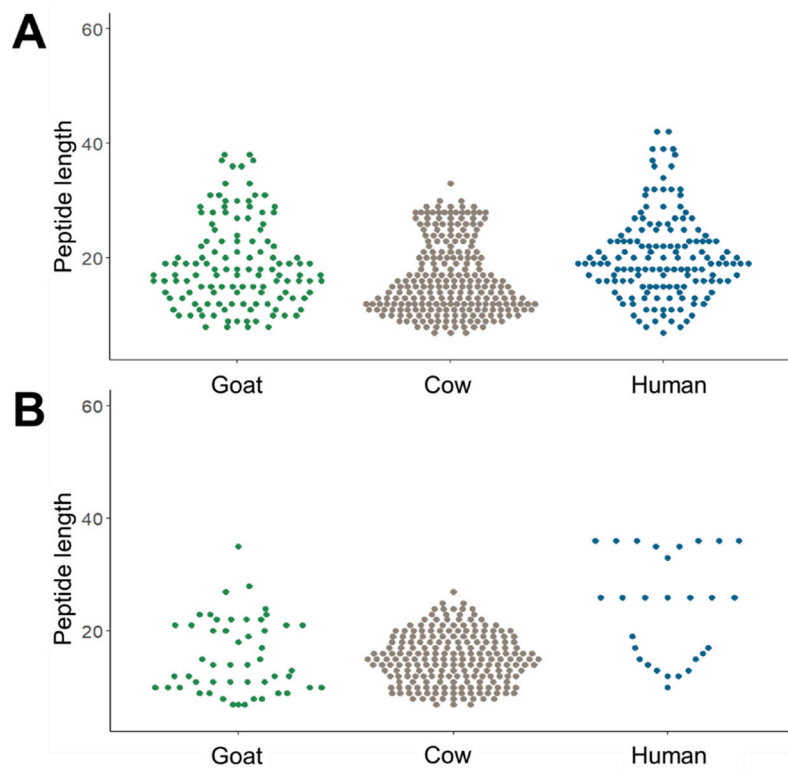

**Figure S5:** Distribution of the number of residues in  $\beta$ - (A) and  $\alpha_{S1}$ -casein-derived peptides (B) identified in goat milk-based IF, cow milk-based IF, and human milk.
