# Supplementary material for: Analysis of the Endogenous Peptidomes of Different Infant Formula Types and Human Milk
Source: Foods. 2021 Oct 26;10(11):2579. doi: 10.3390/foods10112579 (PMC8623676; doi:10.3390/foods10112579)
Supplement: Supplementary file 1 [file foods-10-02579-s001.zip › foods-1394980-supplementary.xlsx]

## Sheet: Supplement
	Supplementary Material
	Analysis of the endogenous peptidomes of different infant formula types and human milk
	Michele Wölka,b, Corinna Gebauerc, Ralf Hoffmanna,b* and Sanja Milkovska-Stamenovaa,b*
	a Institute of Bioanalytical Chemistry, Faculty of Chemistry and Mineralogy, Universität Leipzig, Deutscher Platz 5, 04103, Leipzig, Germany
	b Center for Biotechnology and Biomedicine, Universität Leipzig, Deutscher Platz 5, 04103, Leipzig, Germany
	c Department of Paediatrics, Division of Neonatology, University of Leipzig Medical Center, Liebigstr. 20 a, 04103 Leipzig, Germany
	*Correspondence: bioanaly@rz.uni-leipzig.de
	Table S1	Nutritional parameters of the analyzed IF
	Table S2	Donor-specific parameters
	Table S3	List of chemicals
	Table S4	List of native peptides identified in the two brands of powdered goat milk based IF
	Table S5	List of native peptides identified in the two brands of powdered cow milk based IF (P1 and P2) and in liquid cow milk based IF (L1 and L2)
	Table S6	List of native peptides identified in the two donated human milk samples

## Sheet: Table S1 IF samples
Table S1: Nutritional values of the analyzed IF samples including two powder goat milk based IF (G1 and G2) as well as two cow milk based powders (P1 and P2) and two liquid ready-to-drink (L1 and L2) from the same two brands. All IF were first stage IF.
	Nutritional values per 100 mL drinking amount	Goat milk based IF		Cow milk based IF
		G1	G2	P1	P2	L1	L2
	Energy	278 kJ / 66 kcal	280 kJ / 66 kcal	276 kJ / 66 kcal	276 kJ / 66 kcal	276 kJ / 66 kcal	276 kJ / 66 kcal
	Fat (g)	3.4	3.4	3.4	3.6	3.4	3.6
	Carbohydrates (g)	7.5	7.4	7.4	7	7.4	7
	- thereof lactose (g)	*	7.4	7	6.9	6.99	7
	Protein (g)	1.5	1.3	1.3	1.25	1.3	1.25
	* Out of 7.5 g Carbohydartes, 3.9 g are specified as "sugar". In the ingredients list maltodextrin is listed as the main carbohydrate, even before lactose (order by decreasing amount)

## Sheet: Table S2 Milk donors
Table S2: Donor-specific parameters
	Parameter	Donor 1	Donor 2
	Age	32	31
	Gestational age at delivery	38.4	40.1
	Neonatal gender	f	f
	Neonatal weight (g)	3170	3460
	Neonatal length (cm)	49	53

## Sheet: Table S3 Chemicals
Table S3: List of chemicals used in the study.
	Chemical	Company
	acetonitrile (>99.97%, ULC/MS – CC/SFC)	Biosolve B.V. (Valkanswaald, Netherlands)
	formic acid (>99%, ULC/MS – CC/SFC)	Biosolve B.V. (Valkanswaald, Netherlands)
	methanol (>99.97%, ULC/MS – CC/SFC)	Biosolve B.V. (Valkanswaald, Netherlands)
	chloroform (≥99.8%)	Merck KgaA (Darmstadt, Germany)
	water (resistance R>18 mΩ/cm, total organic content <10 ppb)	PureLab Ultra Analytic system (ELGA Lab water, Celle, Germany)

## Sheet: Table S4 Goat IF
Table S4: List of peptides in goat milk based IF (G1 and G2) identified by ETD and CID. An 'x' indicates that the peptide was identified in the brand.
Accession	Protein	Start*	End*	Peptide	Modification	Length	Mass	m/z (ETD)	z (ETD)	-10lgP (ETD)	Retention time (ETD)	m/z (CID)	z (CID)	-10lgP (CID)	G1	G2
P18626	Alpha-S1-casein	31	37	V.PNENLLR.F		7	854.461	428.24	2	53.33	35.17	428.239	2	51.59	x	x
P18626	Alpha-S1-casein	32	38	P.NENLLRF.V		7	904.477	453.247	2	41.17	43.92	453.247	2	69.74		x
P18626	Alpha-S1-casein	38	47	R.FVVAPFPEVF.R		10	1150.61	576.314	2	39.6	68.88	576.313	2	85.84	x	x
P18626	Alpha-S1-casein	38	48	R.FVVAPFPEVFR.K		11	1306.71	654.366	2	33.67	59.88	654.368	2	83.06	x	x
P18626	Alpha-S1-casein	38	54	R.FVVAPFPEVFRKENINE.L		17	2034.06	679.031	3	83.74	54.68	679.029	3	60.64	x	x
P18626	Alpha-S1-casein	38	56	R.FVVAPFPEVFRKENINELS.K		19	2234.17	745.736	3	39.9	58.11	745.733	3	56.7	x	x
P18626	Alpha-S1-casein	39	48	F.VVAPFPEVFR.K		10	1159.64	580.83	2	47.67	51.71	580.831	2	86.22	x	x
P18626	Alpha-S1-casein	40	48	V.VAPFPEVFR.K		9	1060.57	531.295	2	36.76	48.42	531.294	2	67.66	x
P18626	Alpha-S1-casein	49	75	R.KENINELSKDIGS(+79.97)ES(+79.97)TEDQAMEDAKQM(+15.99).K	Phosphorylation (STY); Oxidation (M)	27	3215.29	804.836	4	34.82	40.84	1072.77	3	51.15	x
P18626	Alpha-S1-casein	49	76	R.KENINELSKDIGS(+79.97)ES(+79.97)TEDQAMEDAKQMK.A	Phosphorylation (STY)	28	3327.39	832.862	4	51.37	43.17	832.861	4	75.6	x
P18626	Alpha-S1-casein	95	103	K.YIQKEDVPS.E		9	1077.53	539.777	2	58.65	23.65	539.776	2	52.24	x	x
P18626	Alpha-S1-casein	95	104	K.YIQKEDVPSE.R		10	1206.58	604.299	2	47.64	24.84	604.301	2	83.65	x	x
P18626	Alpha-S1-casein	95	105	K.YIQKEDVPSER.Y		11	1362.68	455.232	3	93.24	22.25	455.236	3	90.56	x	x
P18626	Alpha-S1-casein	95	106	K.YIQKEDVPSERY.L		12	1525.74	509.59	3	95.1	27.68	509.589	3	76.04		x
P18626	Alpha-S1-casein	95	108	K.YIQKEDVPSERYLG.Y		14	1695.85	566.293	3	105.8	33.86	566.288	3	53.41	x	x
P18626	Alpha-S1-casein	95	115	K.YIQKEDVPSERYLGYLEQLLR.L		21	2611.36	653.853	4	91.38	64.01	653.852	4	80.97		x
P18626	Alpha-S1-casein	95	116	K.YIQKEDVPSERYLGYLEQLLRL.K		22	2724.45	682.12	4	67.68	72.15	682.122	4	80.52		x
P18626	Alpha-S1-casein	95	117	K.YIQKEDVPSERYLGYLEQLLRLK.K		23	2852.54	571.519	5	111.64	65.62	714.149	4	94.76	x	x
P18626	Alpha-S1-casein	95	118	K.YIQKEDVPSERYLGYLEQLLRLKK.Y		24	2980.64	597.138	5	61.56	61.06	597.133	5	70.1		x
P18626	Alpha-S1-casein	95	129	K.YIQKEDVPSERYLGYLEQLLRLKKYNVPQLEIVPK.S		35	4261.35	853.284	5	69.68	63.98	853.285	5	67.85		x
P18626	Alpha-S1-casein	96	103	Y.IQKEDVPS.E		8	914.471	458.242	2	30.39	19.08	458.249	2	35.83		x
P18626	Alpha-S1-casein	96	105	Y.IQKEDVPSER.Y		10	1199.61	400.88	3	69.2	18.95	400.871	3	60.88	x	x
P18626	Alpha-S1-casein	96	106	Y.IQKEDVPSERY.L		11	1362.68	455.235	3	74.23	24.88	455.233	3	55.32		x
P18626	Alpha-S1-casein	99	106	K.EDVPSERY.L		8	993.44	497.729	2	32.9	24.15	497.726	2	37.2		x
P18626	Alpha-S1-casein	106	115	R.YLGYLEQLLR.L		10	1266.7	634.36	2	38.51	60.74	634.361	2	81.63		x
P18626	Alpha-S1-casein	106	116	R.YLGYLEQLLRL.K		11	1379.78	690.902	2	52.11	72.2	690.903	2	84.2		x
P18626	Alpha-S1-casein	106	117	R.YLGYLEQLLRLK.K		12	1507.88	503.632	3	64.65	62.71	503.634	3	92.45		x
P18626	Alpha-S1-casein	116	129	R.LKKYNVPQLEIVPK.S		14	1668	418.008	4	87.71	40.38	557.007	3	80.84	x	x
P18626	Alpha-S1-casein	116	138	R.LKKYNVPQLEIVPKS(+79.97)AEEQLHSM(+15.99).K	Phosphorylation (STY); Oxidation (M)	23	2776.39	695.108	4	111.11	43.82	695.108	4	44.21	x	x
P18626	Alpha-S1-casein	116	138	R.LKKYNVPQLEIVPKS(+79.97)AEEQLHSM.K	Phosphorylation (STY)	23	2760.39	691.11	4	83.2	48.63	691.111	4	86.07	x	x
P18626	Alpha-S1-casein	117	129	L.KKYNVPQLEIVPK.S		13	1554.91	519.313	3	85.5	38.03	519.313	3	84.56	x	x
P18626	Alpha-S1-casein	118	129	K.KYNVPQLEIVPK.S		12	1426.82	476.617	3	84.34	42.27	476.622	3	91.01	x	x
P18626	Alpha-S1-casein	118	138	K.KYNVPQLEIVPKS(+79.97)AEEQLHSM(+15.99).K	Phosphorylation (STY); Oxidation (M)	21	2535.21	634.813	4	106.6	45.83	846.079	3	78.61	x	x
P18626	Alpha-S1-casein	118	139	K.KYNVPQLEIVPKS(+79.97)AEEQLHSM(+15.99)K.E	Phosphorylation (STY); Oxidation (M)	22	2663.3	666.838	4	135.74	42.93	666.837	4	66.63	x	x
P18626	Alpha-S1-casein	118	138	K.KYNVPQLEIVPKS(+79.97)AEEQLHSM.K	Phosphorylation (STY)	21	2519.21	630.815	4	100.25	50.84	630.814	4	79.31	x	x
P18626	Alpha-S1-casein	118	139	K.KYNVPQLEIVPKS(+79.97)AEEQLHSMK.E	Phosphorylation (STY)	22	2647.31	662.838	4	112.32	46.83	662.84	4	81.7	x	x
P18626	Alpha-S1-casein	118	139	K.KYNVPQLEIVPKSAEEQLHSMK.E		22	2567.34	642.846	4	99.49	46.53	642.847	4	68.16	x	x
P18626	Alpha-S1-casein	119	129	K.YNVPQLEIVPK.S		11	1298.72	650.368	2	33.94	47	650.376	2	87.74	x	x
P18626	Alpha-S1-casein	119	138	K.YNVPQLEIVPKS(+79.97)AEEQLHSM(+15.99).K	Phosphorylation (STY); Oxidation (M)	20	2407.11	803.383	3	55.63	49.57	803.378	3	61.84	x	x
P18626	Alpha-S1-casein	119	139	K.YNVPQLEIVPKS(+79.97)AEEQLHSM(+15.99)K.E	Phosphorylation (STY); Oxidation (M)	21	2535.21	634.813	4	83.64	46.28	634.81	4	36.95		x
P18626	Alpha-S1-casein	119	138	K.YNVPQLEIVPKS(+79.97)AEEQLHSM.K	Phosphorylation (STY)	20	2391.12	798.053	3	30.02	54.77	798.053	3	64.91	x	x
P18626	Alpha-S1-casein	119	138	K.YNVPQLEIVPKSAEEQLHSM.K		20	2311.15	771.396	3	46.52	54.04	771.396	3	75.12	x
P18626	Alpha-S1-casein	122	129	V.PQLEIVPK.S		8	922.549	462.284	2	35.97	42.35	462.285	2	78.54	x	x
P18626	Alpha-S1-casein	123	129	P.QLEIVPK.S		7	825.496	413.755	2	36.25	31.27	413.758	2	55.13	x	x
P18626	Alpha-S1-casein	197	214	D.IPNPIGSENSGKTTMPLW		18	1940.97	648	3	69.86	54.07	971.493	2	131.99	x
P18626	Alpha-S1-casein	200	213	N.PIGSENSGKTTM(+15.99)PL.W	Oxidation (M)	14	1446.7	724.363	2	42.9	27.33	724.363	2	71.11	x
P18626	Alpha-S1-casein	200	214	N.PIGSENSGKTTM(+15.99)PLW	Oxidation (M)	15	1632.78	545.27	3	101.62	40.59	817.402	2	111.9	x	x
P18626	Alpha-S1-casein	200	214	N.PIGSENSGKTTMPLW		15	1616.79	539.939	3	90.21	47.37	809.407	2	116.94	x	x
P18626	Alpha-S1-casein	203	214	G.SENSGKTTMPLW		12	1349.63	675.827	2	35.58	43.51	675.825	2	82.68	x
P18626	Alpha-S1-casein	206	214	N.SGKTTM(+15.99)PLW	Oxidation (M)	9	1035.51	518.763	2	30.41	34.5	518.765	2	73.04	x	x
P18626	Alpha-S1-casein	206	214	N.SGKTTMPLW		9	1019.51	510.765	2	45.88	43.08	510.767	2	78.94	x	x
P33049	Alpha-S2-casein	16	40	A.KHKM(+15.99)EHVS(+79.97)S(+79.97)SEEPINIFQEIYKQEK.N	Oxidation (M); Phosphorylation (STY)	25	3233.45	647.701	5	68.37	52.88	809.379	4	79.38	x	x
P33049	Alpha-S2-casein	16	40	A.KHKM(+15.99)EHVS(+79.97)SSEEPINIFQEIYKQEK.N	Oxidation (M); Phosphorylation (STY)	25	3153.48	789.385	4	108.98	49.62	631.709	5	63.24	x
P33049	Alpha-S2-casein	16	37	A.KHKM(+15.99)EHVSS(+79.97)S(+79.97)EEPINIFQEIYK.Q	Oxidation (M); Phosphorylation (STY)	22	2848.25	713.075	4	66.43	53.37	713.073	4	62.79	x
P33049	Alpha-S2-casein	16	40	A.KHKM(+15.99)EHVSS(+79.97)S(+79.97)EEPINIFQEIYKQEK.N	Oxidation (M); Phosphorylation (STY)	25	3233.45	647.702	5	75.53	52.69	809.368	4	89.1	x	x
P33049	Alpha-S2-casein	16	37	A.KHKM(+15.99)EHVSS(+79.97)SEEPINIFQEIYK.Q	Oxidation (M); Phosphorylation (STY)	22	2768.29	693.086	4	95.7	50.26	693.089	4	85.05	x	x
P33049	Alpha-S2-casein	16	40	A.KHKM(+15.99)EHVSS(+79.97)SEEPINIFQEIYKQEK.N	Oxidation (M); Phosphorylation (STY)	25	3153.48	631.71	5	108.24	49.62	789.386	4	104.55	x	x
P33049	Alpha-S2-casein	16	40	A.KHKM(+15.99)EHVSSSEEPINIFQEIYKQEK.N	Oxidation (M)	25	3073.52	769.392	4	120.05	47.41	615.714	5	78.69		x
P33049	Alpha-S2-casein	16	37	A.KHKMEHVS(+79.97)S(+79.97)S(+79.97)EEPINIFQEIYK.Q	Phosphorylation (STY)	22	2912.23	729.069	4	62.21	57.01	729.069	4	64.76	x	x
P33049	Alpha-S2-casein	16	40	A.KHKMEHVS(+79.97)S(+79.97)S(+79.97)EEPINIFQEIYKQEK.N	Phosphorylation (STY)	25	3297.42	660.497	5	91.54	56.09	825.367	4	87.61	x	x
P33049	Alpha-S2-casein	16	40	A.KHKMEHVS(+79.97)S(+79.97)SEEPINIFQEIYKQEK.N	Phosphorylation (STY)	25	3217.46	644.503	5	93.45	53.47	805.377	4	65.97	x	x
P33049	Alpha-S2-casein	16	37	A.KHKMEHVSS(+79.97)S(+79.97)EEPINIFQEIYK.Q	Phosphorylation (STY)	22	2832.26	709.078	4	88	53.71	709.076	4	92.95		x
P33049	Alpha-S2-casein	16	40	A.KHKMEHVSS(+79.97)S(+79.97)EEPINIFQEIYKQEK.N	Phosphorylation (STY)	25	3217.46	644.502	5	98.47	53.43	805.38	4	99.08	x	x
P33049	Alpha-S2-casein	16	36	A.KHKMEHVSS(+79.97)SEEPINIFQEIY.K	Phosphorylation (STY)	21	2624.2	657.061	4	31.5	54.98	875.742	3	70.37	x	x
P33049	Alpha-S2-casein	16	37	A.KHKMEHVSS(+79.97)SEEPINIFQEIYK.Q	Phosphorylation (STY)	22	2752.29	689.086	4	92.78	50.71	689.086	4	100.62	x	x
P33049	Alpha-S2-casein	16	39	A.KHKMEHVSS(+79.97)SEEPINIFQEIYKQE.K	Phosphorylation (STY)	24	3009.39	602.889	5	86.01	53.25	753.362	4	94.66	x	x
P33049	Alpha-S2-casein	16	37	A.KHKMEHVSSS(+79.97)EEPINIFQEIYK.Q	Phosphorylation (STY)	22	2752.29	689.085	4	52.88	50.99	551.469	5	88.18		x
P33049	Alpha-S2-casein	16	40	A.KHKMEHVSSSEEPINIFQEIYKQEK.N		25	3057.52	612.517	5	95.08	47.77	612.518	5	96.34		x
P33049	Alpha-S2-casein	19	37	K.M(+15.99)EHVSS(+79.97)SEEPINIFQEIYK.Q	Oxidation (M); Phosphorylation (STY)	19	2375.04	792.693	3	67.31	60.27	792.694	3	86.26	x	x
P33049	Alpha-S2-casein	19	40	K.M(+15.99)EHVSS(+79.97)SEEPINIFQEIYKQEK.N	Oxidation (M); Phosphorylation (STY)	22	2760.24	691.071	4	89.33	58.15	921.093	3	91.53	x	x
P33049	Alpha-S2-casein	19	37	K.MEHVSS(+79.97)SEEPINIFQEIYK.Q	Phosphorylation (STY)	19	2359.04	787.361	3	72.26	61.24	787.358	3	116.4	x	x
P33049	Alpha-S2-casein	19	40	K.MEHVSS(+79.97)SEEPINIFQEIYKQEK.N	Phosphorylation (STY)	22	2744.24	687.073	4	96.17	59.11	915.761	3	98.43	x	x
P33049	Alpha-S2-casein	19	40	K.MEHVSSSEEPINIFQEIYKQEK.N		22	2664.27	667.08	4	110.46	55.15	667.08	4	101.12	x	x
P33049	Alpha-S2-casein	20	40	M.EHVSS(+79.97)SEEPINIFQEIYKQEK.N	Phosphorylation (STY)	21	2613.2	654.311	4	90.92	58.48	872.083	3	91.48	x
P33049	Alpha-S2-casein	22	40	H.VSS(+79.97)SEEPINIFQEIYKQEK.N	Phosphorylation (STY)	19	2347.1	783.379	3	41.8	62	783.379	3	58.22	x
P33049	Alpha-S2-casein	25	40	S.SEEPINIFQEIYKQEK.N		16	1994	665.678	3	68.44	56.65	665.679	3	95.36	x
P33049	Alpha-S2-casein	26	40	S.EEPINIFQEIYKQEK.N		15	1906.97	636.667	3	62	56.49	636.668	3	89.72	x
P33049	Alpha-S2-casein	29	37	P.INIFQEIYK.Q		9	1166.63	584.327	2	56.85	53.97	584.327	2	72.22	x	x
P33049	Alpha-S2-casein	31	37	N.IFQEIYK.Q		7	939.506	470.763	2	53.95	35.13	470.763	2	54.58	x	x
P33049	Alpha-S2-casein	32	38	I.FQEIYKQ.E		7	954.481	478.249	2	38.51	27.4	478.248	2	56.64		x
P33049	Alpha-S2-casein	87	94	K.ITVDDKHY.Q		8	989.482	495.75	2	60.41	23.13	495.753	2	63.5	x	x
P33049	Alpha-S2-casein	87	95	K.ITVDDKHYQ.K		9	1117.54	559.78	2	40.85	22.14	559.78	2	75.24	x	x
P33049	Alpha-S2-casein	88	94	I.TVDDKHY.Q		7	876.398	439.205	2	34.13	23.09	439.212	2	46.68		x
P33049	Alpha-S2-casein	89	95	T.VDDKHYQ.K		7	903.409	452.71	2	29.96	21.96	452.711	2	42.02		x
P33049	Alpha-S2-casein	97	130	K.ALNEINQFYQKFPQYLQYPYQGPIVLNPWDQVKR.N		34	4197.15	840.443	5	61.41	67.44	1050.3	4	103.02		x
P33049	Alpha-S2-casein	111	129	Q.YLQYPYQGPIVLNPWDQVK.R		19	2320.19	774.406	3	29.88	61.24	774.408	3	102.65	x	x
P33049	Alpha-S2-casein	131	165	R.NAGPFTPTVNREQLS(+79.97)T(+79.97)SEENSKKTIDMES(+79.97)TEVFTK.K	Phosphorylation (STY)	35	4154.78	831.969	5	65.5	47.36	1039.71	4	31.02	x
P33049	Alpha-S2-casein	131	153	R.NAGPFTPTVNREQLS(+79.97)TS(+79.97)EENSKK.T	Phosphorylation (STY)	23	2693.17	674.304	4	93.42	34.42	898.737	3	47.45	x	x
P33049	Alpha-S2-casein	131	152	R.NAGPFTPTVNREQLST(+79.97)SEENSK.K	Phosphorylation (STY)	22	2485.11	829.383	3	37.37	36.03	829.383	3	41.51		x
P33049	Alpha-S2-casein	131	152	R.NAGPFTPTVNREQLSTS(+79.97)EENSK.K	Phosphorylation (STY)	22	2485.11	829.383	3	51.83	36.06	829.386	3	62.95	x	x
P33049	Alpha-S2-casein	131	153	R.NAGPFTPTVNREQLSTS(+79.97)EENSKK.T	Phosphorylation (STY)	23	2613.21	654.312	4	112.11	33.47	872.082	3	51.73	x	x
P33049	Alpha-S2-casein	131	165	R.NAGPFTPTVNREQLSTS(+79.97)EENSKKTIDMES(+79.97)TEVFTK.K	Phosphorylation (STY)	35	4074.82	815.977	5	90.68	45.78	1019.72	4	71.04	x	x
P33049	Alpha-S2-casein	131	166	R.NAGPFTPTVNREQLSTS(+79.97)EENSKKTIDMES(+79.97)TEVFTKK.T	Phosphorylation (STY)	36	4202.91	841.596	5	58.66	43.48	1051.74	4	71.1	x	x
P33049	Alpha-S2-casein	131	165	R.NAGPFTPTVNREQLSTSEENS(+79.97)KKTIDMES(+79.97)TEVFTK.K	Phosphorylation (STY)	35	4074.82	1019.72	4	29.67	45.78	1019.72	4	69.76	x	x
P33049	Alpha-S2-casein	131	152	R.NAGPFTPTVNREQLSTSEENSK.K		22	2405.15	802.727	3	69.74	34.8	802.723	3	27.74	x	x
P33049	Alpha-S2-casein	131	165	R.NAGPFTPTVNREQLSTSEENSKKTIDMES(+79.97)TEVFTK.K	Phosphorylation (STY)	35	3994.85	799.983	5	63.83	45.02	999.727	4	38.25	x	x
P33049	Alpha-S2-casein	131	166	R.NAGPFTPTVNREQLSTSEENSKKTIDMES(+79.97)TEVFTKK.T	Phosphorylation (STY)	36	4122.95	825.601	5	54.83	43.21	825.601	5	27.72	x
P33049	Alpha-S2-casein	135	152	P.FTPTVNREQLSTS(+79.97)EENSK.K	Phosphorylation (STY)	18	2145.96	716.332	3	97.01	31.18	716.327	3	46.86	x	x
P33049	Alpha-S2-casein	151	165	N.SKKTIDM(+15.99)ES(+79.97)TEVFTK.K	Oxidation (M); Phosphorylation (STY)	15	1838.84	613.952	3	80.73	27.39	613.954	3	39.48	x	x
P33049	Alpha-S2-casein	151	166	N.SKKTIDM(+15.99)ES(+79.97)TEVFTKK.T	Oxidation (M); Phosphorylation (STY)	16	1966.93	492.739	4	110.94	24.93	492.741	4	32.3	x	x
P33049	Alpha-S2-casein	153	165	K.KTIDM(+15.99)ES(+79.97)TEVFTK.K	Oxidation (M); Phosphorylation (STY)	13	1623.71	542.246	3	69.4	30.65	812.867	2	74.41	x	x
P33049	Alpha-S2-casein	153	166	K.KTIDM(+15.99)ES(+79.97)TEVFTKK.T	Oxidation (M); Phosphorylation (STY)	14	1751.81	584.946	3	125.35	27.47	584.948	3	94.98	x	x
P33049	Alpha-S2-casein	153	168	K.KTIDM(+15.99)ES(+79.97)TEVFTKKTK.L	Oxidation (M); Phosphorylation (STY)	16	1980.95	496.246	4	120.82	25.48	496.245	4	54.56	x	x
P33049	Alpha-S2-casein	153	165	K.KTIDMES(+79.97)TEVFTK.K	Phosphorylation (STY)	13	1607.72	536.916	3	107.69	38.26	804.869	2	99.63	x	x
P33049	Alpha-S2-casein	153	166	K.KTIDMES(+79.97)TEVFTKK.T	Phosphorylation (STY)	14	1735.81	579.614	3	108.48	34.62	579.618	3	94.49	x	x
P33049	Alpha-S2-casein	154	165	K.TIDM(+15.99)ES(+79.97)TEVFTK.K	Oxidation (M); Phosphorylation (STY)	12	1495.62	748.819	2	33.21	34.77	748.821	2	87.35	x	x
P33049	Alpha-S2-casein	154	168	K.TIDM(+15.99)ES(+79.97)TEVFTKKTK.L	Oxidation (M); Phosphorylation (STY)	15	1852.85	618.623	3	41.54	27.92	618.624	3	57.73		x
P33049	Alpha-S2-casein	154	165	K.TIDM(+15.99)ESTEVFTK.K	Oxidation (M)	12	1415.65	708.837	2	28.7	34.12	740.822	2	91.39	x	x
P33049	Alpha-S2-casein	154	166	K.TIDMESTEVFTKK.T		13	1527.75	510.259	3	91.4	37.94	510.26	3	46.06	x	x
P33049	Alpha-S2-casein	155	165	T.IDMES(+79.97)TEVFTK.K	Phosphorylation (STY)	11	1378.57	690.298	2	28.89	42.7	690.296	2	90.36	x	x
P33049	Alpha-S2-casein	155	166	T.IDMES(+79.97)TEVFTKK.T	Phosphorylation (STY)	12	1506.67	503.232	3	91.39	37.94	503.237	3	67.56	x	x
P33049	Alpha-S2-casein	156	165	I.DMES(+79.97)TEVFTK.K	Phosphorylation (STY)	10	1265.49	633.755	2	36.38	36.88	633.752	2	57.82	x
P33049	Alpha-S2-casein	166	179	K.KTKLTEEEKNRLNF.L		14	1748.94	438.244	4	106.06	28.62	438.241	4	64.27	x	x
P33049	Alpha-S2-casein	166	180	K.KTKLTEEEKNRLNFL.K		15	1862.03	466.516	4	99.67	36.21	621.686	3	92.72	x	x
P33049	Alpha-S2-casein	166	181	K.KTKLTEEEKNRLNFLK.K		16	1990.12	498.539	4	134.51	32.02	498.542	4	65.79	x	x
P33049	Alpha-S2-casein	167	177	K.TKLTEEEKNRL.N		11	1359.74	454.252	3	64.8	22.79	454.247	3	39.99		x
P33049	Alpha-S2-casein	167	178	K.TKLTEEEKNRLN.F		12	1473.78	492.269	3	73.72	20.97	492.268	3	60.39	x	x
P33049	Alpha-S2-casein	167	179	K.TKLTEEEKNRLNF.L		13	1620.85	541.292	3	109.88	32.41	541.292	3	62.53	x	x
P33049	Alpha-S2-casein	167	180	K.TKLTEEEKNRLNFL.K		14	1733.93	434.492	4	119.87	39.98	578.989	3	90.84	x	x
P33049	Alpha-S2-casein	167	181	K.TKLTEEEKNRLNFLK.K		15	1862.03	466.516	4	125.74	35.13	466.525	4	87.46	x	x
P33049	Alpha-S2-casein	169	180	K.LTEEEKNRLNFL.K		12	1504.79	502.606	3	88.79	41.47	502.609	3	46.76	x	x
P33049	Alpha-S2-casein	169	181	K.LTEEEKNRLNFLK.K		13	1632.88	409.23	4	110.17	35.17	545.304	3	61.94	x	x
P33049	Alpha-S2-casein	170	180	L.TEEEKNRLNFL.K		11	1391.7	464.911	3	85.07	38.65	464.912	3	75.01	x	x
P33049	Alpha-S2-casein	190	204	K.FAWPQYLKTVDQHQK.A		15	1887.96	473.001	4	107	45.62	473.003	4	67.94		x
P33049	Alpha-S2-casein	194	203	P.QYLKTVDQHQ.K		10	1258.63	420.55	3	83.27	21.17	420.547	3	31.86		x
P33049	Alpha-S2-casein	198	213	K.TVDQHQKAM(+15.99)KPWTQPK.T	Oxidation (M)	16	1937.98	485.501	4	88.42	19.4	647	3	63.37	x	x
P33049	Alpha-S2-casein	198	215	K.TVDQHQKAM(+15.99)KPWTQPKTN.A	Oxidation (M)	18	2153.07	539.277	4	86.02	20.25	539.278	4	28.74	x	x
P33049	Alpha-S2-casein	198	218	K.TVDQHQKAM(+15.99)KPWTQPKTNAIP.Y	Oxidation (M)	21	2434.24	609.572	4	85.47	29.54	609.573	4	26.1	x	x
P33049	Alpha-S2-casein	198	219	K.TVDQHQKAM(+15.99)KPWTQPKTNAIPY.V	Oxidation (M)	22	2597.31	650.338	4	95.82	33.1	650.338	4	36.06	x	x
P33049	Alpha-S2-casein	198	221	K.TVDQHQKAM(+15.99)KPWTQPKTNAIPYVR.Y	Oxidation (M)	24	2852.48	571.505	5	96.21	33.12	571.508	5	51.28	x	x
P33049	Alpha-S2-casein	198	222	K.TVDQHQKAM(+15.99)KPWTQPKTNAIPYVRY.L	Oxidation (M)	25	3015.54	604.119	5	81.15	37.33	604.123	5	40.35	x	x
P33049	Alpha-S2-casein	198	223	K.TVDQHQKAM(+15.99)KPWTQPKTNAIPYVRYL	Oxidation (M)	26	3128.62	626.736	5	94.49	43.79	626.737	5	64.44	x	x
P33049	Alpha-S2-casein	198	213	K.TVDQHQKAMKPWTQPK.T		16	1921.98	481.505	4	104.38	23.44	641.672	3	94.07	x	x
P33049	Alpha-S2-casein	198	215	K.TVDQHQKAMKPWTQPKTN.A		18	2137.07	535.278	4	100.78	23.96	535.277	4	39.65	x	x
P33049	Alpha-S2-casein	198	218	K.TVDQHQKAMKPWTQPKTNAIP.Y		21	2418.25	605.572	4	81.64	32.8	605.573	4	29.35	x	x
P33049	Alpha-S2-casein	198	219	K.TVDQHQKAMKPWTQPKTNAIPY.V		22	2581.31	646.338	4	93.68	36.03	646.34	4	52.14	x	x
P33049	Alpha-S2-casein	198	221	K.TVDQHQKAMKPWTQPKTNAIPYVR.Y		24	2836.48	710.131	4	104	35.91	568.304	5	86.54	x	x
P33049	Alpha-S2-casein	198	222	K.TVDQHQKAMKPWTQPKTNAIPYVRY.L		25	2999.54	750.898	4	79.38	39.48	600.921	5	41.47	x	x
P33049	Alpha-S2-casein	198	223	K.TVDQHQKAMKPWTQPKTNAIPYVRYL		26	3112.63	779.17	4	71.19	45.81	779.173	4	97.42	x	x
P33049	Alpha-S2-casein	199	213	T.VDQHQKAMKPWTQPK.T		15	1820.94	456.243	4	92.71	22.71	607.989	3	63.98	x	x
P33049	Alpha-S2-casein	200	213	V.DQHQKAM(+15.99)KPWTQPK.T	Oxidation (M)	14	1737.86	580.293	3	49.77	19.4	580.297	3	25.53		x
P33049	Alpha-S2-casein	200	213	V.DQHQKAMKPWTQPK.T		14	1721.87	574.961	3	73.39	23.21	574.967	3	87.09	x	x
P33049	Alpha-S2-casein	205	215	K.AM(+15.99)KPWTQPKTN.A	Oxidation (M)	11	1316.65	439.892	3	64.59	20.7	439.89	3	45.27		x
P33049	Alpha-S2-casein	205	218	K.AM(+15.99)KPWTQPKTNAIP.Y	Oxidation (M)	14	1597.83	533.619	3	88.39	32.96	799.928	2	59.33	x	x
P33049	Alpha-S2-casein	205	219	K.AM(+15.99)KPWTQPKTNAIPY.V	Oxidation (M)	15	1760.89	587.975	3	75.55	36.86	881.452	2	53.55	x	x
P33049	Alpha-S2-casein	205	220	K.AM(+15.99)KPWTQPKTNAIPYV.R	Oxidation (M)	16	1859.96	620.998	3	64.53	42.1	620.998	3	49.24	x	x
P33049	Alpha-S2-casein	205	221	K.AM(+15.99)KPWTQPKTNAIPYVR.Y	Oxidation (M)	17	2016.06	505.025	4	112.91	36.41	673.032	3	83.14	x	x
P33049	Alpha-S2-casein	205	222	K.AM(+15.99)KPWTQPKTNAIPYVRY.L	Oxidation (M)	18	2179.12	545.792	4	111.46	40.65	727.386	3	61.63	x	x
P33049	Alpha-S2-casein	205	223	K.AM(+15.99)KPWTQPKTNAIPYVRYL	Oxidation (M)	19	2292.21	574.063	4	117.44	47.94	765.078	3	86.13	x	x
P33049	Alpha-S2-casein	205	213	K.AMKPWTQPK.T		9	1085.57	543.794	2	41.31	24.02	362.866	3	65.26	x	x
P33049	Alpha-S2-casein	205	218	K.AMKPWTQPKTNAIP.Y		14	1581.83	528.289	3	81.3	36.46	791.929	2	58.91	x	x
P33049	Alpha-S2-casein	205	219	K.AMKPWTQPKTNAIPY.V		15	1744.9	582.643	3	88.55	40.08	873.458	2	93.08	x	x
P33049	Alpha-S2-casein	205	220	K.AMKPWTQPKTNAIPYV.R		16	1843.97	615.666	3	52.35	45.1	615.662	3	67.78	x	x
P33049	Alpha-S2-casein	205	221	K.AMKPWTQPKTNAIPYVR.Y		17	2000.07	667.701	3	112.51	39.07	667.697	3	99.34	x	x
P33049	Alpha-S2-casein	205	223	K.AMKPWTQPKTNAIPYVRYL		19	2276.21	570.065	4	109.33	50	759.75	3	87.97	x	x
P33049	Alpha-S2-casein	206	213	A.MKPWTQPK.T		8	1014.53	508.272	2	31.48	23.84	508.277	2	50.69	x	x
P33049	Alpha-S2-casein	207	218	M.KPWTQPKTNAIP.Y		12	1379.76	460.929	3	66.4	31.15	690.888	2	46.53	x	x
P33049	Alpha-S2-casein	207	219	M.KPWTQPKTNAIPY.V		13	1542.82	515.283	3	81.78	35.83	772.417	2	60.99	x	x
P33049	Alpha-S2-casein	207	220	M.KPWTQPKTNAIPYV.R		14	1641.89	548.305	3	63.33	41.39	548.32	3	63.05	x	x
P33049	Alpha-S2-casein	207	221	M.KPWTQPKTNAIPYVR.Y		15	1797.99	600.34	3	119.62	35.23	600.338	3	97.2	x	x
P33049	Alpha-S2-casein	207	223	M.KPWTQPKTNAIPYVRYL		17	2074.14	519.544	4	110.5	47.5	692.39	3	91.92	x	x
P33049	Alpha-S2-casein	208	223	K.PWTQPKTNAIPYVRYL		16	1946.04	649.692	3	74.34	51.92	649.688	3	68.26	x
P33049	Alpha-S2-casein	209	216	P.WTQPKTNA.I		8	944.472	473.246	2	55.24	21.7	473.246	2	49.67	x	x
P33049	Alpha-S2-casein	209	218	P.WTQPKTNAIP.Y		10	1154.61	578.314	2	48.34	34.42	578.315	2	53.27	x	x
P33049	Alpha-S2-casein	209	219	P.WTQPKTNAIPY.V		11	1317.67	659.847	2	50.19	38.95	659.845	2	71.06	x	x
P33049	Alpha-S2-casein	209	220	P.WTQPKTNAIPYV.R		12	1416.74	709.382	2	48.82	44.84	709.386	2	73.94	x	x
P33049	Alpha-S2-casein	209	221	P.WTQPKTNAIPYVR.Y		13	1572.84	525.29	3	107.78	37.75	525.295	3	98.53	x	x
P33049	Alpha-S2-casein	209	222	P.WTQPKTNAIPYVRY.L		14	1735.9	579.646	3	109.19	42.56	579.65	3	64.11	x	x
P33049	Alpha-S2-casein	209	223	P.WTQPKTNAIPYVRYL		15	1848.99	617.341	3	91.21	50.83	617.341	3	85.56	x	x
P33049	Alpha-S2-casein	210	218	W.TQPKTNAIP.Y		9	968.529	485.27	2	43.45	22.36	485.271	2	41.82	x	x
P33049	Alpha-S2-casein	210	219	W.TQPKTNAIPY.V		10	1131.59	566.806	2	34.55	29.17	566.806	2	67.17	x	x
P33049	Alpha-S2-casein	210	220	W.TQPKTNAIPYV.R		11	1230.66	616.341	2	31.37	37.39	616.342	2	55.91	x	x
P33049	Alpha-S2-casein	210	223	W.TQPKTNAIPYVRYL		14	1662.91	555.313	3	88.54	46	555.31	3	72.18	x	x
P33049	Alpha-S2-casein	211	223	T.QPKTNAIPYVRYL		13	1561.86	521.63	3	99.27	45.55	521.626	3	59.72	x	x
P33049	Alpha-S2-casein	212	223	Q.PKTNAIPYVRYL		12	1433.8	478.944	3	86.85	45.38	478.948	3	60.44	x
P33049	Alpha-S2-casein	214	221	K.TNAIPYVR.Y		8	932.508	467.264	2	42.39	31.59	467.264	2	74.64	x	x
P33049	Alpha-S2-casein	214	222	K.TNAIPYVRY.L		9	1095.57	548.795	2	44.66	39.75	548.796	2	64.19	x	x
P33049	Alpha-S2-casein	214	223	K.TNAIPYVRYL		10	1208.66	605.339	2	50.01	49.94	605.343	2	83.13	x	x
P33049	Alpha-S2-casein	215	223	T.NAIPYVRYL		9	1107.61	554.814	2	49.56	48.86	554.813	2	64.55	x	x
P33049	Alpha-S2-casein	216	223	N.AIPYVRYL		8	993.565	497.792	2	53.77	48.36	497.791	2	69.1	x	x
P33049	Alpha-S2-casein	217	223	A.IPYVRYL		7	922.528	462.274	2	54.63	45.4	462.274	2	51.78	x	x
P33048	Beta-casein	16	23	A.REQEELNV.V		8	1015.49	508.756	2	31.74	26.32	508.756	2	59.59	x	x
P33048	Beta-casein	16	24	A.REQEELNVV.G		9	1114.56	558.287	2	44.55	30.91	558.298	2	73.56	x	x
P33048	Beta-casein	16	25	A.REQEELNVVG.E		10	1171.58	586.802	2	59.55	29.28	586.807	2	55.57	x	x
P33048	Beta-casein	16	26	A.REQEELNVVGE.T		11	1300.63	651.319	2	44.53	30.95	651.327	2	81.72	x	x
P33048	Beta-casein	16	29	A.REQEELNVVGET(+79.97)VE.S	Phosphorylation (STY)	14	1709.75	855.887	2	28.74	40.59	855.894	2	79.64	x	x
P33048	Beta-casein	16	27	A.REQEELNVVGET.V		12	1401.67	701.847	2	36.5	32.28	701.848	2	79.17	x	x
P33048	Beta-casein	16	43	A.REQEELNVVGETVESLS(+79.97)SS(+79.97)EESITHINK.K	Phosphorylation (STY)	28	3302.46	826.63	4	68.4	53.53	1101.84	3	28.24		x
P33048	Beta-casein	16	43	A.REQEELNVVGETVESLSS(+79.97)SEESITHINK.K	Phosphorylation (STY)	28	3222.49	806.637	4	86.61	59.23	806.636	4	105.9	x	x
P33048	Beta-casein	16	43	A.REQEELNVVGETVESLSSS(+79.97)EESITHINK.K	Phosphorylation (STY)	28	3222.49	806.638	4	83.82	53.51	806.632	4	101.63	x	x
P33048	Beta-casein	16	43	A.REQEELNVVGETVESLSSSEESITHINK.K		28	3142.53	786.646	4	111.59	59.18	786.64	4	111.33	x	x
P33048	Beta-casein	17	24	R.EQEELNVV.G		8	958.461	480.24	2	66.56	36.22	480.238	2	72.36	x	x
P33048	Beta-casein	34	43	S.S(+79.97)EESITHINK.K	Phosphorylation (STY)	10	1236.54	619.28	2	33.41	24.27	619.28	2	72.05	x	x
P33048	Beta-casein	44	57	K.KIEKFQS(+79.97)EEQQQTE.D	Phosphorylation (STY)	14	1830.8	611.274	3	44.16	24.31	611.282	3	38.8	x	x
P33048	Beta-casein	44	63	K.KIEKFQS(+79.97)EEQQQTEDELQDK.I	Phosphorylation (STY)	20	2559.14	640.796	4	111.47	32.68	854.068	3	106.08	x	x
P33048	Beta-casein	44	65	K.KIEKFQS(+79.97)EEQQQTEDELQDKIH.P	Phosphorylation (STY)	22	2809.28	703.332	4	89.09	36.85	703.333	4	28.49	x
P33048	Beta-casein	44	67	K.KIEKFQS(+79.97)EEQQQTEDELQDKIHPF.A	Phosphorylation (STY)	24	3053.4	764.364	4	81.79	45.44	764.365	4	91.27	x	x
P33048	Beta-casein	44	69	K.KIEKFQS(+79.97)EEQQQTEDELQDKIHPFAQ.A	Phosphorylation (STY)	26	3252.5	814.137	4	71.8	44.73	814.133	4	93.65	x	x
P33048	Beta-casein	44	70	K.KIEKFQS(+79.97)EEQQQTEDELQDKIHPFAQA.Q	Phosphorylation (STY)	27	3323.53	831.898	4	82.19	45.37	831.895	4	99.77	x	x
P33048	Beta-casein	44	63	K.KIEKFQSEEQQQTEDELQDK.I		20	2479.17	620.804	4	143.42	30.3	620.806	4	110.02	x	x
P33048	Beta-casein	45	63	K.IEKFQS(+79.97)EEQQQTEDELQDK.I	Phosphorylation (STY)	19	2431.04	811.36	3	58.15	35.08	811.366	3	84.75	x	x
P33048	Beta-casein	45	63	K.IEKFQSEEQQQTEDELQDK.I		19	2351.08	784.705	3	89.24	32.39	784.705	3	102.7	x	x
P33048	Beta-casein	47	63	E.KFQS(+79.97)EEQQQTEDELQDK.I	Phosphorylation (STY)	17	2188.92	730.651	3	59.88	31.78	730.654	3	86.02	x	x
P33048	Beta-casein	47	63	E.KFQSEEQQQTEDELQDK.I		17	2108.95	703.99	3	101.23	27.91	704	3	89.65	x	x
P33048	Beta-casein	48	63	K.FQS(+79.97)EEQQQTEDELQDK.I	Phosphorylation (STY)	16	2060.82	687.952	3	93.11	33.76	1031.42	2	118.9	x	x
P33048	Beta-casein	48	63	K.FQSEEQQQTEDELQDK.I		16	1980.85	661.295	3	123.57	30.45	991.435	2	106.85	x	x
P33048	Beta-casein	57	67	T.EDELQDKIHPF.A		11	1369.65	457.56	3	67.51	40.55	457.556	3	28.95		x
P33048	Beta-casein	92	112	P.LTQTPVVVPPFLQPEIM(+15.99)GVPK.V	Oxidation (M)	21	2305.28	769.439	3	65.72	61.67	769.437	3	76.9	x	x
P33048	Beta-casein	92	112	P.LTQTPVVVPPFLQPEIMGVPK.V		21	2289.28	764.106	3	57.26	66.03	764.102	3	91.46	x	x
P33048	Beta-casein	92	120	P.LTQTPVVVPPFLQPEIMGVPKVKETMVPK.H		29	3201.79	801.46	4	57.94	61.11	801.458	4	65.47	x	x
P33048	Beta-casein	93	112	L.TQTPVVVPPFLQPEIMGVPK.V		20	2176.2	726.412	3	54.76	64.57	726.408	3	101.58	x	x
P33048	Beta-casein	98	112	V.VVPPFLQPEIM(+15.99)GVPK.V	Oxidation (M)	15	1665.92	556.316	3	49.45	53.18	833.962	2	51.66	x	x
P33048	Beta-casein	98	114	V.VVPPFLQPEIM(+15.99)GVPKVK.E	Oxidation (M)	17	1893.08	632.037	3	56.09	51.19	632.034	3	28.81	x
P33048	Beta-casein	98	116	V.VVPPFLQPEIM(+15.99)GVPKVKET.M	Oxidation (M)	19	2123.17	708.734	3	78.07	50.91	708.733	3	49.31	x	x
P33048	Beta-casein	98	120	V.VVPPFLQPEIM(+15.99)GVPKVKETMVPK.H	Oxidation (M)	23	2578.43	645.618	4	70.37	51.72	645.618	4	38.61	x	x
P33048	Beta-casein	98	112	V.VVPPFLQPEIMGVPK.V		15	1649.92	550.984	3	47.41	58.48	550.981	3	82.95	x	x
P33048	Beta-casein	98	116	V.VVPPFLQPEIMGVPKVKET.M		19	2107.18	703.403	3	70.24	55.26	703.401	3	72.69	x	x
P33048	Beta-casein	98	120	V.VVPPFLQPEIMGVPKVKETM(+15.99)VPK.H	Oxidation (M)	23	2578.43	645.619	4	60.46	52.32	645.618	4	28.51		x
P33048	Beta-casein	98	120	V.VVPPFLQPEIMGVPKVKETMVPK.H		23	2562.43	641.619	4	114.64	55.24	641.615	4	59.56	x	x
P33048	Beta-casein	99	112	V.VPPFLQPEIMGVPK.V		14	1550.85	776.44	2	34.68	55.6	776.436	2	97.23	x	x
P33048	Beta-casein	109	120	M.GVPKVKETMVPK.H		12	1311.76	438.259	3	87.74	25.74	438.257	3	51.05	x	x
P33048	Beta-casein	113	128	K.VKETM(+15.99)VPKHKEM(+15.99)PFPK.Y	Oxidation (M)	16	1957.02	490.264	4	68.57	20.69	490.262	4	45.99	x	x
P33048	Beta-casein	113	128	K.VKETM(+15.99)VPKHKEMPFPK.Y	Oxidation (M)	16	1941.02	486.264	4	76.58	25.32	486.267	4	81.25	x	x
P33048	Beta-casein	113	128	K.VKETMVPKHKEM(+15.99)PFPK.Y	Oxidation (M)	16	1941.02	486.264	4	100.3	23.19	486.264	4	62.2	x	x
P33048	Beta-casein	113	128	K.VKETMVPKHKEMPFPK.Y		16	1925.03	482.266	4	96.85	28.17	482.269	4	93.9	x	x
P33048	Beta-casein	115	128	K.ETM(+15.99)VPKHKEM(+15.99)PFPK.Y	Oxidation (M)	14	1729.85	433.473	4	64.8	20.79	433.477	4	31.79		x
P33048	Beta-casein	121	147	K.HKEMPFPKYPVEPFTESQSLTLTDVEK.L		27	3176.57	795.156	4	59.78	51.42	795.155	4	96.6		x
P33048	Beta-casein	121	153	K.HKEMPFPKYPVEPFTESQSLTLTDVEKLHLPLP.L		33	3846.99	770.411	5	57.14	64.35	770.409	5	41.78		x
P33048	Beta-casein	123	153	K.EM(+15.99)PFPKYPVEPFTESQSLTLTDVEKLHLPLP.L	Oxidation (M)	31	3597.83	900.473	4	42.85	67.89	900.476	4	39.48		x
P33048	Beta-casein	123	153	K.EMPFPKYPVEPFTESQSLTLTDVEKLHLPLP.L		31	3581.84	896.472	4	61.53	69.86	896.476	4	68.03		x
P33048	Beta-casein	141	169	L.TLTDVEKLHLPLPLVQSWMHQPPQPLSPT.V		29	3301.75	826.452	4	34.74	66	826.454	4	59.7		x
P33048	Beta-casein	158	169	S.WMHQPPQPLSPT.V		12	1417.68	709.851	2	31.99	37.34	709.847	2	66.81	x
P33048	Beta-casein	178	202	V.LSLSQPKVLPVPQKAVPQRDMPIQA.F		25	2739.55	685.898	4	64.62	46.25	685.898	4	56.17	x	x
P33048	Beta-casein	178	203	V.LSLSQPKVLPVPQKAVPQRDMPIQAF.L		26	2886.62	722.666	4	72.17	51.54	722.666	4	35.65	x
P33048	Beta-casein	179	190	L.SLSQPKVLPVPQ.K		12	1291.75	646.885	2	36.63	38.84	646.885	2	71.15	x
P33048	Beta-casein	179	191	L.SLSQPKVLPVPQK.A		13	1419.84	474.291	3	62.27	33.1	474.287	3	63.66	x
P33048	Beta-casein	179	195	L.SLSQPKVLPVPQKAVPQ.R		17	1815.06	606.032	3	70.08	37.46	606.03	3	89.28	x
P33048	Beta-casein	179	197	L.SLSQPKVLPVPQKAVPQRD.M		19	2086.19	522.557	4	115.74	34.36	522.559	4	71.41	x	x
P33048	Beta-casein	179	201	L.SLSQPKVLPVPQKAVPQRDM(+15.99)PIQ.A	Oxidation (M)	23	2571.42	643.866	4	71.29	37.39	643.864	4	40.9	x	x
P33048	Beta-casein	179	201	L.SLSQPKVLPVPQKAVPQRDMPIQ.A		23	2555.43	639.867	4	114.09	41.38	639.87	4	55.52	x
P33048	Beta-casein	179	203	L.SLSQPKVLPVPQKAVPQRDMPIQAF.L		25	2773.53	694.394	4	81.38	48.25	694.394	4	27.03	x
P33048	Beta-casein	180	201	S.LSQPKVLPVPQKAVPQRDMPIQ.A		22	2468.39	618.11	4	74.63	40.77	618.109	4	44.84	x
P33048	Beta-casein	181	195	L.SQPKVLPVPQKAVPQ.R		15	1614.95	539.325	3	62.53	32.64	539.324	3	54.72	x
P33048	Beta-casein	181	201	L.SQPKVLPVPQKAVPQRDM(+15.99)PIQ.A	Oxidation (M)	21	2371.3	593.836	4	81.22	33.83	593.833	4	34.69	x	x
P33048	Beta-casein	185	201	K.VLPVPQKAVPQRDM(+15.99)PIQ.A	Oxidation (M)	17	1931.07	644.699	3	62.87	34.61	644.7	3	42.34	x	x
P33048	Beta-casein	185	202	K.VLPVPQKAVPQRDM(+15.99)PIQA.F	Oxidation (M)	18	2002.1	668.378	3	80.9	36.36	668.38	3	53.66	x	x
P33048	Beta-casein	185	203	K.VLPVPQKAVPQRDM(+15.99)PIQAF.L	Oxidation (M)	19	2149.17	717.404	3	54.36	43.53	717.403	3	67.07	x	x
P33048	Beta-casein	185	204	K.VLPVPQKAVPQRDM(+15.99)PIQAFL.L	Oxidation (M)	20	2262.26	755.097	3	45.56	50.75	755.098	3	51.54	x	x
P33048	Beta-casein	185	220	K.VLPVPQKAVPQRDM(+15.99)PIQAFLLYQEPVLGPVRGPFPI.L	Oxidation (M)	36	4025.23	806.059	5	64.96	68.39	1007.32	4	87.35	x	x
P33048	Beta-casein	185	221	K.VLPVPQKAVPQRDM(+15.99)PIQAFLLYQEPVLGPVRGPFPIL.V	Oxidation (M)	37	4138.32	828.674	5	52.57	71.41	1035.58	4	78.99	x	x
P33048	Beta-casein	185	222	K.VLPVPQKAVPQRDM(+15.99)PIQAFLLYQEPVLGPVRGPFPILV	Oxidation (M)	38	4237.39	848.491	5	31.21	72.4	1060.36	4	62.18		x
P33048	Beta-casein	185	199	K.VLPVPQKAVPQRDMP.I		15	1673.93	558.986	3	88.3	36.92	558.989	3	48.23	x	x
P33048	Beta-casein	185	201	K.VLPVPQKAVPQRDMPIQ.A		17	1915.07	639.368	3	59.47	39.43	639.37	3	65.74	x	x
P33048	Beta-casein	185	202	K.VLPVPQKAVPQRDMPIQA.F		18	1986.11	663.048	3	69.8	40.93	663.047	3	66.97	x	x
P33048	Beta-casein	185	203	K.VLPVPQKAVPQRDMPIQAF.L		19	2133.18	712.071	3	68	48.06	712.072	3	65.63	x	x
P33048	Beta-casein	185	204	K.VLPVPQKAVPQRDMPIQAFL.L		20	2246.26	749.767	3	37.82	55.84	749.764	3	66.88	x	x
P33048	Beta-casein	185	214	K.VLPVPQKAVPQRDMPIQAFLLYQEPVLGPV.R		30	3341.86	836.477	4	33.9	67.65	836.473	4	71.77	x	x
P33048	Beta-casein	185	217	K.VLPVPQKAVPQRDMPIQAFLLYQEPVLGPVRGP.F		33	3652.03	914.021	4	32.45	63.3	914.017	4	70.69	x
P33048	Beta-casein	185	220	K.VLPVPQKAVPQRDMPIQAFLLYQEPVLGPVRGPFPI.L		36	4009.24	802.86	5	54.2	71.2	1003.32	4	87.37	x	x
P33048	Beta-casein	185	221	K.VLPVPQKAVPQRDMPIQAFLLYQEPVLGPVRGPFPIL.V		37	4122.32	825.473	5	43.25	73.6	1031.59	4	93.41		x
P33048	Beta-casein	185	222	K.VLPVPQKAVPQRDMPIQAFLLYQEPVLGPVRGPFPILV		38	4221.39	845.291	5	41.49	74.79	1056.36	4	67.67		x
P33048	Beta-casein	186	203	V.LPVPQKAVPQRDMPIQAF.L		18	2034.11	679.048	3	62.5	46.31	679.05	3	34.21	x
P33048	Beta-casein	192	202	K.AVPQRDM(+15.99)PIQA.F	Oxidation (M)	11	1240.62	621.322	2	37.91	24.93	621.323	2	51.56	x	x
P33048	Beta-casein	192	203	K.AVPQRDM(+15.99)PIQAF.L	Oxidation (M)	12	1387.69	694.857	2	45.97	36.56	694.86	2	34.44	x
P33048	Beta-casein	192	220	K.AVPQRDM(+15.99)PIQAFLLYQEPVLGPVRGPFPI.L	Oxidation (M)	29	3263.75	816.951	4	73.93	70.72	1088.93	3	112.34	x	x
P33048	Beta-casein	192	221	K.AVPQRDM(+15.99)PIQAFLLYQEPVLGPVRGPFPIL.V	Oxidation (M)	30	3376.84	845.222	4	69.96	73.8	1126.62	3	101.57	x	x
P33048	Beta-casein	192	222	K.AVPQRDM(+15.99)PIQAFLLYQEPVLGPVRGPFPILV	Oxidation (M)	31	3475.91	869.99	4	64.2	74.9	1159.65	3	99.42	x	x
P33048	Beta-casein	192	204	K.AVPQRDMPIQAFL.L		13	1484.78	743.403	2	32.52	55.32	743.394	2	68.7	x
P33048	Beta-casein	192	219	K.AVPQRDMPIQAFLLYQEPVLGPVRGPFP.I		28	3134.67	784.682	4	43.61	69.94	1045.91	3	91.94	x	x
P33048	Beta-casein	192	220	K.AVPQRDMPIQAFLLYQEPVLGPVRGPFPI.L		29	3247.76	812.953	4	66.09	73.33	1083.6	3	106.42	x	x
P33048	Beta-casein	192	221	K.AVPQRDMPIQAFLLYQEPVLGPVRGPFPIL.V		30	3360.84	841.224	4	71.58	76.21	1121.3	3	106.9	x	x
P33048	Beta-casein	192	222	K.AVPQRDMPIQAFLLYQEPVLGPVRGPFPILV		31	3459.91	865.992	4	49.36	77.39	1154.32	3	92.52		x
P33048	Beta-casein	195	202	P.QRDMPIQA.F		8	957.47	479.744	2	35.64	26.76	479.744	2	35.2	x
P33048	Beta-casein	203	220	A.FLLYQEPVLGPVRGPFPI.L		18	2041.14	681.392	3	52.99	69.42	1021.58	2	76.35	x
P33048	Beta-casein	203	221	A.FLLYQEPVLGPVRGPFPIL.V		19	2154.22	719.086	3	59.83	73.56	1078.12	2	80.17	x	x
P33048	Beta-casein	203	222	A.FLLYQEPVLGPVRGPFPILV		20	2253.29	752.11	3	51.05	75.33	1127.66	2	79.94	x	x
P33048	Beta-casein	204	220	F.LLYQEPVLGPVRGPFPI.L		17	1894.07	632.368	3	51.92	63.54	948.049	2	118.5	x	x
P33048	Beta-casein	204	221	F.LLYQEPVLGPVRGPFPIL.V		18	2007.16	670.064	3	52.17	68.15	1004.59	2	125.43	x	x
P33048	Beta-casein	204	222	F.LLYQEPVLGPVRGPFPILV		19	2106.22	703.086	3	64.54	70.19	1054.12	2	113.34	x	x
P33048	Beta-casein	205	220	L.LYQEPVLGPVRGPFPI.L		16	1780.99	891.508	2	38.06	59.74	891.503	2	99.66	x	x
P33048	Beta-casein	205	221	L.LYQEPVLGPVRGPFPIL.V		17	1894.07	632.368	3	53.82	64.96	948.052	2	116.68	x	x
P33048	Beta-casein	205	222	L.LYQEPVLGPVRGPFPILV		18	1993.14	665.391	3	63.17	67.23	997.584	2	124.18	x	x
P33048	Beta-casein	206	215	L.YQEPVLGPVR.G		10	1156.62	579.322	2	33.33	35.59	579.32	2	92.05	x	x
P33048	Beta-casein	206	219	L.YQEPVLGPVRGPFP.I		14	1554.82	778.422	2	35.09	51.25	778.419	2	95.22	x
P33048	Beta-casein	206	220	L.YQEPVLGPVRGPFPI.L		15	1667.9	556.978	3	67.58	57.98	834.963	2	107.6	x	x
P33048	Beta-casein	206	221	L.YQEPVLGPVRGPFPIL.V		16	1780.99	594.673	3	61.12	63.14	891.506	2	98.68	x	x
P33048	Beta-casein	206	222	L.YQEPVLGPVRGPFPILV		17	1880.06	627.696	3	71.77	65.53	941.038	2	103.09	x	x
P33048	Beta-casein	207	221	Y.QEPVLGPVRGPFPIL.V		15	1617.92	540.318	3	56.93	61.49	809.976	2	112.01	x	x
P33048	Beta-casein	207	222	Y.QEPVLGPVRGPFPILV		16	1716.99	573.341	3	71.44	64.02	859.513	2	118.43	x	x
P33048	Beta-casein	208	220	Q.EPVLGPVRGPFPI.L		13	1376.78	689.402	2	28.81	55.97	689.407	2	95.33	x	x
P33048	Beta-casein	208	221	Q.EPVLGPVRGPFPIL.V		14	1489.87	745.944	2	32.3	61.82	745.945	2	100.03	x	x
P33048	Beta-casein	208	222	Q.EPVLGPVRGPFPILV		15	1588.93	795.479	2	44.23	64.33	795.478	2	103.99	x	x
P33048	Beta-casein	209	220	E.PVLGPVRGPFPI.L		12	1247.74	624.881	2	55.25	54.97	624.884	2	59.53	x	x
P33048	Beta-casein	209	221	E.PVLGPVRGPFPIL.V		13	1360.82	681.423	2	44.26	61.11	681.426	2	78.66	x
P33048	Beta-casein	209	222	E.PVLGPVRGPFPILV		14	1459.89	730.957	2	53.12	63.85	730.958	2	92.24	x	x
P33048	Beta-casein	210	219	P.VLGPVRGPFP.I		10	1037.6	519.811	2	41.79	43.83	519.812	2	68.83	x	x
P33048	Beta-casein	210	220	P.VLGPVRGPFPI.L		11	1150.69	576.353	2	44.23	52.13	576.357	2	77.04	x	x
P33048	Beta-casein	210	221	P.VLGPVRGPFPIL.V		12	1263.77	632.896	2	32.88	58.74	632.898	2	77.08	x	x
P33048	Beta-casein	210	222	P.VLGPVRGPFPILV		13	1362.84	682.431	2	33.4	61.48	682.427	2	79.63	x	x
P33048	Beta-casein	211	220	V.LGPVRGPFPI.L		10	1051.62	526.819	2	34.69	50.07	526.819	2	67.4	x	x
P33048	Beta-casein	211	221	V.LGPVRGPFPIL.V		11	1164.7	583.361	2	43.88	56.98	583.365	2	68.07	x	x
P33048	Beta-casein	212	220	L.GPVRGPFPI.L		9	938.534	470.276	2	42.95	43.84	470.277	2	68.59	x	x
P33048	Beta-casein	212	221	L.GPVRGPFPIL.V		10	1051.62	526.819	2	41.4	51.96	526.821	2	66.8	x	x
P33048	Beta-casein	212	222	L.GPVRGPFPILV		11	1150.69	576.354	2	43.94	55.65	576.355	2	73.65	x	x
P33048	Beta-casein	213	221	G.PVRGPFPIL.V		9	994.596	498.308	2	40.22	51.5	498.307	2	63.27	x
P33048	Beta-casein	213	222	G.PVRGPFPILV		10	1093.66	547.842	2	39.73	55.51	547.846	2	75.84	x	x
P33048	Beta-casein	214	222	P.VRGPFPILV		9	996.612	499.316	2	37.1	54.27	499.314	2	49.64	x	x
P33048	Beta-casein	215	222	V.RGPFPILV		8	897.544	449.781	2	31.91	51.9	449.784	2	42.59	x	x
P02756	Beta-lactoglobulin	19	26	A.IIVTQTMK.G		8	932.537	467.277	2	43.97	27.06	467.276	2	50.6	x	x
P02756	Kappa-casein	19	38	A.IIVTQTMKGLDIQKVAGTWY.S		20	2264.22	755.753	3	43.33	57.67	755.752	3	99.07	x	x
P82018	Cathelicidin-2	56	78	Y.RLLELDPAPNDEVDPGTRKPVSF.T		23	2564.32	642.092	4	72.99	46.49	642.09	4	98.54	x	x
P68215	Fibrinogen alpha chain (Fragment)	1	19	ADDSDPVGGEFLAEGGGVR		19	1846.83	616.617	3	49.46	44.45	924.432	2	116.47	x	x
P81447	Glycosylation-dependent cell adhesion molecule 1	19	28	A.ILNEPEDETH.L		10	1195.54	598.778	2	34.22	24.12	598.776	2	59.89	x
P81447	Glycosylation-dependent cell adhesion molecule 1	19	40	A.ILNEPEDETHLEAQPTDASAQF.I		22	2454.12	819.053	3	42.94	44.16	1228.07	2	111.5	x	x
P81447	Glycosylation-dependent cell adhesion molecule 1	73	92	R.SPRQPQNQNPKLPLSILKEK.Q		20	2314.31	579.584	4	78.45	37.63	579.587	4	76.54	x	x
P81447	Glycosylation-dependent cell adhesion molecule 1	75	91	P.RQPQNQNPKLPLSILKE.K		17	2002.13	501.542	4	89.26	41.88	668.39	3	33.31	x
P81447	Glycosylation-dependent cell adhesion molecule 1	75	92	P.RQPQNQNPKLPLSILKEK.Q		18	2130.23	533.566	4	108.04	37.39	533.57	4	107.78	x	x
P81447	Glycosylation-dependent cell adhesion molecule 1	75	94	P.RQPQNQNPKLPLSILKEKQL.R		20	2371.37	593.852	4	108.12	42.29	593.858	4	95.82	x	x
P81447	Glycosylation-dependent cell adhesion molecule 1	76	92	R.QPQNQNPKLPLSILKEK.Q		17	1974.13	494.541	4	75.28	40.08	494.54	4	65.66		x
P81447	Glycosylation-dependent cell adhesion molecule 1	76	94	R.QPQNQNPKLPLSILKEKQL.R		19	2215.27	554.828	4	100.22	45.15	554.829	4	42.53	x	x
P81447	Glycosylation-dependent cell adhesion molecule 1	78	92	P.QNQNPKLPLSILKEK.Q		15	1749.01	438.263	4	87.88	39.55	438.264	4	84.18	x	x
P81447	Glycosylation-dependent cell adhesion molecule 1	78	94	P.QNQNPKLPLSILKEKQL.R		17	1990.16	498.55	4	88.07	44.58	498.55	4	83.74	x	x
P81447	Glycosylation-dependent cell adhesion molecule 1	79	92	Q.NQNPKLPLSILKEK.Q		14	1620.96	541.328	3	71.69	39.59	541.332	3	43.09	x
P81447	Glycosylation-dependent cell adhesion molecule 1	87	94	L.SILKEKQL.R		8	957.586	479.802	2	40.86	26.13	479.801	2	51.93	x	x
P02670	Kappa-casein	33	45	C.EKDERFFDDKIAK.Y		13	1639.82	410.964	4	93.25	29.27	410.965	4	36.62	x	x
P02670	Kappa-casein	38	44	R.FFDDKIA.K		7	854.417	428.218	2	49.06	37.04	428.217	2	59.95		x
P02670	Kappa-casein	38	45	R.FFDDKIAK.Y		8	982.512	492.266	2	48.7	29.66	492.264	2	63.23	x	x
P02670	Kappa-casein	70	88	V.ALINNQFLPYPYYAKPVAV.R		19	2180.17	727.735	3	42.78	60	727.736	3	58.11	x
P02670	Kappa-casein	147	160	I.ASAEPTVHSTPTTE.A		14	1426.66	714.335	2	39.08	22.47	714.336	2	71.2	x	x
P02670	Kappa-casein	148	160	A.SAEPTVHSTPTTE.A		13	1355.62	678.821	2	32.26	22.21	678.826	2	69.29	x
P02670	Kappa-casein	184	192	N.TAQVTS(+79.97)TEV	Phosphorylation (STY)	9	1014.43	508.223	2	40.49	27.74	508.221	2	42.28	x	x
A0A452E9Y6	Lactoperoxidase	23	42	S.DTIAQAASTTTISDAVSKVK.T		20	2006.05	669.696	3	39.33	45.5	669.698	3	120.3	x	x
A0A452E9Y6	Lactoperoxidase	23	47	S.DTIAQAASTTTISDAVSKVKTQVNK.A		25	2576.37	645.098	4	55.33	47.77	645.103	4	116.69	x	x
A0A452E9Y6	Lactoperoxidase	23	53	S.DTIAQAASTTTISDAVSKVKTQVNKAFLDSR.T		31	3265.72	654.155	5	55.01	60.85	654.153	5	93.38		x
A0A452E9Y6	Lactoperoxidase	48	68	K.AFLDSRTRLKTALSSEAPTTR.Q		21	2320.25	581.073	4	126.61	38.15	581.074	4	62.34	x	x
A0A452E9Y6	Lactoperoxidase	54	68	R.TRLKTALS(+79.97)SEAPTTR.Q	Phosphorylation (STY)	15	1710.87	571.298	3	92.47	27.27	571.3	3	89.33	x	x
A0A452E9Y6	Lactoperoxidase	54	68	R.TRLKTALSSEAPTTR.Q		15	1630.9	544.643	3	108.99	25.33	544.645	3	93.41	x	x
A0A452E9Y6	Lactoperoxidase	55	68	T.RLKTALS(+79.97)SEAPTTR.Q	Phosphorylation (STY)	14	1609.82	537.616	3	86.3	26.28	537.62	3	61.53	x	x
A0A452E9Y6	Lactoperoxidase	55	68	T.RLKTALSSEAPTTR.Q		14	1529.85	510.956	3	87.95	23.21	510.963	3	76.74	x	x
A0A452E9Y6	Lactoperoxidase	56	68	R.LKTALSSEAPTTR.Q		13	1373.75	458.926	3	83.84	25.48	458.925	3	89.17	x	x
A0A452E9Y6	Lactoperoxidase	58	68	K.TALS(+79.97)SEAPTTR.Q	Phosphorylation (STY)	11	1212.54	607.279	2	34.3	25.77	607.283	2	70.82	x	x
A0A452E9Y6	Lactoperoxidase	58	68	K.TALSSEAPTTR.Q		11	1132.57	567.296	2	46.97	22.84	567.295	2	77.56	x	x
A0A452E9Y6	Lactoperoxidase	59	68	T.ALS(+79.97)SEAPTTR.Q	Phosphorylation (STY)	10	1111.49	556.755	2	44.66	23.5	556.756	2	48.99	x	x
A0A452E9Y6	Lactoperoxidase	62	75	S.SEAPTTRQLSEYFK.H		14	1655.82	552.948	3	89.49	40.79	552.948	3	31.81	x	x
A0A452E9Y6	Lactoperoxidase	69	81	R.QLSEYFKHAKGRT.R		13	1563.82	522.278	3	87.19	25.82	391.964	4	69.83	x	x
A0A452E9Y6	Lactoperoxidase	81	96	R.TRTAIRNGQVWEESLK.R		16	1887	472.758	4	135.91	33.24	472.761	4	65.99	x	x
A0A452E9Y6	Lactoperoxidase	81	98	R.TRTAIRNGQVWEESLKRL.R		18	2156.18	540.056	4	123.13	41.62	540.06	4	84.11	x	x
A0A452E9Y6	Lactoperoxidase	82	98	T.RTAIRNGQVWEESLKRL.R		17	2055.13	514.792	4	112.52	40.95	514.79	4	65.53	x	x
A0A452E9Y6	Lactoperoxidase	83	96	R.TAIRNGQVWEESLK.R		14	1629.85	544.293	3	120.93	35.88	544.297	3	95.65	x	x
A0A452E9Y6	Lactoperoxidase	83	98	R.TAIRNGQVWEESLKRL.R		16	1899.03	475.765	4	113.46	44.09	634.021	3	103.15	x	x
A0A452E9Y6	Lactoperoxidase	83	99	R.TAIRNGQVWEESLKRLR.R		17	2055.13	514.793	4	99	40.14	514.793	4	47.01	x	x
A0A452E9Y6	Lactoperoxidase	84	96	T.AIRNGQVWEESLK.R		13	1528.8	510.608	3	108.97	34.91	510.608	3	87.21	x
A0A452E9Y6	Lactoperoxidase	84	98	T.AIRNGQVWEESLKRL.R		15	1797.98	450.506	4	125.8	43.36	600.341	3	90.74	x	x
A0A452E9Y6	Lactoperoxidase	85	96	A.IRNGQVWEESLK.R		12	1457.76	486.93	3	109.98	33.84	486.929	3	86.57	x	x
A0A452E9Y6	Lactoperoxidase	85	98	A.IRNGQVWEESLKRL.R		14	1726.95	432.747	4	100.89	42.89	576.657	3	74.54	x	x
A0A452E9Y6	Lactoperoxidase	86	98	I.RNGQVWEESLKRL.R		13	1613.86	538.965	3	114.62	40.46	538.963	3	99.19	x	x
A0A452E9Y6	Lactoperoxidase	87	96	R.NGQVWEESLK.R		10	1188.58	595.3	2	42.11	35.87	595.3	2	86.75	x	x
A0A452E9Y6	Lactoperoxidase	87	98	R.NGQVWEESLKRL.R		12	1457.76	486.93	3	89.96	45.13	486.93	3	82.48	x	x
A0A452E9Y6	Lactoperoxidase	88	96	N.GQVWEESLK.R		9	1074.53	538.277	2	52.71	35.6	538.28	2	73.47	x	x
A0A452E9Y6	Lactoperoxidase	88	98	N.GQVWEESLKRL.R		11	1343.72	448.917	3	95.67	44.45	672.871	2	85.15	x	x
A0A452E9Y6	Lactoperoxidase	89	96	G.QVWEESLK.R		8	1017.51	509.766	2	61.05	33.68	509.765	2	64.38	x	x
A0A452E9Y6	Lactoperoxidase	89	98	G.QVWEESLKRL.R		10	1286.7	429.909	3	85.37	42.31	429.91	3	58.34	x	x
A0A452E9Y6	Lactoperoxidase	90	96	Q.VWEESLK.R		7	889.455	445.737	2	61.7	30.21	445.736	2	57.13	x	x
A0A452E9Y6	Lactoperoxidase	90	98	Q.VWEESLKRL.R		9	1158.64	580.33	2	51.36	44.5	580.33	2	63.43	x	x
A0A452E9Y6	Lactoperoxidase	91	98	V.WEESLKRL.R		8	1059.57	530.795	2	51.52	34.49	530.794	2	66.44	x	x
*Start and End position as given by the PEAKS output (including the signal peptides of proteins)

## Sheet: Table S5 Cow IF
Table S5: List of peptides in powdered cow milk based IF (P1 and P2) and liquid cow milk based IF (L1 and L2) identified by ETD and CID. An 'x' indicates that the peptide was identified in the brand.
Accession	Protein	Start*	End*	Peptide	Modification	Length	Mass	m/z (ETD)	z (ETD)	-10lgP (ETD)	Retention time (ETD)	m/z (CID)	z (CID)	-10lgP (CID)	P1	P2	L1	L2
P02662	Alpha-S1-casein	16	28	A.RPKHPIKHQGLPQ.E		13	1534.88	512.635	3	55.96	17.33	512.638	3	60.71	x	x	x	x
P02662	Alpha-S1-casein	16	29	A.RPKHPIKHQGLPQE.V		14	1663.93	416.989	4	71.03	19.72	555.651	3	63.46	x	x	x	x
P02662	Alpha-S1-casein	16	30	A.RPKHPIKHQGLPQEV.L		15	1763	441.756	4	65.08	23.33	441.753	4	42.42	x	x		x
P02662	Alpha-S1-casein	16	31	A.RPKHPIKHQGLPQEVL.N		16	1876.08	470.028	4	58.83	28.71	626.37	3	63.03	x	x	x	x
P02662	Alpha-S1-casein	16	32	A.RPKHPIKHQGLPQEVLN.E		17	1990.12	498.539	4	63.74	26.47	498.546	4	73.96	x	x	x	x
P02662	Alpha-S1-casein	16	33	A.RPKHPIKHQGLPQEVLNE.N		18	2119.16	530.799	4	53.89	30.31	530.806	4	53.63	x	x		x
P02662	Alpha-S1-casein	16	34	A.RPKHPIKHQGLPQEVLNEN.L		19	2233.21	559.311	4	54.19	28.68	559.313	4	56.72	x	x	x	x
P02662	Alpha-S1-casein	16	35	A.RPKHPIKHQGLPQEVLNENL.L		20	2346.29	470.265	5	61.51	36.8	587.586	4	66	x	x	x	x
P02662	Alpha-S1-casein	16	36	A.RPKHPIKHQGLPQEVLNENLL.R		21	2459.38	492.885	5	73.9	41.69	820.804	3	72.68	x	x	x	x
P02662	Alpha-S1-casein	16	37	A.RPKHPIKHQGLPQEVLNENLLR.F		22	2615.48	524.105	5	89.86	38.31	524.107	5	81.05	x	x		x
P02662	Alpha-S1-casein	16	38	A.RPKHPIKHQGLPQEVLNENLLRF.F		23	2762.55	691.644	4	101.28	48.32	691.644	4	79.89	x	x	x	x
P02662	Alpha-S1-casein	18	29	P.KHPIKHQGLPQE.V		12	1410.77	471.266	3	51.2	17.19	471.268	3	42.01	x		x	x
P02662	Alpha-S1-casein	18	30	P.KHPIKHQGLPQEV.L		13	1509.84	504.288	3	34.97	22.4	504.291	3	31.85			x	x
P02662	Alpha-S1-casein	18	31	P.KHPIKHQGLPQEVL.N		14	1622.93	406.739	4	77.14	28.39	541.985	3	48.85	x	x	x	x
P02662	Alpha-S1-casein	18	32	P.KHPIKHQGLPQEVLN.E		15	1736.97	435.251	4	73.29	26.76	580.005	3	53.34	x	x	x	x
P02662	Alpha-S1-casein	18	34	P.KHPIKHQGLPQEVLNEN.L		17	1980.05	496.021	4	36.16	28.53	496.02	4	59.73			x	x
P02662	Alpha-S1-casein	18	35	P.KHPIKHQGLPQEVLNENL.L		18	2093.14	524.294	4	57.27	37.11	524.295	4	53.19			x	x
P02662	Alpha-S1-casein	18	36	P.KHPIKHQGLPQEVLNENLL.R		19	2206.22	552.566	4	53.85	43.13	736.419	3	57.44			x	x
P02662	Alpha-S1-casein	18	37	P.KHPIKHQGLPQEVLNENLLR.F		20	2362.32	591.59	4	96.94	40.01	591.588	4	77.28	x	x	x	x
P02662	Alpha-S1-casein	18	38	P.KHPIKHQGLPQEVLNENLLRF.F		21	2509.39	628.359	4	88.94	48.67	628.358	4	77.33	x		x	x
P02662	Alpha-S1-casein	19	32	K.HPIKHQGLPQEVLN.E		14	1608.87	537.298	3	39.97	29.33	537.301	3	48.75	x
P02662	Alpha-S1-casein	19	36	K.HPIKHQGLPQEVLNENLL.R		18	2078.13	520.54	4	89.19	46.47	693.726	3	55.56	x	x	x	x
P02662	Alpha-S1-casein	19	37	K.HPIKHQGLPQEVLNENLLR.F		19	2234.23	559.565	4	68.48	42.19	559.569	4	72.83	x	x	x
P02662	Alpha-S1-casein	19	38	K.HPIKHQGLPQEVLNENLLRF.F		20	2381.3	596.332	4	115.07	51.9	596.333	4	76.77	x	x		x
P02662	Alpha-S1-casein	20	38	H.PIKHQGLPQEVLNENLLRF.F		19	2244.24	562.069	4	65.66	54.13	562.07	4	71.85				x
P02662	Alpha-S1-casein	21	36	P.IKHQGLPQEVLNENLL.R		16	1844.02	615.682	3	34.07	49.12	615.686	3	44.95			x
P02662	Alpha-S1-casein	22	32	I.KHQGLPQEVLN.E		11	1261.68	421.567	3	37.01	29.77	631.848	2	70.37		x	x
P02662	Alpha-S1-casein	22	35	I.KHQGLPQEVLNENL.L		14	1617.85	540.291	3	24.37	41.61	540.294	3	42.29		x
P02662	Alpha-S1-casein	22	37	I.KHQGLPQEVLNENLLR.F		16	1887.03	630.02	3	68.31	43.65	630.024	3	84.28		x	x	x
P02662	Alpha-S1-casein	22	38	I.KHQGLPQEVLNENLLRF.F		17	2034.1	679.045	3	94.49	53.09	509.541	4	85.87	x	x	x	x
P02662	Alpha-S1-casein	22	39	I.KHQGLPQEVLNENLLRFF.V		18	2181.17	728.066	3	28.34	62.7	546.306	4	55.95		x
P02662	Alpha-S1-casein	23	32	K.HQGLPQEVLN.E		10	1133.58	567.799	2	23.61	33.56	567.802	2	64.02	x		x	x
P02662	Alpha-S1-casein	23	37	K.HQGLPQEVLNENLLR.F		15	1758.94	587.32	3	80.11	47.33	587.322	3	88.24	x	x	x	x
P02662	Alpha-S1-casein	23	38	K.HQGLPQEVLNENLLRF.F		16	1906.01	636.344	3	99.58	57.7	636.346	3	85.15	x	x	x	x
P02662	Alpha-S1-casein	23	39	K.HQGLPQEVLNENLLRFF.V		17	2053.07	685.368	3	71.62	66.88	685.361	3	82.46		x
P02662	Alpha-S1-casein	24	37	H.QGLPQEVLNENLLR.F		14	1621.88	541.635	3	84.31	52.15	811.949	2	94.65	x	x
P02662	Alpha-S1-casein	24	38	H.QGLPQEVLNENLLRF.F		15	1768.95	590.657	3	97.98	62.7	885.486	2	92.84	x	x
P02662	Alpha-S1-casein	24	39	H.QGLPQEVLNENLLRFF.V		16	1916.02	639.681	3	61.19	72.4	959.014	2	74.77		x
P02662	Alpha-S1-casein	25	32	Q.GLPQEVLN.E		8	868.465	435.241	2	37.13	38.6	435.239	2	42.96	x	x		x
P02662	Alpha-S1-casein	25	37	Q.GLPQEVLNENLLR.F		13	1493.82	498.948	3	81.71	52.45	747.924	2	79.01	x	x	x	x
P02662	Alpha-S1-casein	25	38	Q.GLPQEVLNENLLRF.F		14	1640.89	547.971	3	79.84	63.18	821.463	2	81.12	x	x	x	x
P02662	Alpha-S1-casein	25	39	Q.GLPQEVLNENLLRFF.V		15	1787.96	596.994	3	74.79	73.08	894.988	2	82.16		x		x
P02662	Alpha-S1-casein	26	36	G.LPQEVLNENLL.R		11	1280.7	641.359	2	35.6	54.72	641.359	2	49.4	x	x		x
P02662	Alpha-S1-casein	26	38	G.LPQEVLNENLLRF.F		13	1583.87	528.964	3	99.43	59.55	792.947	2	80.48	x	x		x
P02662	Alpha-S1-casein	28	37	P.QEVLNENLLR.F		10	1226.66	614.339	2	24.48	40.88	614.338	2	48.99	x
P02662	Alpha-S1-casein	29	37	Q.EVLNENLLR.F		9	1098.6	550.311	2	41.33	39.48	550.319	2	58.15	x	x	x	x
P02662	Alpha-S1-casein	29	38	Q.EVLNENLLRF.F		10	1245.67	623.845	2	31.98	54.47	623.856	2	67.66	x	x	x	x
P02662	Alpha-S1-casein	29	39	Q.EVLNENLLRFF.V		11	1392.74	697.38	2	27.14	65.84	697.387	2	72.81	x	x		x
P02662	Alpha-S1-casein	30	37	E.VLNENLLR.F		8	969.561	485.789	2	27.42	35.52	485.788	2	56.77	x	x	x	x
P02662	Alpha-S1-casein	30	38	E.VLNENLLRF.F		9	1116.63	559.324	2	30.92	51.24	559.327	2	66.63	x	x	x	x
P02662	Alpha-S1-casein	30	39	E.VLNENLLRFF.V		10	1263.7	632.859	2	29.95	62.97	632.857	2	65.58	x	x		x
P02662	Alpha-S1-casein	31	38	V.LNENLLRF.F		8	1017.56	509.788	2	42.52	48.83	509.789	2	58.9	x	x	x	x
P02662	Alpha-S1-casein	31	39	V.LNENLLRFF.V		9	1164.63	583.323	2	31.96	61.51	583.322	2	57.64		x
P02662	Alpha-S1-casein	32	38	L.NENLLRF.F		7	904.477	453.246	2	31.49	43.87	453.247	2	44.93	x	x	x	x
P02662	Alpha-S1-casein	32	39	L.NENLLRFF.V		8	1051.55	526.782	2	42.23	57.59	526.792	2	53.65	x	x	x	x
P02662	Alpha-S1-casein	38	49	R.FFVAPFPEVFGK.E		12	1383.72	692.871	2	33.78	63.64	692.87	2	76.59	x	x	x	x
P02662	Alpha-S1-casein	38	51	R.FFVAPFPEVFGKEK.V		14	1640.86	547.962	3	80.51	57.4	547.961	3	74.67	x	x	x	x
P02662	Alpha-S1-casein	38	52	R.FFVAPFPEVFGKEKV.N		15	1739.93	580.985	3	86.7	59.93	580.988	3	82.24	x	x	x	x
P02662	Alpha-S1-casein	38	53	R.FFVAPFPEVFGKEKVN.E		16	1853.97	619	3	51.22	57.27	618.999	3	71.4				x
P02662	Alpha-S1-casein	38	54	R.FFVAPFPEVFGKEKVNE.L		17	1983.01	662.014	3	88.47	58.26	662.013	3	74.38		x		x
P02662	Alpha-S1-casein	38	55	R.FFVAPFPEVFGKEKVNEL.S		18	2096.1	699.711	3	64.51	61.91	699.707	3	74.67		x		x
P02662	Alpha-S1-casein	38	56	R.FFVAPFPEVFGKEKVNELS.K		19	2183.13	728.72	3	53.4	60.67	728.723	3	56.59	x	x		x
P02662	Alpha-S1-casein	38	57	R.FFVAPFPEVFGKEKVNELSK.D		20	2311.23	578.815	4	109.24	56.35	578.821	4	73.07	x	x
P02662	Alpha-S1-casein	39	48	F.FVAPFPEVFG.K		10	1108.56	555.289	2	33.41	64.88	555.291	2	71.91	x	x	x	x
P02662	Alpha-S1-casein	39	49	F.FVAPFPEVFGK.E		11	1236.65	619.338	2	51.26	56.07	619.347	2	78.96	x	x	x	x
P02662	Alpha-S1-casein	39	50	F.FVAPFPEVFGKE.K		12	1365.7	683.858	2	24.45	57.13	683.857	2	72.77	x	x	x	x
P02662	Alpha-S1-casein	39	51	F.FVAPFPEVFGKEK.V		13	1493.79	498.94	3	81.09	50.54	498.95	3	80.8	x	x	x	x
P02662	Alpha-S1-casein	39	52	F.FVAPFPEVFGKEKV.N		14	1592.86	531.963	3	81.7	53.25	797.442	2	94.79	x	x	x	x
P02662	Alpha-S1-casein	39	53	F.FVAPFPEVFGKEKVN.E		15	1706.9	569.978	3	87.7	51.33	569.984	3	72.45	x	x	x	x
P02662	Alpha-S1-casein	39	54	F.FVAPFPEVFGKEKVNE.L		16	1835.95	612.993	3	83	51.48	612.997	3	66.72	x	x	x	x
P02662	Alpha-S1-casein	39	55	F.FVAPFPEVFGKEKVNEL.S		17	1949.03	650.688	3	87.31	56.65	650.689	3	73.31	x	x	x	x
P02662	Alpha-S1-casein	39	56	F.FVAPFPEVFGKEKVNELS.K		18	2036.06	679.699	3	76.72	54.62	679.699	3	76.02	x	x	x	x
P02662	Alpha-S1-casein	39	57	F.FVAPFPEVFGKEKVNELSK.D		19	2164.16	542.049	4	126.61	50.43	542.051	4	84.35	x	x	x	x
P02662	Alpha-S1-casein	39	60	F.FVAPFPEVFGKEKVNELS(+79.97)KDIG.S	Phosphorylation (STY)	22	2529.26	633.324	4	65.23	55.88	844.097	3	37.44				x
P02662	Alpha-S1-casein	39	60	F.FVAPFPEVFGKEKVNELSKDIG.S		22	2449.29	613.333	4	99.34	55.51	817.446	3	46.97			x	x
P02662	Alpha-S1-casein	39	62	F.FVAPFPEVFGKEKVNELSKDIGS(+79.97)E.S	Phosphorylation (STY)	24	2745.33	687.345	4	77.17	56.39	916.129	3	41.92				x
P02662	Alpha-S1-casein	40	48	F.VAPFPEVFG.K		9	961.491	481.754	2	31.01	57.46	481.752	2	58		x
P02662	Alpha-S1-casein	40	49	F.VAPFPEVFGK.E		10	1089.59	545.802	2	42.11	48.67	545.803	2	70.81	x	x	x	x
P02662	Alpha-S1-casein	40	51	F.VAPFPEVFGKEK.V		12	1346.72	449.916	3	70.35	42.75	674.372	2	74.2	x	x	x	x
P02662	Alpha-S1-casein	40	52	F.VAPFPEVFGKEKV.N		13	1445.79	482.94	3	72.27	46.26	723.907	2	87.78	x	x	x	x
P02662	Alpha-S1-casein	40	53	F.VAPFPEVFGKEKVN.E		14	1559.83	520.953	3	69.83	44.46	520.955	3	62.42	x	x	x	x
P02662	Alpha-S1-casein	40	54	F.VAPFPEVFGKEKVNE.L		15	1688.88	563.97	3	80.39	44.18	563.97	3	59.72	x	x	x	x
P02662	Alpha-S1-casein	40	55	F.VAPFPEVFGKEKVNEL.S		16	1801.96	601.664	3	68.21	50.97	601.668	3	63.6	x	x	x	x
P02662	Alpha-S1-casein	40	57	F.VAPFPEVFGKEKVNELSK.D		18	2017.09	505.282	4	114.9	44.66	505.279	4	58.18	x	x		x
P02662	Alpha-S1-casein	41	49	V.APFPEVFGK.E		9	990.517	496.267	2	49.16	45.42	496.275	2	77.9	x	x	x	x
P02662	Alpha-S1-casein	41	50	V.APFPEVFGKE.K		10	1119.56	560.788	2	30.56	46.08	560.788	2	70.93	x	x
P02662	Alpha-S1-casein	41	51	V.APFPEVFGKEK.V		11	1247.65	416.894	3	68.1	39.77	624.843	2	86.17	x	x	x	x
P02662	Alpha-S1-casein	41	52	V.APFPEVFGKEKV.N		12	1346.72	449.915	3	74.71	44.11	449.919	3	82.71	x	x	x	x
P02662	Alpha-S1-casein	41	55	V.APFPEVFGKEKVNEL.S		15	1702.89	568.639	3	77.18	49.12	568.641	3	62.48	x	x
P02662	Alpha-S1-casein	42	49	A.PFPEVFGK.E		8	919.48	460.749	2	40.45	48.57	460.755	2	69.96	x	x	x	x
P02662	Alpha-S1-casein	42	51	A.PFPEVFGKEK.V		10	1176.62	589.318	2	41.13	42.99	589.323	2	72.43	x	x	x	x
P02662	Alpha-S1-casein	42	52	A.PFPEVFGKEKV.N		11	1275.69	426.237	3	71.03	46.76	638.857	2	78.5	x	x	x	x
P02662	Alpha-S1-casein	42	53	A.PFPEVFGKEKVN.E		12	1389.73	464.252	3	70.62	44.01	695.877	2	56.84				x
P02662	Alpha-S1-casein	42	54	A.PFPEVFGKEKVNE.L		13	1518.77	507.267	3	48.34	44.18	507.264	3	55.41				x
P02662	Alpha-S1-casein	42	55	A.PFPEVFGKEKVNEL.S		14	1631.86	544.961	3	60.1	50.92	816.937	2	76.32	x	x		x
P02662	Alpha-S1-casein	43	49	P.FPEVFGK.E		7	822.428	412.223	2	37.22	39.96	412.225	2	61.61	x	x	x	x
P02662	Alpha-S1-casein	43	51	P.FPEVFGKEK.V		9	1079.57	540.79	2	30.49	34.88	360.867	3	62.32	x	x
P02662	Alpha-S1-casein	43	55	P.FPEVFGKEKVNEL.S		13	1534.8	512.608	3	84.55	45.9	512.611	3	54.14	x
P02662	Alpha-S1-casein	44	52	F.PEVFGKEKV.N		9	1031.57	516.79	2	44.36	46.82	516.793	2	63.43	x	x		x
P02662	Alpha-S1-casein	45	52	P.EVFGKEKV.N		8	934.512	468.264	2	42.38	23.93	468.264	2	55.32	x	x	x	x
P02662	Alpha-S1-casein	49	60	G.KEKVNELSKDIG.S		12	1358.74	453.922	3	55.62	23.62	453.921	3	40.73			x
P02662	Alpha-S1-casein	50	73	K.EKVNELSKDIGS(+79.97)ES(+79.97)TEDQAMEDIK.Q	Phosphorylation (STY)	24	2854.19	714.556	4	50.94	43.01	952.41	3	77.39	x			x
P02662	Alpha-S1-casein	50	73	K.EKVNELSKDIGSES(+79.97)TEDQAMEDIK.Q	Phosphorylation (STY)	24	2774.22	694.566	4	36.06	42.06	925.75	3	91.17	x	x	x	x
P02662	Alpha-S1-casein	50	73	K.EKVNELSKDIGSESTEDQAMEDIK.Q		24	2694.25	674.572	4	99.88	40.35	674.575	4	86.81	x	x	x
P02662	Alpha-S1-casein	90	105	N.S(+79.97)VEQKHIQKEDVPSER.Y	Phosphorylation (STY)	16	1987.94	497.993	4	95.81	21.26	497.993	4	66.99	x	x	x	x
P02662	Alpha-S1-casein	90	105	N.SVEQKHIQKEDVPSER.Y		16	1907.97	478	4	81.56	20.12	477.995	4	58.4	x	x	x	x
P02662	Alpha-S1-casein	91	105	S.VEQKHIQKEDVPSER.Y		15	1820.94	456.244	4	83.36	18.73	456.241	4	63.23	x		x	x
P02662	Alpha-S1-casein	95	104	K.HIQKEDVPSE.R		10	1180.57	591.295	2	28.48	19.03	591.297	2	59.42	x	x	x	x
P02662	Alpha-S1-casein	95	106	K.HIQKEDVPSERY.L		12	1499.74	500.921	3	88.82	22.9	500.927	3	74.41	x	x	x	x
P02662	Alpha-S1-casein	95	107	K.HIQKEDVPSERYL.G		13	1612.82	538.614	3	76.14	30.81	538.621	3	62.11	x	x	x	x
P02662	Alpha-S1-casein	95	108	K.HIQKEDVPSERYLG.Y		14	1669.84	557.622	3	99.05	29.29	557.63	3	70.38	x	x	x	x
P02662	Alpha-S1-casein	95	109	K.HIQKEDVPSERYLGY.L		15	1832.91	459.236	4	91.15	34.1	611.981	3	83.22	x	x	x	x
P02662	Alpha-S1-casein	95	110	K.HIQKEDVPSERYLGYL.E		16	1945.99	649.673	3	71.97	43.35	649.673	3	66.01	x	x	x	x
P02662	Alpha-S1-casein	95	111	K.HIQKEDVPSERYLGYLE.Q		17	2075.03	519.766	4	110.79	42.27	692.694	3	63.22	x	x	x	x
P02662	Alpha-S1-casein	95	112	K.HIQKEDVPSERYLGYLEQ.L		18	2203.09	551.783	4	118.76	41.73	735.376	3	65.89	x	x	x	x
P02662	Alpha-S1-casein	95	113	K.HIQKEDVPSERYLGYLEQL.L		19	2316.18	580.053	4	106.93	53.05	773.071	3	73.62	x	x	x	x
P02662	Alpha-S1-casein	95	114	K.HIQKEDVPSERYLGYLEQLL.R		20	2429.26	608.323	4	78.48	64.09	810.765	3	68.31	x	x	x	x
P02662	Alpha-S1-casein	95	115	K.HIQKEDVPSERYLGYLEQLLR.L		21	2585.36	647.348	4	105.22	61	647.356	4	92.73	x	x	x	x
P02662	Alpha-S1-casein	95	116	K.HIQKEDVPSERYLGYLEQLLRL.K		22	2698.44	675.621	4	119.41	68.78	675.625	4	76.92	x	x	x	x
P02662	Alpha-S1-casein	95	117	K.HIQKEDVPSERYLGYLEQLLRLK.K		23	2826.54	566.316	5	103.76	63.49	707.651	4	81.26	x	x	x	x
P02662	Alpha-S1-casein	95	118	K.HIQKEDVPSERYLGYLEQLLRLKK.Y		24	2954.63	591.935	5	93.53	58.68	591.938	5	75.21	x	x		x
P02662	Alpha-S1-casein	95	119	K.HIQKEDVPSERYLGYLEQLLRLKKY.K		25	3117.7	624.548	5	85.44	59.48	624.559	5	69.29	x	x		x
P02662	Alpha-S1-casein	96	104	H.IQKEDVPSE.R		9	1043.51	522.764	2	24.86	21.4	522.772	2	55.71	x	x	x	x
P02662	Alpha-S1-casein	96	105	H.IQKEDVPSER.Y		10	1199.61	400.88	3	59.79	18.82	400.882	3	55.32	x	x	x	x
P02662	Alpha-S1-casein	96	106	H.IQKEDVPSERY.L		11	1362.68	455.235	3	61.16	24.99	455.235	3	54.93	x	x	x	x
P02662	Alpha-S1-casein	96	107	H.IQKEDVPSERYL.G		12	1475.76	492.928	3	69.86	33.56	492.928	3	38.68	x	x	x	x
P02662	Alpha-S1-casein	97	106	I.QKEDVPSERY.L		10	1249.59	417.539	3	60.42	21.74	625.8	2	46.58	x	x
P02662	Alpha-S1-casein	97	108	I.QKEDVPSERYLG.Y		12	1419.7	474.24	3	69.72	28.97	474.242	3	30.67	x
P02662	Alpha-S1-casein	99	107	K.EDVPSERYL.G		9	1106.52	554.27	2	35.69	35.16	554.273	2	38.72	x	x
P02662	Alpha-S1-casein	100	107	E.DVPSERYL.G		8	977.482	489.748	2	23.39	34.64	489.747	2	44.54	x
P02662	Alpha-S1-casein	106	115	R.YLGYLEQLLR.L		10	1266.7	634.358	2	31.57	61.07	634.363	2	64.98		x
P02662	Alpha-S1-casein	107	115	Y.LGYLEQLLR.L		9	1103.63	552.825	2	23.24	55	552.825	2	62.63	x	x
P02662	Alpha-S1-casein	107	116	Y.LGYLEQLLRL.K		10	1216.72	609.369	2	38.58	67.89	609.371	2	65.19		x
P02662	Alpha-S1-casein	107	117	Y.LGYLEQLLRLK.K		11	1344.81	449.279	3	42.54	58.51	449.279	3	65.03		x
P02662	Alpha-S1-casein	108	117	L.GYLEQLLRLK.K		10	1231.73	411.584	3	60.17	54.98	411.585	3	51.87	x	x	x	x
P02662	Alpha-S1-casein	109	116	G.YLEQLLRL.K		8	1046.61	524.314	2	34.66	57.16	524.318	2	52.14	x	x	x
P02662	Alpha-S1-casein	110	116	Y.LEQLLRL.K		7	883.549	442.782	2	27.6	48.08	442.784	2	38.71	x	x	x	x
P02662	Alpha-S1-casein	110	117	Y.LEQLLRLK.K		8	1011.64	506.83	2	27.31	37.76	506.83	2	44.17	x	x	x
P02662	Alpha-S1-casein	116	138	R.LKKYKVPQLEIVPNS(+79.97)AEERLHSM(+15.99).K	Phosphorylation (STY); Oxidation (M)	23	2804.43	702.116	4	65.53	41.9	702.121	4	43.59	x	x		x
P02662	Alpha-S1-casein	116	138	R.LKKYKVPQLEIVPNS(+79.97)AEERLHSM.K	Phosphorylation (STY)	23	2788.43	698.12	4	80.44	45.84	698.119	4	61.8	x	x	x	x
P02662	Alpha-S1-casein	118	129	K.KYKVPQLEIVPN.S		12	1426.82	476.615	3	62.99	42.38	476.615	3	65.18	x	x	x	x
P02662	Alpha-S1-casein	118	134	K.KYKVPQLEIVPNS(+79.97)AEER.L	Phosphorylation (STY)	17	2079.04	694.023	3	62.31	41.54	694.022	3	65.7	x	x	x
P02662	Alpha-S1-casein	118	136	K.KYKVPQLEIVPNS(+79.97)AEERLH.S	Phosphorylation (STY)	19	2329.18	583.305	4	104.8	43.35	583.308	4	78.34	x	x	x
P02662	Alpha-S1-casein	118	138	K.KYKVPQLEIVPNS(+79.97)AEERLHSM(+15.99).K	Phosphorylation (STY); Oxidation (M)	21	2563.25	641.823	4	101.16	42.82	641.826	4	47.73	x	x	x	x
P02662	Alpha-S1-casein	118	138	K.KYKVPQLEIVPNS(+79.97)AEERLHSM.K	Phosphorylation (STY)	21	2547.26	637.823	4	102.06	48.08	637.826	4	72.99	x	x	x	x
P02662	Alpha-S1-casein	118	138	K.KYKVPQLEIVPNSAEERLHSM(+15.99).K	Oxidation (M)	21	2483.28	621.828	4	89.39	41.71	621.835	4	41.75	x	x
P02662	Alpha-S1-casein	118	138	K.KYKVPQLEIVPNSAEERLHSM.K		21	2467.29	617.831	4	100.77	46.14	617.833	4	77.37	x	x	x	x
P02662	Alpha-S1-casein	118	139	K.KYKVPQLEIVPNS(+79.97)AEERLHSM(+15.99)K.E	Phosphorylation (STY); Oxidation (M)	22	2691.35	673.845	4	102.07	40.69	673.845	4	53.77	x	x		x
P02662	Alpha-S1-casein	118	139	K.KYKVPQLEIVPNS(+79.97)AEERLHSMK.E	Phosphorylation (STY)	22	2675.35	669.848	4	104.65	43.71	536.078	5	63.79	x	x	x	x
P02662	Alpha-S1-casein	119	134	K.YKVPQLEIVPNS(+79.97)AEER.L	Phosphorylation (STY)	16	1950.95	651.325	3	94.46	45.65	651.321	3	50.71	x	x	x	x
P02662	Alpha-S1-casein	119	134	K.YKVPQLEIVPNSAEER.L		16	1870.98	624.669	3	108.1	43.79	624.67	3	76.8	x	x
P02662	Alpha-S1-casein	119	136	K.YKVPQLEIVPNS(+79.97)AEERLH.S	Phosphorylation (STY)	18	2201.09	734.704	3	78.03	46.88	734.709	3	61.37	x	x	x	x
P02662	Alpha-S1-casein	119	138	K.YKVPQLEIVPNS(+79.97)AEERLHSM(+15.99).K	Phosphorylation (STY); Oxidation (M)	20	2435.16	609.798	4	114.17	46.59	812.732	3	53.34	x	x	x	x
P02662	Alpha-S1-casein	119	138	K.YKVPQLEIVPNS(+79.97)AEERLHSM.K	Phosphorylation (STY)	20	2419.16	605.801	4	104.8	51.02	807.402	3	61.83	x	x	x	x
P02662	Alpha-S1-casein	119	138	K.YKVPQLEIVPNSAEERLHSM(+15.99).K	Oxidation (M)	20	2355.19	589.806	4	94.99	44.85	589.807	4	48.23	x	x
P02662	Alpha-S1-casein	119	139	K.YKVPQLEIVPNS(+79.97)AEERLHSM(+15.99)K.E	Phosphorylation (STY); Oxidation (M)	21	2563.25	641.821	4	25.66	1.38	641.825	4	37.71	x			x
P02662	Alpha-S1-casein	119	139	K.YKVPQLEIVPNS(+79.97)AEERLHSMK.E	Phosphorylation (STY)	21	2547.26	637.824	4	100.67	46.48	637.823	4	54.56	x	x	x	x
P02662	Alpha-S1-casein	120	134	Y.KVPQLEIVPNS(+79.97)AEER.L	Phosphorylation (STY)	15	1787.88	596.971	3	93.8	40.06	596.973	3	59.51	x	x	x	x
P02662	Alpha-S1-casein	120	134	Y.KVPQLEIVPNSAEER.L		15	1707.92	570.313	3	85.92	38.54	570.311	3	74.1	x	x		x
P02662	Alpha-S1-casein	120	136	Y.KVPQLEIVPNS(+79.97)AEERLH.S	Phosphorylation (STY)	17	2038.02	680.351	3	74.81	42.86	680.351	3	74.41	x	x	x	x
P02662	Alpha-S1-casein	120	138	Y.KVPQLEIVPNS(+79.97)AEERLHSM(+15.99).K	Phosphorylation (STY); Oxidation (M)	19	2272.09	569.032	4	86.01	42.75	758.378	3	70.24	x	x	x	x
P02662	Alpha-S1-casein	120	138	Y.KVPQLEIVPNS(+79.97)AEERLHSM.K	Phosphorylation (STY)	19	2256.1	565.033	4	75.61	48.37	753.045	3	76.87	x	x	x	x
P02662	Alpha-S1-casein	120	139	Y.KVPQLEIVPNS(+79.97)AEERLHSM(+15.99)K.E	Phosphorylation (STY); Oxidation (M)	20	2400.19	601.055	4	95.35	39.6	601.058	4	59.46	x	x		x
P02662	Alpha-S1-casein	120	139	Y.KVPQLEIVPNS(+79.97)AEERLHSMK.E	Phosphorylation (STY)	20	2384.19	597.059	4	93.78	43.32	597.059	4	73.11	x	x		x
P02662	Alpha-S1-casein	121	129	K.VPQLEIVPN.S		9	1007.57	504.791	2	39.48	45.94	504.793	2	54.48	x	x		x
P02662	Alpha-S1-casein	121	134	K.VPQLEIVPNSAEER.L		14	1579.82	527.615	3	87.39	41.75	790.922	2	82.1	x	x		x
P02662	Alpha-S1-casein	121	136	K.VPQLEIVPNS(+79.97)AEERLH.S	Phosphorylation (STY)	16	1909.93	637.654	3	96.51	45.56	637.654	3	65.07	x	x		x
P02662	Alpha-S1-casein	121	136	K.VPQLEIVPNSAEERLH.S		16	1829.96	610.996	3	91.83	43.49	610.996	3	66.37	x
P02662	Alpha-S1-casein	121	137	K.VPQLEIVPNS(+79.97)AEERLHS.M	Phosphorylation (STY)	17	1996.96	666.662	3	85.77	46.03	666.662	3	51.99	x	x		x
P02662	Alpha-S1-casein	121	138	K.VPQLEIVPNS(+79.97)AEERLHSM(+15.99).K	Phosphorylation (STY); Oxidation (M)	18	2144	715.676	3	106.16	45.6	715.681	3	58.22	x	x		x
P02662	Alpha-S1-casein	121	138	K.VPQLEIVPNS(+79.97)AEERLHSM.K	Phosphorylation (STY)	18	2128	710.344	3	96.61	51.55	710.353	3	84.43	x	x	x	x
P02662	Alpha-S1-casein	121	138	K.VPQLEIVPNSAEERLHSM(+15.99).K	Oxidation (M)	18	2064.03	689.019	3	103.95	43.47	689.02	3	69.61	x	x
P02662	Alpha-S1-casein	121	138	K.VPQLEIVPNSAEERLHSM.K		18	2048.04	683.688	3	99.43	48.88	683.696	3	84.78	x	x		x
P02662	Alpha-S1-casein	121	139	K.VPQLEIVPNS(+79.97)AEERLHSM(+15.99)K.E	Phosphorylation (STY); Oxidation (M)	19	2272.09	569.031	4	107.86	41.87	758.377	3	62.4	x	x		x
P02662	Alpha-S1-casein	121	139	K.VPQLEIVPNS(+79.97)AEERLHSMK.E	Phosphorylation (STY)	19	2256.1	565.032	4	112.11	46.22	753.045	3	79.16	x	x	x	x
P02662	Alpha-S1-casein	121	145	K.VPQLEIVPNS(+79.97)AEERLHSMKEGIHAQ.Q	Phosphorylation (STY)	25	2891.4	723.858	4	64.2	47.29	723.861	4	41.74	x
P02662	Alpha-S1-casein	121	147	K.VPQLEIVPNS(+79.97)AEERLHSMKEGIHAQQK.E	Phosphorylation (STY)	27	3147.55	630.519	5	90.62	44.61	630.529	5	47.16	x	x		x
P02662	Alpha-S1-casein	123	136	P.QLEIVPNS(+79.97)AEERLH.S	Phosphorylation (STY)	14	1713.81	572.278	3	89.39	41.16	572.28	3	37.94	x
P02662	Alpha-S1-casein	123	138	P.QLEIVPNS(+79.97)AEERLHSM(+15.99).K	Phosphorylation (STY); Oxidation (M)	16	1947.88	650.3	3	65.48	41.19	650.305	3	46.18	x	x
P02662	Alpha-S1-casein	123	138	P.QLEIVPNS(+79.97)AEERLHSM.K	Phosphorylation (STY)	16	1931.88	644.97	3	79.56	47.85	644.972	3	61.89	x	x	x
P02662	Alpha-S1-casein	123	138	P.QLEIVPNSAEERLHSM.K		16	1851.91	618.313	3	87.38	44.52	618.315	3	55.87	x	x
P02662	Alpha-S1-casein	123	139	P.QLEIVPNS(+79.97)AEERLHSM(+15.99)K.E	Phosphorylation (STY); Oxidation (M)	17	2075.97	692.999	3	58.13	37.46	692.999	3	28.37	x	x
P02662	Alpha-S1-casein	123	139	P.QLEIVPNS(+79.97)AEERLHSMK.E	Phosphorylation (STY)	17	2059.98	516.003	4	112.53	42.4	687.67	3	52	x	x	x
P02662	Alpha-S1-casein	124	137	Q.LEIVPNS(+79.97)AEERLHS.M	Phosphorylation (STY)	14	1672.78	558.603	3	76.89	40.38	558.601	3	36.26	x	x
P02662	Alpha-S1-casein	124	138	Q.LEIVPNS(+79.97)AEERLHSM(+15.99).K	Phosphorylation (STY); Oxidation (M)	15	1819.82	607.614	3	77.18	40.18	607.614	3	56.11	x	x	x	x
P02662	Alpha-S1-casein	124	138	Q.LEIVPNS(+79.97)AEERLHSM.K	Phosphorylation (STY)	15	1803.82	602.284	3	84	46.53	602.29	3	65.96	x	x	x	x
P02662	Alpha-S1-casein	124	139	Q.LEIVPNS(+79.97)AEERLHSMK.E	Phosphorylation (STY)	16	1931.92	644.98	3	62.12	41.53	644.988	3	46.77	x	x	x
P02662	Alpha-S1-casein	125	136	L.EIVPNS(+79.97)AEERLH.S	Phosphorylation (STY)	12	1472.67	491.896	3	66.05	32.6	737.34	2	45.59	x	x
P02662	Alpha-S1-casein	125	138	L.EIVPNS(+79.97)AEERLHSM(+15.99).K	Phosphorylation (STY); Oxidation (M)	14	1706.73	569.921	3	80.56	33.06	569.924	3	50.83	x	x		x
P02662	Alpha-S1-casein	125	138	L.EIVPNS(+79.97)AEERLHSM.K	Phosphorylation (STY)	14	1690.74	564.588	3	78.17	40.75	564.593	3	63.66	x	x	x	x
P02662	Alpha-S1-casein	125	138	L.EIVPNSAEERLHSM.K		14	1610.77	537.932	3	81.12	37.37	537.932	3	53.92	x	x		x
P02662	Alpha-S1-casein	125	139	L.EIVPNS(+79.97)AEERLHSMK.E	Phosphorylation (STY)	15	1818.83	607.288	3	64.51	35.21	607.29	3	41.78	x	x	x	x
P02662	Alpha-S1-casein	127	138	I.VPNS(+79.97)AEERLHSM.K	Phosphorylation (STY)	12	1448.61	483.877	3	94.28	31.45	725.316	2	58.57	x	x
P02662	Alpha-S1-casein	130	138	N.S(+79.97)AEERLHSM.K	Phosphorylation (STY)	9	1138.45	570.232	2	39.76	24.1	570.236	2	70.06	x	x	x	x
P02662	Alpha-S1-casein	130	138	N.SAEERLHSM.K		9	1058.48	530.248	2	38.96	21.78	530.252	2	58.43	x	x	x	x
P02662	Alpha-S1-casein	130	139	N.S(+79.97)AEERLHSMK.E	Phosphorylation (STY)	10	1266.54	423.189	3	69.54	19.69	423.182	3	51.98	x	x	x	x
P02662	Alpha-S1-casein	139	153	M.KEGIHAQQKEPM(+15.99)IGV.N	Oxidation (M)	15	1679.87	560.964	3	55.99	27.5	560.967	3	48.74		x
P02662	Alpha-S1-casein	140	159	K.EGIHAQQKEPMIGVNQELAY.F		20	2254.11	752.377	3	39.09	42.74	752.383	3	78.27	x	x	x	x
P02662	Alpha-S1-casein	193	212	P.SFSDIPNPIGSENSEKTTMP.L		20	2149.98	717.671	3	40.7	48.25	1076	2	90.41			x
P02662	Alpha-S1-casein	195	214	F.SDIPNPIGSENSEKTTM(+15.99)PLW	Oxidation (M)	20	2231.04	744.69	3	61.76	51.33	1116.53	2	101.54	x	x	x	x
P02662	Alpha-S1-casein	195	214	F.SDIPNPIGSENSEKTTMPLW		20	2215.05	739.361	3	62.54	55.67	1108.54	2	103.91	x	x	x	x
P02662	Alpha-S1-casein	196	214	S.DIPNPIGSENSEKTTM(+15.99)PLW	Oxidation (M)	19	2144.01	715.68	3	61.12	52.94	1073.02	2	93.9	x	x
P02662	Alpha-S1-casein	197	214	D.IPNPIGSENSEKTTMPLW		18	2012.99	672.008	3	81.59	54.24	1007.51	2	102	x	x	x	x
P02662	Alpha-S1-casein	200	212	N.PIGSENSEKTTM(+15.99)P.L	Oxidation (M)	13	1405.64	469.555	3	72.16	20.75	703.831	2	82.17	x	x	x	x
P02662	Alpha-S1-casein	200	212	N.PIGSENSEKTTMP.L		13	1389.64	464.223	3	81.15	27.53	695.842	2	85.29	x	x	x	x
P02662	Alpha-S1-casein	200	214	N.PIGSENSEKTTM(+15.99)PLW	Oxidation (M)	15	1704.8	569.276	3	71.83	41.4	853.413	2	99.72	x	x	x	x
P02662	Alpha-S1-casein	200	214	N.PIGSENSEKTTMPLW		15	1688.81	563.945	3	86.73	47.98	845.416	2	101.47	x	x	x	x
P02662	Alpha-S1-casein	201	212	P.IGSENSEKTTMP.L		12	1292.59	647.305	2	42.89	25.27	647.312	2	75.81	x	x	x	x
P02662	Alpha-S1-casein	201	214	P.IGSENSEKTTM(+15.99)PLW	Oxidation (M)	14	1607.75	804.885	2	36.24	39.4	804.889	2	83.66	x		x	x
P02662	Alpha-S1-casein	201	214	P.IGSENSEKTTMPLW		14	1591.76	796.888	2	49.5	46.56	796.893	2	85.96	x		x	x
P02662	Alpha-S1-casein	202	214	I.GSENSEKTTM(+15.99)PLW	Oxidation (M)	13	1494.67	748.341	2	34.86	36.66	748.34	2	60.39	x		x
P02662	Alpha-S1-casein	202	214	I.GSENSEKTTMPLW		13	1478.67	740.344	2	25.17	44.67	740.348	2	73.5	x		x
P02662	Alpha-S1-casein	203	214	G.SENSEKTTM(+15.99)PLW	Oxidation (M)	12	1437.64	719.832	2	29.66	36.46	719.835	2	69.37	x	x	x	x
P02662	Alpha-S1-casein	203	214	G.SENSEKTTMPLW		12	1421.65	711.835	2	22.75	44.34	711.833	2	72.83	x		x	x
P02662	Alpha-S1-casein	204	214	S.ENSEKTTMPLW		11	1334.62	668.318	2	23.29	44.76	668.319	2	59.37			x	x
P02662	Alpha-S1-casein	206	214	N.SEKTTM(+15.99)PLW	Oxidation (M)	9	1107.53	554.772	2	24.16	35.43	554.777	2	56.09	x	x	x	x
P02662	Alpha-S1-casein	206	214	N.SEKTTMPLW		9	1091.53	546.775	2	33.22	43.78	546.777	2	61.81	x	x	x	x
P02663	Alpha-S2-casein	16	36	A.KNTM(+15.99)EHVSSSEESIISQETYK.Q	Oxidation (M)	21	2442.12	611.539	4	84.88	32.12	611.538	4	64.24	x	x	x
P02663	Alpha-S2-casein	16	36	A.KNTMEHVSS(+79.97)S(+79.97)EESIISQETYK.Q	Phosphorylation (STY)	21	2586.06	863.029	3	34.55	39.99	863.033	3	57.53	x		x
P02663	Alpha-S2-casein	16	36	A.KNTMEHVSSSEESIIS(+79.97)QETYK.Q	Phosphorylation (STY)	21	2506.09	836.375	3	32.45	36.41	836.373	3	83.72	x	x	x	x
P02663	Alpha-S2-casein	16	36	A.KNTMEHVSSSEESIISQETYK.Q		21	2426.13	607.54	4	106.24	35.83	607.544	4	75.14	x	x	x	x
P02663	Alpha-S2-casein	16	38	A.KNTMEHVSSSEESIISQETYKQE.K		23	2683.23	671.816	4	105.43	36.13	671.818	4	68.24	x
P02663	Alpha-S2-casein	16	39	A.KNTM(+15.99)EHVSSS(+79.97)EESIIS(+79.97)QETYKQEK.N	Oxidation (M) ; Phosphorylation (STY)	24	2987.25	747.822	4	81	33.33	747.826	4	56.43	x	x		x
P02663	Alpha-S2-casein	16	39	A.KNTM(+15.99)EHVSSSEESIIS(+79.97)QETYKQEK.N	Oxidation (M) ; Phosphorylation (STY)	24	2907.28	727.833	4	97.24	31.4	727.836	4	75.68	x	x	x	x
P02663	Alpha-S2-casein	16	39	A.KNTM(+15.99)EHVSSSEESIISQETYKQEK.N	Oxidation (M)	24	2827.32	707.838	4	118.93	30.48	707.84	4	91.19	x	x	x	x
P02663	Alpha-S2-casein	16	39	A.KNTMEHVS(+79.97)S(+79.97)SEES(+79.97)IISQETYKQEK.N	Phosphorylation (STY)	24	3051.22	763.818	4	29.89	38.45	763.816	4	50.66		x		x
P02663	Alpha-S2-casein	16	39	A.KNTMEHVS(+79.97)SS(+79.97)EESIIS(+79.97)QETYKQEK.N	Phosphorylation (STY)	24	3051.22	763.814	4	61.74	37.53	1018.08	3	61.93	x		x	x
P02663	Alpha-S2-casein	16	39	A.KNTMEHVS(+79.97)SS(+79.97)EESIISQETYKQEK.N	Phosphorylation (STY)	24	2971.26	743.824	4	74.35	37.55	991.424	3	57.67	x	x	x	x
P02663	Alpha-S2-casein	16	39	A.KNTMEHVS(+79.97)SSEESIIS(+79.97)QETYKQEK.N	Phosphorylation (STY)	24	2971.26	743.824	4	83.35	36.27	743.825	4	54.76	x	x	x	x
P02663	Alpha-S2-casein	16	39	A.KNTMEHVSS(+79.97)S(+79.97)EESIISQETYKQEK.N	Phosphorylation (STY)	24	2971.26	743.822	4	72.31	37.85	743.824	4	65.35	x	x	x	x
P02663	Alpha-S2-casein	16	39	A.KNTMEHVSSS(+79.97)EESIIS(+79.97)QETYKQEK.N	Phosphorylation (STY)	24	2971.26	743.825	4	78.77	35.97	991.429	3	73.33	x	x	x	x
P02663	Alpha-S2-casein	16	39	A.KNTMEHVSSSEESIIS(+79.97)QETYKQEK.N	Phosphorylation (STY)	24	2891.29	723.831	4	112.11	35.02	723.838	4	78.66	x	x	x	x
P02663	Alpha-S2-casein	16	39	A.KNTMEHVSSSEESIISQETYKQEK.N		24	2811.32	703.839	4	126.45	34.09	703.844	4	87.63	x	x	x	x
P02663	Alpha-S2-casein	27	39	E.ESIIS(+79.97)QETYKQEK.N	Phosphorylation (STY)	13	1661.75	554.928	3	74.29	32.46	831.892	2	56.31	x	x		x
P02663	Alpha-S2-casein	28	39	E.SIIS(+79.97)QETYKQEK.N	Phosphorylation (STY)	12	1532.71	511.911	3	77.19	31.15	767.365	2	48.4	x	x	x	x
P02663	Alpha-S2-casein	28	39	E.SIISQETYKQEK.N		12	1452.75	485.258	3	84.37	26.33	485.257	3	39.77				x
P02663	Alpha-S2-casein	29	36	S.IIS(+79.97)QETYK.Q	Phosphorylation (STY)	8	1060.48	531.249	2	28.33	28.1	531.25	2	45.67	x	x		x
P02663	Alpha-S2-casein	29	39	S.IIS(+79.97)QETYKQEK.N	Phosphorylation (STY)	11	1445.68	482.902	3	69.11	24.73	723.847	2	72.57	x	x	x	x
P02663	Alpha-S2-casein	29	39	S.IISQETYKQEK.N		11	1365.71	456.247	3	70.04	20.42	456.246	3	31.69				x
P02663	Alpha-S2-casein	86	94	K.ITVDDKHYQ.K		9	1117.54	559.778	2	36.3	22.23	559.777	2	45.35		x		x
P02663	Alpha-S2-casein	96	103	K.ALNEINQF.Y		8	947.471	474.744	2	35.41	42.34	474.747	2	53.52	x	x		x
P02663	Alpha-S2-casein	104	110	F.YQKFPQY.L		7	972.471	487.245	2	42.77	32.02	487.245	2	64.33	x	x	x	x
P02663	Alpha-S2-casein	104	113	F.YQKFPQYLQY.L		10	1376.68	689.348	2	37.67	45.46	689.347	2	78.14	x	x
P02663	Alpha-S2-casein	105	113	Y.QKFPQYLQY.L		9	1213.61	607.816	2	31.4	43.09	607.818	2	66.98	x	x
P02663	Alpha-S2-casein	114	128	Y.LYQGPIVLNPWDQVK.R		15	1768.95	590.661	3	78.71	55.86	885.49	2	88.77	x	x		x
P02663	Alpha-S2-casein	114	129	Y.LYQGPIVLNPWDQVKR.N		16	1925.05	642.696	3	90.24	51.24	642.703	3	82.28	x	x	x	x
P02663	Alpha-S2-casein	114	130	Y.LYQGPIVLNPWDQVKRN.A		17	2039.1	680.708	3	71.35	51.57	680.708	3	64.68	x
P02663	Alpha-S2-casein	115	128	L.YQGPIVLNPWDQVK.R		14	1655.87	552.965	3	55.64	53.57	828.946	2	82.24	x	x		x
P02663	Alpha-S2-casein	115	129	L.YQGPIVLNPWDQVKR.N		15	1811.97	604.998	3	95.75	48.95	605.005	3	79.79	x	x	x	x
P02663	Alpha-S2-casein	115	130	L.YQGPIVLNPWDQVKRN.A		16	1926.01	643.012	3	74.77	48.68	643.011	3	70.52	x	x
P02663	Alpha-S2-casein	116	128	Y.QGPIVLNPWDQVK.R		13	1492.8	747.412	2	23.56	50.69	747.413	2	83	x	x
P02663	Alpha-S2-casein	116	129	Y.QGPIVLNPWDQVKR.N		14	1648.9	550.644	3	81.44	46.08	550.649	3	82.9	x	x
P02663	Alpha-S2-casein	116	130	Y.QGPIVLNPWDQVKRN.A		15	1762.95	588.657	3	79.03	45.82	588.658	3	66.51	x
P02663	Alpha-S2-casein	117	128	Q.GPIVLNPWDQVK.R		12	1364.75	683.382	2	38.9	50.44	683.385	2	76.82	x	x
P02663	Alpha-S2-casein	117	129	Q.GPIVLNPWDQVKR.N		13	1520.85	507.956	3	69.74	45.81	507.964	3	71.78	x	x
P02663	Alpha-S2-casein	117	130	Q.GPIVLNPWDQVKRN.A		14	1634.89	545.971	3	60.03	45.5	545.976	3	60.16	x
P02663	Alpha-S2-casein	119	128	P.IVLNPWDQVK.R		10	1210.67	606.345	2	36.98	47.01	606.348	2	59.93			x	x
P02663	Alpha-S2-casein	123	137	N.PWDQVKRNAVPITPT.L		15	1720.93	574.65	3	50.04	36.79	861.474	2	53.57	x		x
P02663	Alpha-S2-casein	130	151	R.NAVPITPTLNREQLS(+79.97)TS(+79.97)EENSK.K	Phosphorylation (STY)	22	2587.16	863.396	3	27.19	40.41	863.401	3	51.58	x	x
P02663	Alpha-S2-casein	130	151	R.NAVPITPTLNREQLSTSEENSK.K		22	2427.22	810.085	3	36.95	37.56	810.088	3	69.24	x	x
P02663	Alpha-S2-casein	130	152	R.NAVPITPTLNREQLS(+79.97)TS(+79.97)EENSKK.T	Phosphorylation (STY)	23	2715.25	679.822	4	89.38	37.42	906.097	3	56.48	x	x
P02663	Alpha-S2-casein	130	152	R.NAVPITPTLNREQLSTS(+79.97)EENSKK.T	Phosphorylation (STY)	23	2635.29	659.83	4	105.45	36.34	879.44	3	59.29	x	x	x	x
P02663	Alpha-S2-casein	130	153	R.NAVPITPTLNREQLS(+79.97)TS(+79.97)EENSKKT.V	Phosphorylation (STY)	24	2816.3	705.083	4	52.5	37.53	939.775	3	51.55	x
P02663	Alpha-S2-casein	130	155	R.NAVPITPTLNREQLS(+79.97)TS(+79.97)EENSKKTVD.M	Phosphorylation (STY)	26	3030.39	758.607	4	60.19	38.95	1011.14	3	38.86	x
P02663	Alpha-S2-casein	130	164	R.NAVPITPTLNREQLS(+79.97)TS(+79.97)EENSKKTVDMESTEVFTK.K	Phosphorylation (STY)	35	4082.88	817.585	5	79.1	47.03	1021.74	4	56.59	x	x		x
P02663	Alpha-S2-casein	130	164	R.NAVPITPTLNREQLST(+79.97)SEENSKKTVDMES(+79.97)TEVFTK.K	Phosphorylation (STY)	35	4082.88	817.586	5	70.2	45.81	1021.74	4	47.41	x	x	x	x
P02663	Alpha-S2-casein	130	164	R.NAVPITPTLNREQLSTSEENS(+79.97)KKTVDMESTEVFTK.K	Phosphorylation (STY)	35	4002.91	1001.74	4	31.14	45.58	1001.74	4	55.2	x	x
P02663	Alpha-S2-casein	130	165	R.NAVPITPTLNREQLS(+79.97)TS(+79.97)EENSKKTVDMESTEVFTKK.T	Phosphorylation (STY)	36	4210.97	843.206	5	48.47	44.94	843.203	5	42.88	x	x	x
P02663	Alpha-S2-casein	130	165	R.NAVPITPTLNREQLS(+79.97)TSEENSKKTVDMES(+79.97)TEVFTKK.T	Phosphorylation (STY)	36	4210.97	843.205	5	41.45	43.63	843.208	5	46.85	x	x
P02663	Alpha-S2-casein	130	165	R.NAVPITPTLNREQLSTS(+79.97)EENSKKTVDM(+15.99)ES(+79.97)TEVFTKK.T	Phosphorylation (STY); Oxidation (M)	36	4226.97	846.405	5	35.14	40.62	846.408	5	32.5		x
P02663	Alpha-S2-casein	130	165	R.NAVPITPTLNREQLSTS(+79.97)EENSKKTVDMES(+79.97)TEVFTKK.T	Phosphorylation (STY)	36	4210.97	843.205	5	48.91	43.62	1053.75	4	39.03	x	x
P02663	Alpha-S2-casein	130	165	R.NAVPITPTLNREQLSTSEENS(+79.97)KKTVDMESTEVFTKK.T	Phosphorylation (STY)	36	4131.01	689.511	6	44.59	43.82	827.218	5	49.58	x	x	x	x
P02663	Alpha-S2-casein	138	151	T.LNREQLS(+79.97)TS(+79.97)EENSK.K	Phosphorylation (STY)	14	1793.72	598.915	3	72.35	23.01	598.914	3	34.72	x	x	x	x
P02663	Alpha-S2-casein	138	151	T.LNREQLSTS(+79.97)EENSK.K	Phosphorylation (STY)	14	1713.76	572.26	3	90.47	22.48	572.262	3	55.4	x	x		x
P02663	Alpha-S2-casein	138	152	T.LNREQLS(+79.97)TS(+79.97)EENSKK.T	Phosphorylation (STY)	15	1921.82	641.614	3	78	20.95	641.618	3	54.9	x	x	x	x
P02663	Alpha-S2-casein	138	152	T.LNREQLSTS(+79.97)EENSKK.T	Phosphorylation (STY)	15	1841.85	614.96	3	79.03	20.35	614.967	3	52.27	x	x	x	x
P02663	Alpha-S2-casein	138	153	T.LNREQLS(+79.97)TS(+79.97)EENSKKT.V	Phosphorylation (STY)	16	2022.87	675.297	3	45.96	21.62	675.3	3	43.64	x	x
P02663	Alpha-S2-casein	138	154	T.LNREQLST(+79.97)S(+79.97)EENSKKTV.D	Phosphorylation (STY)	17	2121.93	708.32	3	48.46	25.65	708.318	3	39.79		x		x
P02663	Alpha-S2-casein	138	154	T.LNREQLSTS(+79.97)EENSKKTV.D	Phosphorylation (STY)	17	2041.97	681.663	3	53.48	24.75	681.664	3	51.8	x	x
P02663	Alpha-S2-casein	138	164	T.LNREQLSTS(+79.97)EENSKKTVDMESTEVFTK.K	Phosphorylation (STY)	27	3209.48	803.38	4	117	37.89	803.383	4	68.09	x	x
P02663	Alpha-S2-casein	138	165	T.LNREQLSTS(+79.97)EENSKKTVDMES(+79.97)TEVFTKK.T	Phosphorylation (STY)	28	3417.54	684.517	5	41.55	35.61	855.402	4	33.03	x	x		x
P02663	Alpha-S2-casein	150	164	N.SKKTVDM(+15.99)ES(+79.97)TEVFTK.K	Oxidation (M) ; Phosphorylation (STY)	15	1824.82	609.283	3	64.73	25.13	609.286	3	66	x	x	x	x
P02663	Alpha-S2-casein	150	164	N.SKKTVDMES(+79.97)TEVFTK.K	Phosphorylation (STY)	15	1808.83	603.952	3	88.19	31.92	603.956	3	81.4		x	x	x
P02663	Alpha-S2-casein	150	165	N.SKKTVDM(+15.99)ES(+79.97)TEVFTKK.T	Oxidation (M) ; Phosphorylation (STY)	16	1952.92	489.238	4	112.36	22.48	489.239	4	50.94		x	x	x
P02663	Alpha-S2-casein	150	165	N.SKKTVDMES(+79.97)TEVFTKK.T	Phosphorylation (STY)	16	1936.92	485.237	4	113.76	29.18	646.655	3	79.03	x		x	x
P02663	Alpha-S2-casein	150	165	N.SKKTVDMESTEVFTKK.T		16	1856.96	465.247	4	120.65	28.04	465.248	4	73.55			x	x
P02663	Alpha-S2-casein	150	167	N.SKKTVDMES(+79.97)TEVFTKKTK.L	Phosphorylation (STY)	18	2166.06	542.525	4	121.54	26.88	542.528	4	50.59			x	x
P02663	Alpha-S2-casein	150	179	N.SKKTVDMES(+79.97)TEVFTKKTKLTEEEKNRLNFL.K	Phosphorylation (STY)	30	3652.84	731.578	5	91.08	44.2	731.577	5	62.6			x
P02663	Alpha-S2-casein	152	164	K.KTVDMES(+79.97)TEVFTK.K	Phosphorylation (STY)	13	1593.7	532.241	3	106.59	35.71	797.866	2	72.25	x	x	x	x
P02663	Alpha-S2-casein	152	165	K.KTVDM(+15.99)ES(+79.97)TEVFTKK.T	Oxidation (M) ; Phosphorylation (STY)	14	1737.79	580.271	3	102.34	25.34	580.277	3	73.33	x	x	x	x
P02663	Alpha-S2-casein	152	165	K.KTVDMES(+79.97)TEVFTKK.T	Phosphorylation (STY)	14	1721.79	574.94	3	105.56	32.19	574.947	3	87.78	x	x	x	x
P02663	Alpha-S2-casein	152	165	K.KTVDMESTEVFTKK.T		14	1641.83	548.284	3	106.81	31.14	548.286	3	75.98	x	x	x	x
P02663	Alpha-S2-casein	152	166	K.KTVDMES(+79.97)TEVFTKKT.K	Phosphorylation (STY)	15	1822.84	608.622	3	50.4	32.81	608.624	3	53.72	x	x		x
P02663	Alpha-S2-casein	152	166	K.KTVDMEST(+79.97)EVFTKKT.K	Phosphorylation (STY)	15	1822.84	608.622	3	37.47	32.86	608.623	3	51.25	x
P02663	Alpha-S2-casein	152	167	K.KTVDM(+15.99)ES(+79.97)TEVFTKKTK.L	Oxidation (M) ; Phosphorylation (STY)	16	1966.93	492.741	4	85.17	23.61	492.74	4	43.43	x	x
P02663	Alpha-S2-casein	152	167	K.KTVDMES(+79.97)TEVFTKKTK.L	Phosphorylation (STY)	16	1950.94	488.742	4	118.51	29.77	488.742	4	68.39	x	x
P02663	Alpha-S2-casein	152	179	K.KTVDMES(+79.97)TEVFTKKTKLTEEEKNRLNFL.K	Phosphorylation (STY)	28	3437.72	688.553	5	65.94	46.18	688.555	5	52.93	x	x	x
P02663	Alpha-S2-casein	153	164	K.TVDM(+15.99)ESTEVFTK.K	Oxidation (M)	12	1401.63	701.826	2	36.27	31.39	701.833	2	79.07	x	x
P02663	Alpha-S2-casein	153	164	K.TVDMESTEVFTK.K		12	1385.64	693.829	2	41.94	38.61	693.829	2	70.44	x		x
P02663	Alpha-S2-casein	153	165	K.TVDM(+15.99)ES(+79.97)TEVFTKK.T	Oxidation (M) ; Phosphorylation (STY)	13	1609.69	537.573	3	95.78	28.37	537.574	3	41.23	x	x		x
P02663	Alpha-S2-casein	153	165	K.TVDMES(+79.97)TEVFTKK.T	Phosphorylation (STY)	13	1593.7	532.241	3	74.15	35.64	532.245	3	58.3	x		x	x
P02663	Alpha-S2-casein	153	165	K.TVDMESTEVFTKK.T		13	1513.73	505.585	3	95.96	34.92	505.589	3	66.95	x	x	x	x
P02663	Alpha-S2-casein	154	164	T.VDM(+15.99)ES(+79.97)TEVFTK.K	Oxidation (M) ; Phosphorylation (STY)	11	1380.55	691.285	2	21.94	31.37	691.286	2	60.11	x
P02663	Alpha-S2-casein	154	164	T.VDM(+15.99)ESTEVFTK.K	Oxidation (M)	11	1300.59	651.3	2	25.04	29.57	651.306	2	61.56	x	x
P02663	Alpha-S2-casein	154	164	T.VDMES(+79.97)TEVFTK.K	Phosphorylation (STY)	11	1364.56	683.287	2	25.8	39.9	683.289	2	65.8	x
P02663	Alpha-S2-casein	154	164	T.VDMESTEVFTK.K		11	1284.59	643.304	2	38.85	37.64	643.307	2	68.05	x	x
P02663	Alpha-S2-casein	154	165	T.VDM(+15.99)ES(+79.97)TEVFTKK.T	Oxidation (M) ; Phosphorylation (STY)	12	1508.65	503.889	3	78.49	27.45	503.893	3	49.12	x		x
P02663	Alpha-S2-casein	156	164	D.M(+15.99)ES(+79.97)TEVFTK.K	Oxidation (M) ; Phosphorylation (STY)	9	1166.46	584.236	2	43.11	27.55	584.232	2	46.88	x	x		x
P02663	Alpha-S2-casein	156	164	D.MES(+79.97)TEVFTK.K	Phosphorylation (STY)	9	1150.46	576.239	2	46.63	31.87	576.242	2	58.46	x	x	x	x
P02663	Alpha-S2-casein	157	164	M.ESTEVFTK.K		8	939.455	470.735	2	42.33	22.64	470.735	2	53.2		x		x
P02663	Alpha-S2-casein	163	177	F.TKKTKLTEEEKNRLN.F		15	1831.02	458.762	4	96.3	17.57	458.765	4	34.59	x	x	x	x
P02663	Alpha-S2-casein	163	179	F.TKKTKLTEEEKNRLNFL.K		17	2091.17	523.8	4	96.56	34.44	523.801	4	34.71	x	x	x
P02663	Alpha-S2-casein	165	176	K.KTKLTEEEKNRL.N		12	1487.83	496.952	3	82.04	20.01	496.952	3	53.64	x	x	x	x
P02663	Alpha-S2-casein	165	177	K.KTKLTEEEKNRLN.F		13	1601.87	534.965	3	86.42	18.47	401.479	4	63.54	x	x	x	x
P02663	Alpha-S2-casein	165	178	K.KTKLTEEEKNRLNF.L		14	1748.94	438.243	4	104.95	29.15	438.252	4	72.72	x	x		x
P02663	Alpha-S2-casein	165	179	K.KTKLTEEEKNRLNFL.K		15	1862.03	621.684	3	95.4	36.49	621.686	3	71.96	x	x	x	x
P02663	Alpha-S2-casein	165	180	K.KTKLTEEEKNRLNFLK.K		16	1990.12	498.538	4	127.85	32.3	498.54	4	61.41	x	x	x	x
P02663	Alpha-S2-casein	166	176	K.TKLTEEEKNRL.N		11	1359.74	454.254	3	77.98	22.9	454.257	3	69.7	x	x	x	x
P02663	Alpha-S2-casein	166	177	K.TKLTEEEKNRLN.F		12	1473.78	492.269	3	83.2	20.83	492.277	3	63.72	x	x	x	x
P02663	Alpha-S2-casein	166	178	K.TKLTEEEKNRLNF.L		13	1620.85	406.22	4	104.16	32.74	541.295	3	71.22	x	x	x	x
P02663	Alpha-S2-casein	166	179	K.TKLTEEEKNRLNFL.K		14	1733.93	434.491	4	106.41	40.11	578.993	3	74.25	x	x	x	x
P02663	Alpha-S2-casein	166	180	K.TKLTEEEKNRLNFLK.K		15	1862.03	621.686	3	108.24	35.13	621.685	3	87.23	x	x	x	x
P02663	Alpha-S2-casein	166	181	K.TKLTEEEKNRLNFLKK.I		16	1990.12	498.538	4	80.6	32.5	399.037	5	37.51	x	x
P02663	Alpha-S2-casein	166	182	K.TKLTEEEKNRLNFLKKI.S		17	2103.21	526.81	4	114.43	40.27	526.81	4	48.74	x		x
P02663	Alpha-S2-casein	166	184	K.TKLTEEEKNRLNFLKKISQ.R		19	2318.3	580.584	4	109.75	39.34	580.587	4	61.85	x	x		x
P02663	Alpha-S2-casein	167	178	T.KLTEEEKNRLNF.L		12	1519.8	507.608	3	87.61	30.41	507.607	3	56.81	x	x	x	x
P02663	Alpha-S2-casein	167	179	T.KLTEEEKNRLNFL.K		13	1632.88	545.304	3	88.02	38.05	545.307	3	68.53	x	x	x	x
P02663	Alpha-S2-casein	167	180	T.KLTEEEKNRLNFLK.K		14	1760.98	441.252	4	75.77	33.63	441.257	4	45.76	x	x
P02663	Alpha-S2-casein	168	177	K.LTEEEKNRLN.F		10	1244.64	415.887	3	60.36	18.5	623.32	2	40.37	x	x	x	x
P02663	Alpha-S2-casein	168	178	K.LTEEEKNRLNF.L		11	1391.7	464.911	3	73	32.12	464.912	3	63.03	x	x	x	x
P02663	Alpha-S2-casein	168	179	K.LTEEEKNRLNFL.K		12	1504.79	502.604	3	69.37	41.61	753.403	2	76.96	x	x	x	x
P02663	Alpha-S2-casein	168	180	K.LTEEEKNRLNFLK.K		13	1632.88	409.229	4	95.87	35.63	545.306	3	65.34	x	x	x	x
P02663	Alpha-S2-casein	168	184	K.LTEEEKNRLNFLKKISQ.R		17	2089.15	523.296	4	105.45	40.45	523.298	4	32.72	x	x	x	x
P02663	Alpha-S2-casein	169	178	L.TEEEKNRLNF.L		10	1278.62	427.213	3	64.22	28.1	427.218	3	45.97	x	x	x	x
P02663	Alpha-S2-casein	169	179	L.TEEEKNRLNFL.K		11	1391.7	464.909	3	67.95	38.95	696.861	2	68.64	x	x	x	x
P02663	Alpha-S2-casein	169	180	L.TEEEKNRLNFLK.K		12	1519.8	507.608	3	77.39	31.22	507.606	3	48.38	x	x	x	x
P02663	Alpha-S2-casein	170	178	T.EEEKNRLNF.L		9	1177.57	589.793	2	36.22	27.59	589.799	2	41.68	x	x	x	x
P02663	Alpha-S2-casein	170	179	T.EEEKNRLNFL.K		10	1290.66	431.228	3	49.8	38.89	646.338	2	65.27	x	x		x
P02663	Alpha-S2-casein	177	184	L.NFLKKISQ.R		8	976.571	489.292	2	47.77	28.54	489.293	2	46.21	x	x
P02663	Alpha-S2-casein	183	193	I.SQRYQKFALPQ.Y		11	1364.72	455.915	3	68.02	33.21	455.914	3	47.24			x
P02663	Alpha-S2-casein	185	194	Q.RYQKFALPQY.L		10	1312.69	438.572	3	48.74	39.33	657.353	2	50.78	x	x		x
P02663	Alpha-S2-casein	186	193	R.YQKFALPQ.Y		8	993.528	497.772	2	33.33	36.47	497.773	2	52.03			x
P02663	Alpha-S2-casein	186	194	R.YQKFALPQY.L		9	1156.59	579.305	2	29.83	43.96	579.308	2	64.44	x	x		x
P02663	Alpha-S2-casein	186	195	R.YQKFALPQYL.K		10	1269.68	635.847	2	28.24	52.86	635.845	2	56.68	x	x
P02663	Alpha-S2-casein	190	197	F.ALPQYLKT.V		8	932.533	467.274	2	27.87	35.95	467.272	2	50.75	x		x
P02663	Alpha-S2-casein	191	197	A.LPQYLKT.V		7	861.496	431.756	2	35.3	33.42	431.757	2	51.14	x		x
P02663	Alpha-S2-casein	197	212	K.TVYQHQKAMKPWIQPK.T		16	1982.06	496.522	4	94.43	29.29	496.523	4	40.99	x	x
P02663	Alpha-S2-casein	200	212	Y.QHQKAM(+15.99)KPWIQPK.T	Oxidation (M)	13	1634.87	409.725	4	60.07	20.21	409.726	4	57.65	x	x
P02663	Alpha-S2-casein	200	212	Y.QHQKAMKPWIQPK.T		13	1618.88	405.727	4	66.07	24.26	405.723	4	66.61	x	x
P02663	Alpha-S2-casein	203	212	Q.KAMKPWIQPK.T		10	1225.7	409.575	3	49.75	25.82	409.573	3	49.09	x	x	x	x
P02663	Alpha-S2-casein	204	212	K.AMKPWIQPK.T		9	1097.61	549.812	2	32.05	30.41	549.815	2	52.27	x			x
P02663	Alpha-S2-casein	204	213	K.AM(+15.99)KPWIQPKT.K	Oxidation (M)	10	1214.65	405.891	3	46.9	27.53	405.891	3	53.93	x	x	x	x
P02663	Alpha-S2-casein	204	222	K.AMKPWIQPKTKVIPYVRYL		19	2330.33	583.591	4	95.7	49.86	583.598	4	54.7	x	x
P02663	Alpha-S2-casein	205	212	A.MKPWIQPK.T		8	1026.57	514.292	2	26.56	29.43	514.284	2	39.53			x
P02663	Alpha-S2-casein	205	213	A.MKPWIQPKT.K		9	1127.62	564.816	2	25.1	31.64	376.885	3	46.62			x
P02663	Alpha-S2-casein	205	214	A.MKPWIQPKTK.V		10	1255.71	419.578	3	56.02	26.27	419.578	3	50.46	x	x	x
P02663	Alpha-S2-casein	206	217	M.KPWIQPKTKVIP.Y		12	1433.88	478.967	3	61.42	34.25	478.969	3	55.42	x	x		x
P02663	Alpha-S2-casein	206	218	M.KPWIQPKTKVIPY.V		13	1596.94	533.321	3	68.6	38.36	533.327	3	35.86	x
P02663	Alpha-S2-casein	209	217	W.IQPKTKVIP.Y		9	1022.65	512.333	2	26.85	25.19	512.333	2	37.52	x		x
P02663	Alpha-S2-casein	209	218	W.IQPKTKVIPY.V		10	1185.71	593.864	2	27.97	30.57	593.865	2	44.34	x	x	x
P02663	Alpha-S2-casein	213	219	K.TKVIPYV.R		7	818.49	410.254	2	30.95	37.4	410.255	2	48	x	x	x	x
P02663	Alpha-S2-casein	213	220	K.TKVIPYVR.Y		8	974.591	488.304	2	31.46	28.36	488.299	2	44.15	x	x		x
P02663	Alpha-S2-casein	213	221	K.TKVIPYVRY.L		9	1137.65	569.836	2	26.44	35.67	569.839	2	34.46	x	x
P02663	Alpha-S2-casein	213	222	K.TKVIPYVRYL		10	1250.74	417.922	3	79.43	44.21	417.921	3	56.78	x	x	x	x
P02663	Alpha-S2-casein	215	222	K.VIPYVRYL		8	1021.6	511.806	2	43.96	50.06	511.81	2	42.76	x	x	x	x
P02663	Alpha-S2-casein	216	222	V.IPYVRYL		7	922.528	462.273	2	38.68	45.2	462.277	2	46.3	x	x		x
P15497	Apolipoprotein A-I	253	265	L.AAIDEASKKLNAQ		13	1357.72	453.581	3	81.36	26.31	679.869	2	75.02	x	x		x
P15497	Apolipoprotein A-I	255	265	A.IDEASKKLNAQ		11	1215.65	608.831	2	24.46	26.31	608.833	2	63.77	x	x		x
P81644	Apolipoprotein A-II	87	99	F.LSSFIDPKKQPAT.R		13	1430.78	477.934	3	62.63	31.79	477.936	3	78.03	x	x		x
P01888	Beta-2-microglobulin	21	30	A.IQRPPKIQVY.S		10	1240.73	414.584	3	56.69	33.33	621.372	2	59.51	x	x		x
P02666	Beta-casein	16	26	A.RELEELNVPGE.I		11	1283.64	642.827	2	25.1	38.12	642.837	2	53.69	x	x	x	x
P02666	Beta-casein	16	43	A.RELEELNVPGEIVESLSS(+79.97)S(+79.97)EESITRINK.K	Phosphorylation (STY)	28	3316.55	830.147	4	38.37	59.15	1106.53	3	84.31	x	x	x	x
P02666	Beta-casein	16	43	A.RELEELNVPGEIVESLSSS(+79.97)EESITRINK.K	Phosphorylation (STY)	28	3236.58	810.155	4	32.21	58.98	1079.87	3	77.8	x	x	x	x
P02666	Beta-casein	16	43	A.RELEELNVPGEIVESLSSSEESITRINK.K		28	3156.61	790.165	4	60.78	64.7	790.166	4	90.18	x	x	x	x
P02666	Beta-casein	27	43	E.IVESLSS(+79.97)S(+79.97)EESITRINK.K	Phosphorylation (STY)	17	2050.92	684.653	3	67.29	41.82	1026.48	2	64.78			x	x
P02666	Beta-casein	31	40	S.LSSSEESITR.I		10	1107.54	554.78	2	25.85	22.45	554.782	2	47.92				x
P02666	Beta-casein	32	42	L.SSS(+79.97)EESITRIN.K	Phosphorylation (STY)	11	1301.55	651.783	2	26.12	30	651.785	2	45.35	x
P02666	Beta-casein	32	43	L.SS(+79.97)S(+79.97)EESITRINK.K	Phosphorylation (STY)	12	1509.61	504.211	3	37.82	28.95	755.816	2	55.08	x
P02666	Beta-casein	32	43	L.SSSEESITRINK.K		12	1349.68	450.899	3	69.46	23.01	450.903	3	46.36	x		x	x
P02666	Beta-casein	33	43	S.S(+79.97)S(+79.97)EESITRINK.K	Phosphorylation (STY)	11	1422.58	475.202	3	32.7	28.32	712.307	2	56.24	x	x	x	x
P02666	Beta-casein	34	42	S.S(+79.97)EESITRIN.K	Phosphorylation (STY)	9	1127.49	564.751	2	30.59	29.28	564.755	2	50.71			x	x
P02666	Beta-casein	34	42	S.SEESITRIN.K		9	1047.52	524.769	2	39.43	25.18	524.761	2	50.24	x	x	x	x
P02666	Beta-casein	34	43	S.S(+79.97)EESITRINK.K	Phosphorylation (STY)	10	1255.58	419.536	3	64.76	24.53	628.806	2	63.39	x	x	x	x
P02666	Beta-casein	34	43	S.SEESITRINK.K		10	1175.61	588.817	2	27.85	21.29	392.88	3	47.55				x
P02666	Beta-casein	34	44	S.S(+79.97)EESITRINKK.I	Phosphorylation (STY)	11	1383.68	462.234	3	32.16	20.74	462.238	3	36.47				x
P02666	Beta-casein	35	42	S.EESITRIN.K		8	960.488	481.251	2	41.01	24.35	481.254	2	51.62	x	x	x	x
P02666	Beta-casein	36	42	E.ESITRIN.K		7	831.445	416.731	2	25.51	21.66	416.733	2	41.05				x
P02666	Beta-casein	41	63	R.INKKIEKFQS(+79.97)EEQQQTEDELQDK.I	Phosphorylation (STY)	23	2914.36	729.6	4	58.47	34.73	972.471	3	69.61	x	x	x	x
P02666	Beta-casein	43	68	N.KKIEKFQS(+79.97)EEQQQTEDELQDKIHPFA.Q	Phosphorylation (STY)	26	3252.53	651.516	5	57.68	42.6	814.142	4	78.8			x	x
P02666	Beta-casein	43	72	N.KKIEKFQS(+79.97)EEQQQTEDELQDKIHPFAQTQS.L	Phosphorylation (STY)	30	3696.73	740.357	5	68.48	41.55	925.196	4	65.54			x	x
P02666	Beta-casein	44	54	K.KIEKFQS(+79.97)EEQQ.Q	Phosphorylation (STY)	11	1472.65	491.893	3	43.35	21.94	737.337	2	57.74	x	x	x	x
P02666	Beta-casein	44	55	K.KIEKFQS(+79.97)EEQQQ.T	Phosphorylation (STY)	12	1600.71	534.58	3	45.29	22.22	801.363	2	66.09	x	x	x	x
P02666	Beta-casein	44	55	K.KIEKFQSEEQQQ.T		12	1520.75	507.925	3	47.84	19.46	507.924	3	42.4	x	x	x	x
P02666	Beta-casein	44	58	K.KIEKFQS(+79.97)EEQQQTED.E	Phosphorylation (STY)	15	1945.83	649.621	3	38.88	24.86	973.925	2	57.92	x			x
P02666	Beta-casein	44	63	K.KIEKFQS(+79.97)EEQQQTEDELQDK.I	Phosphorylation (STY)	20	2559.14	640.794	4	90.9	32.92	854.067	3	87.03	x	x	x	x
P02666	Beta-casein	44	63	K.KIEKFQSEEQQQTEDELQDK.I		20	2479.17	620.801	4	125.36	30.62	827.403	3	90.75	x	x	x	x
P02666	Beta-casein	44	65	K.KIEKFQS(+79.97)EEQQQTEDELQDKIH.P	Phosphorylation (STY)	22	2809.28	703.33	4	102.1	36.74	703.334	4	60.06	x	x	x	x
P02666	Beta-casein	44	66	K.KIEKFQS(+79.97)EEQQQTEDELQDKIHP.F	Phosphorylation (STY)	23	2906.33	727.595	4	72.51	39.34	727.595	4	62.29		x	x	x
P02666	Beta-casein	44	67	K.KIEKFQS(+79.97)EEQQQTEDELQDKIHPF.A	Phosphorylation (STY)	24	3053.4	764.362	4	80.23	45.2	764.367	4	76.7	x	x	x	x
P02666	Beta-casein	44	67	K.KIEKFQSEEQQQTEDELQDKIHPF.A		24	2973.44	744.371	4	87.79	43.38	744.365	4	69.82	x	x	x	x
P02666	Beta-casein	44	68	K.KIEKFQS(+79.97)EEQQQTEDELQDKIHPFA.Q	Phosphorylation (STY)	25	3124.44	782.122	4	75.72	41.68	1042.49	3	84.73	x	x	x	x
P02666	Beta-casein	44	68	K.KIEKFQSEEQQQTEDELQDKIHPFA.Q		25	3044.47	762.13	4	85.1	39.56	762.131	4	67.6	x		x	x
P02666	Beta-casein	44	69	K.KIEKFQS(+79.97)EEQQQTEDELQDKIHPFAQ.T	Phosphorylation (STY)	26	3252.5	814.135	4	61.04	44.76	814.133	4	77.72	x		x	x
P02666	Beta-casein	44	70	K.KIEKFQS(+79.97)EEQQQTEDELQDKIHPFAQT.Q	Phosphorylation (STY)	27	3353.55	839.399	4	56.06	44.66	839.398	4	85.83	x	x	x	x
P02666	Beta-casein	44	70	K.KIEKFQSEEQQQTEDELQDKIHPFAQT.Q		27	3273.58	819.406	4	71.01	43.27	819.406	4	71.6			x	x
P02666	Beta-casein	44	71	K.KIEKFQS(+79.97)EEQQQTEDELQDKIHPFAQTQ.S	Phosphorylation (STY)	28	3481.6	871.412	4	39.69	44.5	871.413	4	82.71	x	x	x	x
P02666	Beta-casein	44	71	K.KIEKFQSEEQQQTEDELQDKIHPFAQTQ.S		28	3401.64	851.42	4	61.68	42.79	851.415	4	75.3	x	x	x	x
P02666	Beta-casein	44	72	K.KIEKFQS(+79.97)EEQQQTEDELQDKIHPFAQTQS.L	Phosphorylation (STY)	29	3568.64	714.736	5	79.36	44.49	1190.56	3	77.58	x	x	x	x
P02666	Beta-casein	44	72	K.KIEKFQSEEQQQTEDELQDKIHPFAQTQS.L		29	3488.67	698.745	5	88.27	42.35	873.178	4	85.8	x	x	x	x
P02666	Beta-casein	45	63	K.IEKFQS(+79.97)EEQQQTEDELQDK.I	Phosphorylation (STY)	19	2431.04	811.357	3	54.88	35.16	811.365	3	75.55	x	x	x	x
P02666	Beta-casein	45	63	K.IEKFQSEEQQQTEDELQDK.I		19	2351.08	784.704	3	71.46	32.53	784.704	3	75.29	x	x	x	x
P02666	Beta-casein	45	67	K.IEKFQS(+79.97)EEQQQTEDELQDKIHPF.A	Phosphorylation (STY)	23	2925.31	732.338	4	44.25	47.84	976.117	3	67.22	x	x		x
P02666	Beta-casein	45	68	K.IEKFQS(+79.97)EEQQQTEDELQDKIHPFA.Q	Phosphorylation (STY)	24	2996.34	750.096	4	50.96	47.81	999.793	3	80.72			x	x
P02666	Beta-casein	45	68	K.IEKFQSEEQQQTEDELQDKIHPFA.Q		24	2916.38	730.105	4	88.3	45.85	730.107	4	78.6			x	x
P02666	Beta-casein	45	72	K.IEKFQS(+79.97)EEQQQTEDELQDKIHPFAQTQS.L	Phosphorylation (STY)	28	3440.54	861.146	4	23.64	46.59	1147.86	3	71.33			x	x
P02666	Beta-casein	47	63	E.KFQS(+79.97)EEQQQTEDELQDK.I	Phosphorylation (STY)	17	2188.92	730.649	3	63.24	31.91	730.649	3	63.41	x	x	x	x
P02666	Beta-casein	48	63	K.FQS(+79.97)EEQQQTEDELQDK.I	Phosphorylation (STY)	16	2060.82	687.949	3	79.08	34.02	1031.42	2	84.08	x	x	x	x
P02666	Beta-casein	48	63	K.FQSEEQQQTEDELQDK.I		16	1980.85	661.294	3	104.17	30.5	991.439	2	94.24	x	x	x	x
P02666	Beta-casein	56	67	Q.TEDELQDKIHPF.A		12	1470.7	491.239	3	77.95	40.89	491.243	3	44.44	x
P02666	Beta-casein	56	68	Q.TEDELQDKIHPFA.Q		13	1541.74	514.922	3	86.12	39.97	514.921	3	64.89			x	x
P02666	Beta-casein	62	71	Q.DKIHPFAQTQ.S		10	1183.6	592.807	2	25.39	25.31	592.809	2	74.37	x	x
P02666	Beta-casein	64	71	K.IHPFAQTQ.S		8	940.477	471.246	2	37.96	25.4	471.245	2	48.67	x	x	x	x
P02666	Beta-casein	64	72	K.IHPFAQTQS.L		9	1027.51	514.761	2	33.08	25.4	514.767	2	59.83	x	x	x	x
P02666	Beta-casein	88	108	Q.NIPPLTQTPVVVPPFLQPEVM.G		21	2315.26	772.763	3	47.93	73.66	1158.64	2	54.8	x	x		x
P02666	Beta-casein	99	110	V.VPPFLQPEVM(+15.99)GV.S	Oxidation (M)	12	1327.68	664.852	2	23.48	55.06	664.852	2	73.39	x	x	x
P02666	Beta-casein	99	110	V.VPPFLQPEVMGV.S		12	1311.69	656.854	2	32.05	62.3	656.859	2	70.79	x	x	x	x
P02666	Beta-casein	106	120	P.EVMGVSKVKEAMAPK.H		15	1602.85	535.291	3	85.41	32.7	535.293	3	57.57				x
P02666	Beta-casein	107	120	E.VMGVSKVKEAMAPK.H		14	1473.8	492.277	3	94.66	29.37	492.277	3	62.25	x	x	x	x
P02666	Beta-casein	108	120	V.MGVSKVKEAM(+15.99)APK.H	Oxidation (M)	13	1390.73	464.586	3	73.09	20.06	464.578	3	32.24				x
P02666	Beta-casein	108	120	V.MGVSKVKEAMAPK.H		13	1374.74	459.254	3	88.8	24.92	459.255	3	61.59			x	x
P02666	Beta-casein	109	119	M.GVSKVKEAMAP.K		11	1115.6	558.808	2	25.55	23.16	558.81	2	48.61		x		x
P02666	Beta-casein	109	120	M.GVSKVKEAMAPK.H		12	1243.7	415.574	3	50.8	18.83	415.579	3	54.25	x	x	x	x
P02666	Beta-casein	111	138	V.SKVKEAMAPKHKEMPFPKYPVEPFTESQ.S		28	3259.64	652.938	5	58.45	40.21	652.941	5	41.97			x
P02666	Beta-casein	111	140	V.SKVKEAMAPKHKEMPFPKYPVEPFTESQSL.T		30	3459.76	692.962	5	39.72	44.17	692.96	5	42.94	x		x	x
P02666	Beta-casein	113	128	K.VKEAMAPKHKEMPFPK.Y		16	1866.98	467.755	4	71.04	24.85	467.757	4	40.58	x	x		x
P02666	Beta-casein	117	138	A.MAPKHKEMPFPKYPVEPFTESQ.S		22	2617.27	655.327	4	37.29	42.46	655.33	4	53.47			x
P02666	Beta-casein	117	140	A.MAPKHKEMPFPKYPVEPFTESQSL.T		24	2817.39	705.357	4	65.37	46.8	705.356	4	48.53			x
P02666	Beta-casein	121	129	K.HKEMPFPKY.P		9	1175.58	588.799	2	26.28	30.1	392.871	3	56.88	x	x		x
P02666	Beta-casein	121	134	K.HKEM(+15.99)PFPKYPVEPF.T	Oxidation (M)	14	1760.86	587.962	3	41.87	42.65	587.961	3	53.72	x	x
P02666	Beta-casein	121	134	K.HKEMPFPKYPVEPF.T		14	1744.86	582.63	3	54.89	46.24	582.631	3	70.64	x	x	x
P02666	Beta-casein	121	138	K.HKEMPFPKYPVEPFTESQ.S		18	2190.05	731.025	3	44.03	44.78	731.025	3	82.22	x		x	x
P02666	Beta-casein	121	139	K.HKEM(+15.99)PFPKYPVEPFTESQS.L	Oxidation (M)	19	2293.07	574.277	4	50.24	41.36	765.368	3	38.21		x	x
P02666	Beta-casein	121	139	K.HKEMPFPKYPVEPFTESQS.L		19	2277.08	570.278	4	48.04	44.72	760.035	3	74.55	x	x	x	x
P02666	Beta-casein	121	140	K.HKEM(+15.99)PFPKYPVEPFTESQSL.T	Oxidation (M)	20	2406.16	602.548	4	68.96	46.58	803.064	3	72.79	x	x
P02666	Beta-casein	121	140	K.HKEMPFPKYPVEPFTESQSL.T		20	2390.16	598.551	4	74.2	48.73	797.736	3	89.73	x	x	x	x
P02666	Beta-casein	121	153	K.HKEMPFPKYPVEPFTESQSLTLTDVENLHLPLP.L		33	3832.94	767.599	5	84.92	66.72	959.248	4	60.29	x		x	x
P02666	Beta-casein	123	129	K.EM(+15.99)PFPKY.P	Oxidation (M)	7	926.421	464.218	2	27.02	32.56	464.22	2	44.18		x
P02666	Beta-casein	123	139	K.EMPFPKYPVEPFTESQS.L		17	2011.92	671.652	3	37.39	53.05	1006.97	2	85.76	x		x	x
P02666	Beta-casein	124	134	E.MPFPKYPVEPF.T		11	1350.67	676.343	2	27.82	55	676.35	2	68.45	x	x
P02666	Beta-casein	124	140	E.MPFPKYPVEPFTESQSL.T		17	1995.97	666.331	3	25.49	56.82	998.994	2	98.46	x	x
P02666	Beta-casein	130	139	Y.PVEPFTESQS.L		10	1119.51	560.762	2	50.24	33.77	560.763	2	67.44	x	x	x	x
P02666	Beta-casein	130	140	Y.PVEPFTESQSL.T		11	1232.59	617.304	2	36.89	45.06	617.306	2	65.01	x	x	x	x
P02666	Beta-casein	140	153	S.LTLTDVENLHLPLP.L		14	1573.87	525.633	3	53.23	66.15	787.95	2	79.83			x	x
P02666	Beta-casein	141	158	L.TLTDVENLHLPLPLLQSW.M		18	2088.13	697.053	3	48.27	75.51	1045.08	2	94.54	x	x		x
P02666	Beta-casein	142	153	T.LTDVENLHLPLP.L		12	1359.74	680.881	2	26.25	56.37	680.881	2	72.17			x	x
P02666	Beta-casein	147	158	E.NLHLPLPLLQSW.M		12	1429.81	715.914	2	27.37	71.22	715.917	2	77.57	x	x
P02666	Beta-casein	149	158	L.HLPLPLLQSW.M		10	1202.68	602.35	2	30.87	63.92	602.353	2	77.81		x
P02666	Beta-casein	150	158	H.LPLPLLQSW.M		9	1065.62	533.82	2	22.63	71.16	533.82	2	66.36	x	x
P02666	Beta-casein	154	160	P.LLQSWMH.Q		7	913.448	457.733	2	28.05	39.49	457.734	2	45.27				x
P02666	Beta-casein	154	161	P.LLQSWM(+15.99)HQ.P	Oxidation (M)	8	1057.5	529.76	2	34.06	32.28	529.767	2	38.35			x	x
P02666	Beta-casein	154	161	P.LLQSWMHQ.P		8	1041.51	521.762	2	39.3	39.84	521.764	2	52.52			x	x
P02666	Beta-casein	154	162	P.LLQSWMHQP.H		9	1138.56	570.288	2	41.73	42.14	570.291	2	57.89			x	x
P02666	Beta-casein	154	163	P.LLQSWMHQPH.Q		10	1275.62	426.214	3	62.94	36.31	638.818	2	69.82			x	x
P02666	Beta-casein	154	164	P.LLQSWMHQPHQ.P		11	1403.68	468.901	3	75.99	35.97	468.906	3	62.56			x	x
P02666	Beta-casein	154	165	P.LLQSWMHQPHQP.L		12	1500.73	501.252	3	57.51	37.41	501.253	3	36.43			x
P02666	Beta-casein	154	168	P.LLQSWMHQPHQPLPP.T		15	1807.92	603.649	3	51.61	43.15	603.648	3	76.68			x
P02666	Beta-casein	154	169	P.LLQSWM(+15.99)HQPHQPLPPT.V	Oxidation (M)	16	1924.96	642.664	3	49.06	37.62	963.494	2	78.51			x	x
P02666	Beta-casein	154	169	P.LLQSWMHQPHQPLPPT.V		16	1908.97	637.333	3	74.71	42.75	955.495	2	88.15			x	x
P02666	Beta-casein	154	170	P.LLQSWMHQPHQPLPPTV.M		17	2008.04	670.355	3	56.55	46.66	670.356	3	74.51			x
P02666	Beta-casein	155	169	L.LQSWM(+15.99)HQPHQPLPPT.V	Oxidation (M)	15	1811.88	604.968	3	65.51	33.35	906.951	2	70.39			x
P02666	Beta-casein	155	169	L.LQSWMHQPHQPLPPT.V		15	1795.88	599.637	3	77.01	39.53	898.955	2	78.35			x
P02666	Beta-casein	157	169	Q.SWM(+15.99)HQPHQPLPPT.V	Oxidation (M)	13	1570.74	524.587	3	59.3	29.21	524.587	3	59.93			x
P02666	Beta-casein	157	169	Q.SWMHQPHQPLPPT.V		13	1554.74	519.255	3	63.53	33.86	778.381	2	77.63			x
P02666	Beta-casein	158	169	S.WM(+15.99)HQPHQPLPPT.V	Oxidation (M)	12	1483.7	495.575	3	45.75	27.82	495.575	3	41.42			x
P02666	Beta-casein	158	169	S.WMHQPHQPLPPT.V		12	1467.71	490.244	3	73.25	31.64	734.87	2	70.92			x
P02666	Beta-casein	159	169	W.M(+15.99)HQPHQPLPPT.V	Oxidation (M)	11	1297.62	433.55	3	45.22	21.15	649.824	2	61.06		x	x	x
P02666	Beta-casein	159	169	W.MHQPHQPLPPT.V		11	1281.63	428.217	3	54.94	24.27	641.827	2	66.66	x	x	x	x
P02666	Beta-casein	159	171	W.MHQPHQPLPPTVM(+15.99).F	Oxidation (M)	13	1527.73	510.252	3	32.94	27.98	510.251	3	56.28		x
P02666	Beta-casein	159	184	W.MHQPHQPLPPTVMFPPQSVLSLSQSK.V		26	2910.49	728.632	4	57.44	53.38	728.634	4	84.31	x	x
P02666	Beta-casein	170	179	T.VMFPPQSVLS.L		10	1103.57	552.793	2	30.15	52.62	552.792	2	66.92			x
P02666	Beta-casein	170	184	T.VMFPPQSVLSLSQSK.V		15	1646.87	549.966	3	39.9	52.31	824.444	2	77.92			x
P02666	Beta-casein	173	184	F.PPQSVLSLSQSK.V		12	1269.69	635.855	2	44.76	35.08	635.855	2	79.29		x
P02666	Beta-casein	176	184	Q.SVLSLSQSK.V		9	947.529	474.772	2	51.98	29.9	474.78	2	49.89	x	x	x	x
P02666	Beta-casein	176	190	Q.SVLSLSQSKVLPVPQ.K		15	1580.91	791.468	2	37.87	49.17	791.471	2	85.15			x
P02666	Beta-casein	177	184	S.VLSLSQSK.V		8	860.497	431.257	2	37.17	23.95	431.258	2	50.61			x	x
P02666	Beta-casein	177	185	S.VLSLSQSKV.L		9	959.565	480.791	2	38.14	32.8	480.793	2	49.36			x
P02666	Beta-casein	177	187	S.VLSLSQSKVLP.V		11	1169.7	585.86	2	31.51	43.42	585.866	2	61.24			x
P02666	Beta-casein	177	189	S.VLSLSQSKVLPVP.Q		13	1365.82	683.922	2	31.53	49.63	683.922	2	74.4			x	x
P02666	Beta-casein	177	190	S.VLSLSQSKVLPVPQ.K		14	1493.88	498.969	3	77.05	46.24	747.961	2	78.51			x	x
P02666	Beta-casein	177	191	S.VLSLSQSKVLPVPQK.A		15	1621.98	541.669	3	87.61	40.21	812	2	77.42			x	x
P02666	Beta-casein	177	192	S.VLSLSQSKVLPVPQKA.V		16	1693.01	565.347	3	59.21	41.52	565.347	3	45.33			x	x
P02666	Beta-casein	177	196	S.VLSLSQSKVLPVPQKAVPYP.Q		20	2149.25	717.429	3	83.67	48.68	717.427	3	82.36			x	x
P02666	Beta-casein	177	197	S.VLSLSQSKVLPVPQKAVPYPQ.R		21	2277.31	760.115	3	59.63	46.82	760.118	3	70.25	x		x	x
P02666	Beta-casein	177	201	S.VLSLSQSKVLPVPQKAVPYPQRDMP.I		25	2776.53	695.143	4	68.85	47.35	695.144	4	81.44			x	x
P02666	Beta-casein	177	203	S.VLSLSQSKVLPVPQKAVPYPQRDMPIQ.A		27	3017.67	755.429	4	76.65	48.67	755.427	4	59.4			x	x
P02666	Beta-casein	177	204	S.VLSLSQSKVLPVPQKAVPYPQRDM(+15.99)PIQA.F	Oxidation (M)	28	3104.71	777.188	4	53.51	46.01	777.188	4	71.87			x	x
P02666	Beta-casein	177	204	S.VLSLSQSKVLPVPQKAVPYPQRDMPIQA.F		28	3088.71	773.19	4	67.11	49.21	773.188	4	64.7			x	x
P02666	Beta-casein	177	205	S.VLSLSQSKVLPVPQKAVPYPQRDM(+15.99)PIQAF.L	Oxidation (M)	29	3251.77	813.956	4	24.67	50.83	813.953	4	54.29				x
P02666	Beta-casein	177	205	S.VLSLSQSKVLPVPQKAVPYPQRDMPIQAF.L		29	3235.78	809.959	4	49.97	54.02	1079.6	3	76.44			x	x
P02666	Beta-casein	178	190	V.LSLSQSKVLPVPQ.K		13	1394.81	698.416	2	35.86	44.1	698.424	2	80.28		x	x	x
P02666	Beta-casein	178	191	V.LSLSQSKVLPVPQK.A		14	1522.91	508.645	3	73.18	38.39	508.641	3	83.46	x	x	x	x
P02666	Beta-casein	178	197	V.LSLSQSKVLPVPQKAVPYPQ.R		20	2178.24	727.09	3	56.32	45.55	727.089	3	80.56	x	x	x	x
P02666	Beta-casein	178	205	V.LSLSQSKVLPVPQKAVPYPQRDM(+15.99)PIQAF.L	Oxidation (M)	28	3152.71	789.186	4	53.04	50.03	789.185	4	57.89		x
P02666	Beta-casein	178	205	V.LSLSQSKVLPVPQKAVPYPQRDMPIQAF.L		28	3136.71	785.187	4	70.13	53.34	785.186	4	57.58	x	x		x
P02666	Beta-casein	179	187	L.SLSQSKVLP.V		9	957.549	479.783	2	42.38	31.22	479.783	2	49.49			x
P02666	Beta-casein	179	189	L.SLSQSKVLPVP.Q		11	1153.67	577.844	2	29.99	39.97	577.842	2	57.77		x	x	x
P02666	Beta-casein	179	190	L.SLSQSKVLPVPQ.K		12	1281.73	428.251	3	75.57	36.46	641.885	2	72.94	x	x	x	x
P02666	Beta-casein	179	191	L.SLSQSKVLPVPQK.A		13	1409.82	470.951	3	86.57	30.63	705.927	2	85.22	x	x	x	x
P02666	Beta-casein	179	197	L.SLSQSKVLPVPQKAVPYPQ.R		19	2065.16	689.396	3	76.1	40.4	689.403	3	91.43	x	x	x	x
P02666	Beta-casein	179	201	L.SLSQSKVLPVPQKAVPYPQRDMP.I		23	2564.38	642.104	4	94.52	41.86	642.102	4	74.54			x
P02666	Beta-casein	179	204	L.SLSQSKVLPVPQKAVPYPQRDM(+15.99)PIQA.F	Oxidation (M)	26	2892.55	724.149	4	61.97	41.17	724.148	4	51.61		x	x
P02666	Beta-casein	179	204	L.SLSQSKVLPVPQKAVPYPQRDMPIQA.F		26	2876.56	720.151	4	74.1	44.37	720.148	4	61.46	x	x	x	x
P02666	Beta-casein	179	205	L.SLSQSKVLPVPQKAVPYPQRDM(+15.99)PIQAF.L	Oxidation (M)	27	3039.62	760.917	4	53.29	46.69	1014.22	3	83.33	x	x		x
P02666	Beta-casein	179	205	L.SLSQSKVLPVPQKAVPYPQRDMPIQAF.L		27	3023.63	756.918	4	53.99	50.45	1008.89	3	89.05	x	x	x	x
P02666	Beta-casein	179	206	L.SLSQSKVLPVPQKAVPYPQRDM(+15.99)PIQAFL.L	Oxidation (M)	28	3152.71	789.187	4	51.1	51.88	789.186	4	46.84			x
P02666	Beta-casein	179	206	L.SLSQSKVLPVPQKAVPYPQRDMPIQAFL.L		28	3136.71	785.189	4	36.21	56.03	1046.58	3	56.47		x	x	x
P02666	Beta-casein	179	207	L.SLSQSKVLPVPQKAVPYPQRDMPIQAFLL.Y		29	3249.79	813.46	4	34.75	59.86	813.461	4	55.58		x		x
P02666	Beta-casein	180	189	S.LSQSKVLPVP.Q		10	1066.64	534.328	2	40.49	37.67	534.329	2	55.11			x	x
P02666	Beta-casein	180	190	S.LSQSKVLPVPQ.K		11	1194.7	598.357	2	22.63	34.28	598.367	2	67.47			x	x
P02666	Beta-casein	180	191	S.LSQSKVLPVPQK.A		12	1322.79	441.939	3	64.51	28.54	662.407	2	71.6	x	x	x	x
P02666	Beta-casein	180	196	S.LSQSKVLPVPQKAVPYP.Q		17	1850.07	617.698	3	58.62	41.4	617.698	3	64.47			x	x
P02666	Beta-casein	180	197	S.LSQSKVLPVPQKAVPYPQ.R		18	1978.13	660.386	3	50.22	39	660.388	3	77.86	x	x	x	x
P02666	Beta-casein	180	201	S.LSQSKVLPVPQKAVPYPQRDMP.I		22	2477.35	620.347	4	84.31	40.6	620.347	4	78.64			x	x
P02666	Beta-casein	180	205	S.LSQSKVLPVPQKAVPYPQRDM(+15.99)PIQAF.L	Oxidation (M)	26	2952.59	739.159	4	59.99	45.32	739.158	4	36.1				x
P02666	Beta-casein	180	205	S.LSQSKVLPVPQKAVPYPQRDMPIQAF.L		26	2936.59	735.158	4	77.35	49.73	979.878	3	57.03		x	x	x
P02666	Beta-casein	180	206	S.LSQSKVLPVPQKAVPYPQRDMPIQAFL.L		27	3049.68	763.431	4	46.67	55.51	763.431	4	47			x	x
P02666	Beta-casein	181	190	L.SQSKVLPVPQ.K		10	1081.61	541.815	2	39.94	29.8	541.82	2	59.41	x	x	x	x
P02666	Beta-casein	181	191	L.SQSKVLPVPQK.A		11	1209.71	404.245	3	61	24.21	605.867	2	72.5	x	x	x	x
P02666	Beta-casein	181	192	L.SQSKVLPVPQKA.V		12	1280.75	427.923	3	80.72	26.52	641.384	2	66.23			x
P02666	Beta-casein	181	196	L.SQSKVLPVPQKAVPYP.Q		16	1736.98	580.003	3	31.48	39.15	579.989	3	73.06			x
P02666	Beta-casein	181	197	L.SQSKVLPVPQKAVPYPQ.R		17	1865.04	622.69	3	69.88	37.09	622.693	3	92.09	x	x	x	x
P02666	Beta-casein	181	201	L.SQSKVLPVPQKAVPYPQRDMP.I		21	2364.26	592.075	4	96.34	39.03	592.08	4	79.2			x
P02666	Beta-casein	181	203	L.SQSKVLPVPQKAVPYPQRDMPIQ.A		23	2605.41	652.361	4	72.43	41.18	652.363	4	61.2			x
P02666	Beta-casein	181	204	L.SQSKVLPVPQKAVPYPQRDM(+15.99)PIQA.F	Oxidation (M)	24	2692.44	674.12	4	81.75	38.61	674.125	4	69.62			x
P02666	Beta-casein	181	204	L.SQSKVLPVPQKAVPYPQRDMPIQA.F		24	2676.44	670.121	4	68.02	42.22	893.159	3	83.96		x	x	x
P02666	Beta-casein	181	205	L.SQSKVLPVPQKAVPYPQRDM(+15.99)PIQAF.L	Oxidation (M)	25	2839.51	710.886	4	55.02	44.55	947.512	3	60.56		x		x
P02666	Beta-casein	181	205	L.SQSKVLPVPQKAVPYPQRDMPIQAF.L		25	2823.51	706.886	4	70.66	48.56	942.185	3	84.37	x	x	x	x
P02666	Beta-casein	181	206	L.SQSKVLPVPQKAVPYPQRDM(+15.99)PIQAFL.L	Oxidation (M)	26	2952.59	739.159	4	47.3	50.11	985.206	3	67.03			x
P02666	Beta-casein	181	206	L.SQSKVLPVPQKAVPYPQRDMPIQAFL.L		26	2936.59	735.159	4	64.77	54.47	979.876	3	82.49			x	x
P02666	Beta-casein	181	207	L.SQSKVLPVPQKAVPYPQRDMPIQAFLL.Y		27	3049.68	763.43	4	52.68	58.62	763.428	4	52.72		x
P02666	Beta-casein	182	190	S.QSKVLPVPQ.K		9	994.581	498.297	2	26.15	30.27	498.304	2	50.58	x	x	x
P02666	Beta-casein	183	190	Q.SKVLPVPQ.K		8	866.523	434.269	2	23.04	29.38	434.273	2	40.38			x
P02666	Beta-casein	183	191	Q.SKVLPVPQK.A		9	994.617	498.317	2	37.07	23.34	498.317	2	50.99		x	x	x
P02666	Beta-casein	183	197	Q.SKVLPVPQKAVPYPQ.R		15	1649.95	550.991	3	57.49	36.98	550.992	3	80.11	x	x	x
P02666	Beta-casein	183	205	Q.SKVLPVPQKAVPYPQRDMPIQAF.L		23	2608.42	653.116	4	72.61	47.74	653.122	4	59.12		x		x
P02666	Beta-casein	184	197	S.KVLPVPQKAVPYPQ.R		14	1562.92	521.981	3	64.39	35.88	521.981	3	79.33	x	x	x	x
P02666	Beta-casein	184	204	S.KVLPVPQKAVPYPQRDMPIQA.F		21	2374.32	594.589	4	76.48	41.47	792.45	3	63.7			x
P02666	Beta-casein	185	197	K.VLPVPQKAVPYPQ.R		13	1434.82	718.421	2	26.52	40.04	718.424	2	82.69	x	x	x	x
P02666	Beta-casein	185	201	K.VLPVPQKAVPYPQRDMP.I		17	1934.04	645.691	3	71.99	41.66	645.691	3	57.1			x
P02666	Beta-casein	185	204	K.VLPVPQKAVPYPQRDM(+15.99)PIQA.F	Oxidation (M)	20	2262.22	755.084	3	48.08	40.86	755.085	3	53.1		x	x
P02666	Beta-casein	185	204	K.VLPVPQKAVPYPQRDMPIQA.F		20	2246.22	749.752	3	55.5	45.02	749.755	3	66.3	x	x	x	x
P02666	Beta-casein	185	205	K.VLPVPQKAVPYPQRDM(+15.99)PIQAF.L	Oxidation (M)	21	2409.29	804.107	3	29.28	47.43	804.107	3	74.94	x	x		x
P02666	Beta-casein	185	205	K.VLPVPQKAVPYPQRDMPIQAF.L		21	2393.29	599.332	4	69.79	51.79	798.777	3	75.89	x	x	x	x
P02666	Beta-casein	186	197	V.LPVPQKAVPYPQ.R		12	1335.76	668.887	2	28.16	37.55	668.885	2	80.12	x	x	x
P02666	Beta-casein	186	205	V.LPVPQKAVPYPQRDMPIQAF.L		20	2294.22	765.751	3	36.46	50.23	765.75	3	68.04	x
P02666	Beta-casein	190	206	P.QKAVPYPQRDMPIQAFL.L		17	2001.05	668.027	3	53.49	53.03	668.028	3	37.05			x	x
P02666	Beta-casein	191	201	Q.KAVPYPQRDM(+15.99)P.I	Oxidation (M)	11	1316.65	439.893	3	49.4	23.06	439.901	3	44.64		x	x	x
P02666	Beta-casein	191	201	Q.KAVPYPQRDMP.I		11	1300.66	434.562	3	50.84	28.53	434.57	3	64.44		x	x	x
P02666	Beta-casein	191	203	Q.KAVPYPQRDM(+15.99)PIQ.A	Oxidation (M)	13	1557.8	520.274	3	49.82	26.68	520.279	3	55.22		x	x	x
P02666	Beta-casein	191	203	Q.KAVPYPQRDMPIQ.A		13	1541.8	514.942	3	59.1	32.7	514.952	3	69.79			x
P02666	Beta-casein	191	204	Q.KAVPYPQRDM(+15.99)PIQA.F	Oxidation (M)	14	1628.83	543.954	3	49.09	28.83	815.437	2	63.69		x	x	x
P02666	Beta-casein	191	204	Q.KAVPYPQRDMPIQA.F		14	1612.84	538.622	3	69.66	34.48	807.439	2	71.2	x	x	x	x
P02666	Beta-casein	191	205	Q.KAVPYPQRDM(+15.99)PIQAF.L	Oxidation (M)	15	1775.9	592.977	3	62.58	37.67	592.982	3	50.77	x	x	x	x
P02666	Beta-casein	191	205	Q.KAVPYPQRDMPIQAF.L		15	1759.91	587.644	3	77.46	43.93	587.653	3	63.54	x	x	x	x
P02666	Beta-casein	191	206	Q.KAVPYPQRDM(+15.99)PIQAFL.L	Oxidation (M)	16	1888.99	630.673	3	47.11	46.57	945.507	2	71.62			x	x
P02666	Beta-casein	191	206	Q.KAVPYPQRDMPIQAFL.L		16	1872.99	625.341	3	62.92	52.68	937.51	2	86.22	x		x	x
P02666	Beta-casein	192	203	K.AVPYPQRDM(+15.99)PIQ.A	Oxidation (M)	12	1429.7	715.86	2	31.2	30.8	715.865	2	63.2			x
P02666	Beta-casein	192	203	K.AVPYPQRDMPIQ.A		12	1413.71	707.862	2	32.76	37.59	707.865	2	70.16	x	x	x	x
P02666	Beta-casein	192	204	K.AVPYPQRDM(+15.99)PIQA.F	Oxidation (M)	13	1500.74	501.255	3	54.09	33.16	751.39	2	73.72			x	x
P02666	Beta-casein	192	204	K.AVPYPQRDMPIQA.F		13	1484.74	495.923	3	69.16	39.38	743.393	2	79.08	x	x	x	x
P02666	Beta-casein	192	205	K.AVPYPQRDM(+15.99)PIQAF.L	Oxidation (M)	14	1647.81	550.277	3	57.61	42.87	824.917	2	86.8	x	x	x	x
P02666	Beta-casein	192	205	K.AVPYPQRDMPIQAF.L		14	1631.81	544.946	3	58.66	49.32	816.921	2	92.41	x	x	x	x
P02666	Beta-casein	192	206	K.AVPYPQRDM(+15.99)PIQAFL.L	Oxidation (M)	15	1760.89	881.457	2	24.01	52.03	881.46	2	83.62			x
P02666	Beta-casein	192	206	K.AVPYPQRDMPIQAFL.L		15	1744.9	582.642	3	43.74	58.48	873.462	2	87.54		x	x	x
P02666	Beta-casein	192	207	K.AVPYPQRDMPIQAFLL.Y		16	1857.98	620.336	3	53.08	64.41	930.001	2	90.72		x
P02666	Beta-casein	193	201	A.VPYPQRDM(+15.99)P.I	Oxidation (M)	9	1117.52	559.77	2	30.67	25.07	559.774	2	46.27			x
P02666	Beta-casein	193	201	A.VPYPQRDMP.I		9	1101.53	551.772	2	27.49	31.79	551.778	2	59.65	x		x
P02666	Beta-casein	193	203	A.VPYPQRDM(+15.99)PIQ.A	Oxidation (M)	11	1358.67	680.341	2	31.7	28.96	680.334	2	39.6			x
P02666	Beta-casein	193	203	A.VPYPQRDMPIQ.A		11	1342.67	672.344	2	34.19	35.93	672.349	2	63.81			x
P02666	Beta-casein	193	204	A.VPYPQRDM(+15.99)PIQA.F	Oxidation (M)	12	1429.7	477.575	3	58.57	31.85	715.867	2	64.97	x	x	x
P02666	Beta-casein	193	204	A.VPYPQRDMPIQA.F		12	1413.71	707.863	2	43.77	38.06	707.871	2	79.09	x	x	x	x
P02666	Beta-casein	193	205	A.VPYPQRDMPIQAF.L		13	1560.78	781.398	2	29.54	48.23	781.413	2	83.79	x	x	x	x
P02666	Beta-casein	193	206	A.VPYPQRDMPIQAFL.L		14	1673.86	837.942	2	29.83	57.94	837.936	2	84.7			x
P02666	Beta-casein	194	204	V.PYPQRDMPIQA.F		11	1314.64	439.222	3	26.6	39.53	658.335	2	60.34			x
P02666	Beta-casein	195	203	P.YPQRDMPIQ.A		9	1146.55	574.283	2	33.88	29.34	574.284	2	46.92			x
P02666	Beta-casein	195	204	P.YPQRDM(+15.99)PIQA.F	Oxidation (M)	10	1233.58	617.799	2	22.78	26.11	617.803	2	58.47			x
P02666	Beta-casein	195	204	P.YPQRDMPIQA.F		10	1217.59	609.802	2	35.13	32.64	609.81	2	59.54	x	x	x
P02666	Beta-casein	195	206	P.YPQRDMPIQAFL.L		12	1477.74	739.88	2	34.89	55.9	739.887	2	59.65			x
P02666	Beta-casein	197	206	P.QRDMPIQAFL.L		10	1217.62	609.821	2	22.38	53.29	609.815	2	43.57			x
P02666	Beta-casein	204	224	Q.AFLLYQEPVLGPVRGPFPIIV		21	2324.33	775.788	3	74.49	75.22	1163.18	2	81.2			x	x
P02666	Beta-casein	205	224	A.FLLYQEPVLGPVRGPFPIIV		20	2253.29	752.109	3	68.21	74.4	1127.66	2	79.88	x	x	x	x
P02666	Beta-casein	206	221	F.LLYQEPVLGPVRGPFP.I		16	1780.99	594.671	3	64.07	57.91	891.512	2	82.73		x	x	x
P02666	Beta-casein	206	222	F.LLYQEPVLGPVRGPFPI.I		17	1894.07	632.366	3	47.83	63.8	948.048	2	93.28		x	x	x
P02666	Beta-casein	206	223	F.LLYQEPVLGPVRGPFPII.V		18	2007.16	670.062	3	69.21	67.8	1004.59	2	98.87	x	x	x	x
P02666	Beta-casein	206	224	F.LLYQEPVLGPVRGPFPIIV		19	2106.22	703.085	3	62.09	69.11	1054.13	2	96.33	x	x	x	x
P02666	Beta-casein	207	221	L.LYQEPVLGPVRGPFP.I		15	1667.9	556.977	3	49.37	53.08	834.975	2	91.01	x	x	x	x
P02666	Beta-casein	207	222	L.LYQEPVLGPVRGPFPI.I		16	1780.99	594.673	3	56.86	59.72	891.51	2	87.11			x	x
P02666	Beta-casein	207	224	L.LYQEPVLGPVRGPFPIIV		18	1993.14	665.39	3	76.36	64.92	997.587	2	102.61	x	x	x	x
P02666	Beta-casein	208	222	L.YQEPVLGPVRGPFPI.I		15	1667.9	556.977	3	59.31	57.72	834.959	2	77.34		x	x
P02666	Beta-casein	208	223	L.YQEPVLGPVRGPFPII.V		16	1780.99	594.671	3	60.39	62.92	891.504	2	93.94	x	x	x	x
P02666	Beta-casein	208	224	L.YQEPVLGPVRGPFPIIV		17	1880.06	627.695	3	70	64.83	941.049	2	98.19	x	x	x	x
P02666	Beta-casein	209	224	Y.QEPVLGPVRGPFPIIV		16	1716.99	573.339	3	46.84	63.23	859.516	2	93.44	x	x	x
P02666	Beta-casein	210	217	Q.EPVLGPVR.G		8	865.502	433.759	2	22.9	29.63	433.761	2	51.11	x	x		x
P02666	Beta-casein	210	221	Q.EPVLGPVRGPFP.I		12	1263.7	632.858	2	26.82	49.02	632.863	2	63.46	x	x	x	x
P02666	Beta-casein	210	222	Q.EPVLGPVRGPFPI.I		13	1376.78	689.4	2	32.39	56.27	689.4	2	70.08	x	x		x
P02666	Beta-casein	210	224	Q.EPVLGPVRGPFPIIV		15	1588.93	795.477	2	25.96	63.62	795.485	2	94.81	x	x	x	x
P02666	Beta-casein	211	221	E.PVLGPVRGPFP.I		11	1134.65	568.337	2	22.53	47.27	568.338	2	57.38			x	x
P02666	Beta-casein	211	224	E.PVLGPVRGPFPIIV		14	1459.89	730.956	2	39.51	63.17	730.959	2	82.1		x	x	x
P02666	Beta-casein	212	221	P.VLGPVRGPFP.I		10	1037.6	519.81	2	23.73	43.76	519.812	2	61.49			x
P02666	Beta-casein	212	224	P.VLGPVRGPFPIIV		13	1362.84	682.429	2	23.49	60.41	682.428	2	58.03		x	x
P02666	Beta-casein	213	224	V.LGPVRGPFPIIV		12	1263.77	632.894	2	24.55	59.28	632.896	2	59.33		x	x
P02666	Beta-casein	214	221	L.GPVRGPFP.I		8	825.45	413.734	2	25.39	33.35	413.737	2	60.34	x	x	x	x
P02666	Beta-casein	214	223	L.GPVRGPFPII.V		10	1051.62	526.817	2	36.44	51.59	526.817	2	37.75		x
P02666	Beta-casein	214	224	L.GPVRGPFPIIV		11	1150.69	576.352	2	25.24	54.41	576.359	2	53.33	x	x	x	x
P02666	Beta-casein	215	224	G.PVRGPFPIIV		10	1093.66	547.841	2	33.37	54.59	547.843	2	51.45	x	x	x	x
P02754	Beta-lactoglobulin	17	24	A.LIVTQTM(+15.99)K.G	Oxidation (M)	8	948.531	475.272	2	37.19	21.99	475.279	2	44.24	x	x	x	x
P02754	Beta-lactoglobulin	17	24	A.LIVTQTMK.G		8	932.537	467.275	2	49.99	29.33	467.278	2	53.87	x	x	x	x
P02754	Beta-lactoglobulin	17	25	A.LIVTQTM(+15.99)KG.L	Oxidation (M)	9	1005.55	503.785	2	23.48	22.2	503.788	2	35.15				x
P02754	Beta-lactoglobulin	17	25	A.LIVTQTMKG.L		9	989.558	495.788	2	46.63	30.01	495.787	2	59.08	x	x	x	x
P02754	Beta-lactoglobulin	17	26	A.LIVTQTM(+15.99)KGL.D	Oxidation (M)	10	1118.64	560.327	2	31.55	34.08	560.335	2	61.1	x	x	x	x
P02754	Beta-lactoglobulin	17	26	A.LIVTQTMKGL.D		10	1102.64	552.33	2	31.36	43.62	552.329	2	70	x	x	x	x
P02754	Beta-lactoglobulin	17	27	A.LIVTQTM(+15.99)KGLD.I	Oxidation (M)	11	1233.66	617.841	2	35.74	32.01	617.838	2	64.76	x	x	x	x
P02754	Beta-lactoglobulin	17	27	A.LIVTQTMKGLD.I		11	1217.67	609.846	2	35.18	41.08	609.844	2	75.09	x	x	x	x
P02754	Beta-lactoglobulin	17	29	A.LIVTQTM(+15.99)KGLDIQ.K	Oxidation (M)	13	1474.81	492.61	3	67.88	40.98	738.42	2	83.98	x	x	x	x
P02754	Beta-lactoglobulin	17	29	A.LIVTQTMKGLDIQ.K		13	1458.81	487.279	3	58.36	48.83	730.421	2	93.76	x	x	x	x
P02754	Beta-lactoglobulin	17	30	A.LIVTQTM(+15.99)KGLDIQK.V	Oxidation (M)	14	1602.9	535.31	3	78.49	35.48	535.311	3	50.5	x	x	x	x
P02754	Beta-lactoglobulin	17	30	A.LIVTQTMKGLDIQK.V		14	1586.91	529.979	3	88.39	42.52	794.464	2	85.53	x	x	x	x
P02754	Beta-lactoglobulin	17	33	A.LIVTQTMKGLDIQKVAG.T		17	1814.03	605.688	3	70.17	47.31	605.687	3	61.12	x		x	x
P02754	Beta-lactoglobulin	18	26	L.IVTQTM(+15.99)KGL.D	Oxidation (M)	9	1005.55	503.783	2	31.78	24.26	503.784	2	51.99	x	x	x	x
P02754	Beta-lactoglobulin	18	26	L.IVTQTMKGL.D		9	989.558	495.787	2	45.27	33.6	495.788	2	61.11	x	x	x	x
P02754	Beta-lactoglobulin	18	27	L.IVTQTMKGLD.I		10	1104.58	553.302	2	38.79	31.57	553.299	2	62.12			x	x
P02754	Beta-lactoglobulin	18	29	L.IVTQTM(+15.99)KGLDIQ.K	Oxidation (M)	12	1361.72	681.87	2	38.48	32.3	681.872	2	83.69		x	x
P02754	Beta-lactoglobulin	18	29	L.IVTQTMKGLDIQ.K		12	1345.73	673.874	2	41.84	39.97	673.878	2	82.08	x	x	x	x
P02754	Beta-lactoglobulin	18	30	L.IVTQTM(+15.99)KGLDIQK.V	Oxidation (M)	13	1489.82	497.613	3	81.53	27.71	497.615	3	45.47		x	x
P02754	Beta-lactoglobulin	18	30	L.IVTQTMKGLDIQK.V		13	1473.82	492.283	3	90.25	34.54	492.279	3	73.28	x	x	x	x
P02754	Beta-lactoglobulin	19	29	I.VTQTM(+15.99)KGLDIQ.K	Oxidation (M)	11	1248.64	625.328	2	31.81	27.38	625.329	2	66.92		x	x
P02754	Beta-lactoglobulin	19	29	I.VTQTMKGLDIQ.K		11	1232.64	617.331	2	46.73	34.63	617.328	2	72.21	x	x	x	x
P02754	Beta-lactoglobulin	19	30	I.VTQTMKGLDIQK.V		12	1360.74	454.587	3	74.07	29.34	681.379	2	67.8	x		x	x
P02754	Beta-lactoglobulin	20	30	V.TQTMKGLDIQK.V		11	1261.67	421.565	3	83.28	27.9	421.562	3	63.74	x		x
P02754	Beta-lactoglobulin	21	29	T.QTMKGLDIQ.K		9	1032.53	517.271	2	37.44	32.34	517.27	2	29.11		x
P02754	Beta-lactoglobulin	23	30	T.MKGLDIQK.V		8	931.516	466.766	2	42.45	25.13	466.767	2	48.01			x
P02754	Beta-lactoglobulin	23	33	T.MKGLDIQKVAG.T		11	1158.64	580.331	2	29.88	33.93	580.332	2	56.33			x
P02754	Beta-lactoglobulin	25	32	K.GLDIQKVA.G		8	842.486	422.252	2	38.91	33.42	422.252	2	42.02	x	x	x
P02754	Beta-lactoglobulin	25	33	K.GLDIQKVAG.T		9	899.508	450.762	2	43.63	33.28	450.762	2	45		x	x
P02754	Beta-lactoglobulin	27	38	L.DIQKVAGTWYSL.A		12	1379.71	690.863	2	37.11	53.02	690.868	2	82.57	x	x	x	x
P02754	Beta-lactoglobulin	28	38	D.IQKVAGTWYSL.A		11	1264.68	633.351	2	28.37	46.73	633.347	2	65.34		x		x
P02754	Beta-lactoglobulin	30	38	Q.KVAGTWYSL.A		9	1023.54	512.779	2	27.45	44.32	512.787	2	60.05	x	x		x
P02754	Beta-lactoglobulin	39	56	L.AMAASDISLLDAQSAPLR.V		18	1828.94	610.654	3	105.17	50.28	915.481	2	89.05			x	x
P02754	Beta-lactoglobulin	39	58	L.AM(+15.99)AASDISLLDAQSAPLRVY.V	Oxidation (M)	20	2107.06	703.364	3	83.64	55.25	1054.54	2	95.36		x
P02754	Beta-lactoglobulin	39	58	L.AMAASDISLLDAQSAPLRVY.V		20	2091.07	698.032	3	109.55	57.72	1046.54	2	100.72		x		x
P02754	Beta-lactoglobulin	39	60	L.AMAASDISLLDAQSAPLRVYVE.E		22	2319.18	774.069	3	23.26	60.32	774.065	3	71.85		x
P02754	Beta-lactoglobulin	47	56	S.LLDAQSAPLR.V		10	1082.61	542.313	2	26.66	32.82	542.317	2	65.72			x	x
P02754	Beta-lactoglobulin	48	56	L.LDAQSAPLR.V		9	969.524	485.77	2	29.26	25.59	485.773	2	61.83		x
P02754	Beta-lactoglobulin	49	58	L.DAQSAPLRVY.V		10	1118.57	560.294	2	34	34.44	560.295	2	61.01	x	x		x
P02754	Beta-lactoglobulin	59	67	Y.VEELKPTPE.G		9	1040.54	521.278	2	41.45	24.53	521.279	2	53.9	x		x	x
P02754	Beta-lactoglobulin	59	71	Y.VEELKPTPEGDLE.I		13	1454.71	728.365	2	30.33	34.09	728.372	2	76.68	x		x
P02754	Beta-lactoglobulin	60	71	V.EELKPTPEGDLE.I		12	1355.65	678.832	2	30.29	31.64	678.838	2	71.97	x		x
P02754	Beta-lactoglobulin	61	71	E.ELKPTPEGDLE.I		11	1226.6	614.309	2	29.46	30.23	614.313	2	69.47	x		x
P02754	Beta-lactoglobulin	86	96	K.KIIAEKTKIPA.V		11	1210.76	404.597	3	50.02	23.77	404.598	3	48.53			x	x
P02754	Beta-lactoglobulin	87	96	K.IIAEKTKIPA.V		10	1082.67	542.343	2	30.12	26.3	542.347	2	54.12		x	x
P02754	Beta-lactoglobulin	99	109	F.KIDALNENKVL.V		11	1255.71	419.579	3	73.68	34.8	628.868	2	69.45		x		x
P02754	Beta-lactoglobulin	100	107	K.IDALNENK.V		8	915.466	458.741	2	27.82	20.24	458.743	2	40.43		x		x
P02754	Beta-lactoglobulin	112	118	L.DTDYKKY.L		7	931.429	466.723	2	39.58	16.38	466.723	2	40.76	x		x
P02754	Beta-lactoglobulin	112	119	L.DTDYKKYL.L		8	1044.51	523.264	2	44.91	34.81	523.267	2	51	x
P02754	Beta-lactoglobulin	138	147	C.LVRTPEVDDE.A		10	1171.57	586.794	2	39.98	28.01	586.8	2	65.32	x
P02754	Beta-lactoglobulin	139	147	L.VRTPEVDDE.A		9	1058.49	530.252	2	33.64	23.77	530.262	2	64.95	x	x	x
P02754	Beta-lactoglobulin	146	160	D.DEALEKFDKALKALP.M		15	1686.92	563.316	3	74.21	53.82	563.314	3	64.94			x	x
P02754	Beta-lactoglobulin	146	162	D.DEALEKFDKALKALPMH.I		17	1955.02	489.764	4	111.61	51.83	489.769	4	55.96			x	x
P02754	Beta-lactoglobulin	146	165	D.DEALEKFDKALKALPMHIRL.S		20	2337.29	468.467	5	83.42	60.91	585.334	4	64.86			x	x
P02754	Beta-lactoglobulin	147	162	D.EALEKFDKALKALPMH.I		16	1839.99	461.006	4	97.93	45.96	461.008	4	43.03			x	x
P18892	Butyrophilin subfamily 1 member A1	76	92	F.VSREGQEQEGEEM(+15.99)AEYR.G	Oxidation (M)	17	2041.86	681.632	3	111.1	21.88	681.632	3	77.46	x	x		x
P18892	Butyrophilin subfamily 1 member A1	76	92	F.VSREGQEQEGEEMAEYR.G		17	2025.87	676.3	3	130	28.01	676.299	3	82.27	x	x	x	x
P18892	Butyrophilin subfamily 1 member A1	93	110	R.GRVSLVEDHIAEGSVAVR.I		18	1893.01	632.01	3	125.97	36.88	632.012	3	46.34	x	x	x	x
P18892	Butyrophilin subfamily 1 member A1	98	110	L.VEDHIAEGSVAVR.I		13	1380.7	461.241	3	99.96	27.59	461.241	3	67.98	x	x	x	x
P18892	Butyrophilin subfamily 1 member A1	179	203	R.THRGEEFPSM(+15.99)SESRNPDEEGLFTVR.A	Oxidation (M)	25	2922.32	731.59	4	84.48	38.63	731.59	4	80.73	x	x	x
P18892	Butyrophilin subfamily 1 member A1	179	203	R.THRGEEFPSMSESRNPDEEGLFTVR.A		25	2906.33	727.592	4	104.9	42.59	727.594	4	91.3	x	x	x	x
P18892	Butyrophilin subfamily 1 member A1	190	203	S.ESRNPDEEGLFTVR.A		14	1647.79	550.269	3	88.87	37.54	550.272	3	62.12	x
Q9MZ06	Fibroblast growth factor-binding protein 1	29	51	R.NRRGSKASADESLALGKPGKEPR.S		23	2423.3	485.667	5	98.35	22.54	485.667	5	37.4	x	x
Q9MZ06	Fibroblast growth factor-binding protein 1	31	51	R.RGSKASADESLALGKPGKEPR.S		21	2153.16	539.297	4	140.78	23.38	431.644	5	91.35	x	x		x
Q9MZ06	Fibroblast growth factor-binding protein 1	32	51	R.GSKASADESLALGKPGKEPR.S		20	1997.05	500.271	4	128.39	24.97	500.275	4	91.45	x	x	x	x
Q9MZ06	Fibroblast growth factor-binding protein 1	35	51	K.ASADESLALGKPGKEPR.S		17	1724.91	432.235	4	85.55	26.88	432.235	4	65.74	x	x	x	x
Q3MHZ5	FXYD domain-containing ion transport regulator 6	19	31	A.SATEQEKEKDPFH.Y		13	1544.71	515.911	3	47.53	21.98	515.908	3	35.5		x
P80195	Glycosylation-dependent cell adhesion molecule 1	19	26	A.ILNKPEDE.T		8	956.481	479.248	2	32.44	19.79	479.253	2	51.23		x	x	x
P80195	Glycosylation-dependent cell adhesion molecule 1	19	27	A.ILNKPEDET.H		9	1057.53	529.772	2	39.33	21.35	529.772	2	42.85	x	x	x	x
P80195	Glycosylation-dependent cell adhesion molecule 1	19	29	A.ILNKPEDETHL.E		11	1307.67	436.898	3	73.74	29.18	654.846	2	56.44	x	x	x	x
P80195	Glycosylation-dependent cell adhesion molecule 1	19	30	A.ILNKPEDETHLE.A		12	1436.71	479.914	3	66.02	27.88	719.373	2	73.68	x	x	x	x
P80195	Glycosylation-dependent cell adhesion molecule 1	19	31	A.ILNKPEDETHLEA.Q		13	1507.75	503.592	3	83.43	29.93	503.593	3	37.13			x	x
P80195	Glycosylation-dependent cell adhesion molecule 1	19	32	A.ILNKPEDETHLEAQ.P		14	1635.81	546.28	3	91.48	28.22	546.281	3	65.34			x	x
P80195	Glycosylation-dependent cell adhesion molecule 1	19	34	A.ILNKPEDETHLEAQPT.D		16	1833.91	612.313	3	85.05	30.12	917.971	2	76.94	x	x	x	x
P80195	Glycosylation-dependent cell adhesion molecule 1	19	35	A.ILNKPEDETHLEAQPTD.A		17	1948.94	650.654	3	88.07	30.54	650.661	3	52.21	x	x	x	x
P80195	Glycosylation-dependent cell adhesion molecule 1	19	36	A.ILNKPEDETHLEAQPTDA.S		18	2019.97	674.335	3	66.23	31.44	674.338	3	48.99	x	x	x	x
P80195	Glycosylation-dependent cell adhesion molecule 1	19	38	A.ILNKPEDETHLEAQPTDASA.Q		20	2178.04	727.026	3	48.88	31.65	1090.03	2	63.95	x	x	x	x
P80195	Glycosylation-dependent cell adhesion molecule 1	19	39	A.ILNKPEDETHLEAQPTDASAQ.F		21	2306.1	769.711	3	38.23	31.17	1154.06	2	75.06	x	x	x	x
P80195	Glycosylation-dependent cell adhesion molecule 1	19	40	A.ILNKPEDETHLEAQPTDASAQF.I		22	2453.17	818.734	3	32.71	39.76	1227.61	2	90.94	x	x	x	x
P80195	Glycosylation-dependent cell adhesion molecule 1	19	41	A.ILNKPEDETHLEAQPTDASAQFI.R		23	2566.26	856.432	3	23	43.96	856.429	3	58.57	x	x		x
P80195	Glycosylation-dependent cell adhesion molecule 1	19	42	A.ILNKPEDETHLEAQPTDASAQFIR.N		24	2722.36	681.598	4	124.25	40.06	908.463	3	92.06	x	x	x	x
P80195	Glycosylation-dependent cell adhesion molecule 1	19	43	A.ILNKPEDETHLEAQPTDASAQFIRN.L		25	2836.4	710.108	4	108.46	39.3	946.475	3	86.7	x	x	x	x
P80195	Glycosylation-dependent cell adhesion molecule 1	19	44	A.ILNKPEDETHLEAQPTDASAQFIRNL.Q		26	2949.48	738.382	4	95.95	50.01	984.175	3	98.18	x	x	x	x
P80195	Glycosylation-dependent cell adhesion molecule 1	19	71	A.ILNKPEDETHLEAQPT(+79.97)DASAQFIRNLQISNEDLSKEPSISREDLIS(+79.97)KEQIVIR.S	Phosphorylation (STY)	53	6217.06	778.143	8	25.4	58.64	1244.42	5	43.83	x		x	x
P80195	Glycosylation-dependent cell adhesion molecule 1	20	29	I.LNKPEDETHL.E		10	1194.59	598.301	2	25.86	25.02	598.31	2	57.88	x	x		x
P80195	Glycosylation-dependent cell adhesion molecule 1	20	30	I.LNKPEDETHLE.A		11	1323.63	442.217	3	69.89	24.34	662.83	2	69.68	x	x	x	x
P80195	Glycosylation-dependent cell adhesion molecule 1	20	34	I.LNKPEDETHLEAQPT.D		15	1720.83	574.616	3	91.47	27.02	574.62	3	36.18	x	x	x
P80195	Glycosylation-dependent cell adhesion molecule 1	20	35	I.LNKPEDETHLEAQPTD.A		16	1835.85	612.959	3	40.21	27.38	612.963	3	32.16	x		x	x
P80195	Glycosylation-dependent cell adhesion molecule 1	20	39	I.LNKPEDETHLEAQPTDASAQ.F		20	2193.02	732.017	3	36.91	28.08	732.019	3	50.13				x
P80195	Glycosylation-dependent cell adhesion molecule 1	20	40	I.LNKPEDETHLEAQPTDASAQF.I		21	2340.09	781.039	3	44.01	36.93	1171.06	2	78.83	x	x	x	x
P80195	Glycosylation-dependent cell adhesion molecule 1	20	42	I.LNKPEDETHLEAQPTDASAQFIR.N		23	2609.27	653.327	4	52.92	38.23	653.332	4	68.59	x	x
P80195	Glycosylation-dependent cell adhesion molecule 1	20	44	I.LNKPEDETHLEAQPTDASAQFIRNL.Q		25	2836.4	710.109	4	103.49	48.88	710.114	4	59.72	x	x
P80195	Glycosylation-dependent cell adhesion molecule 1	21	30	L.NKPEDETHLE.A		10	1210.55	404.524	3	58.49	19.12	606.289	2	59.93	x	x	x	x
P80195	Glycosylation-dependent cell adhesion molecule 1	21	40	L.NKPEDETHLEAQPTDASAQF.I		20	2227	743.344	3	36.49	35.29	743.351	3	58.67		x	x	x
P80195	Glycosylation-dependent cell adhesion molecule 1	22	40	N.KPEDETHLEAQPTDASAQF.I		19	2112.96	705.331	3	42.31	34.81	705.334	3	65.11		x		x
P80195	Glycosylation-dependent cell adhesion molecule 1	26	40	D.ETHLEAQPTDASAQF.I		15	1643.74	822.881	2	25.28	35.54	822.883	2	82.08		x		x
P80195	Glycosylation-dependent cell adhesion molecule 1	30	40	L.EAQPTDASAQF.I		11	1163.51	582.764	2	32.91	31.65	582.766	2	65.27	x	x	x	x
P80195	Glycosylation-dependent cell adhesion molecule 1	31	40	E.AQPTDASAQF.I		10	1034.47	518.241	2	35.82	30.27	518.245	2	62.84	x	x	x	x
P80195	Glycosylation-dependent cell adhesion molecule 1	41	48	F.IRNLQIS(+79.97)N.E	Phosphorylation (STY)	8	1036.51	519.262	2	30.78	28.54	519.264	2	35.24				x
P80195	Glycosylation-dependent cell adhesion molecule 1	41	71	F.IRNLQIS(+79.97)NEDLSKEPS(+79.97)ISREDLIS(+79.97)KEQIVIR.S	Phosphorylation (STY)	31	3861.87	773.386	5	66.41	51.22	966.477	4	66.07	x	x		x
P80195	Glycosylation-dependent cell adhesion molecule 1	41	71	F.IRNLQIS(+79.97)NEDLSKEPSIS(+79.97)REDLIS(+79.97)KEQIVIR.S	Phosphorylation (STY)	31	3861.87	773.385	5	70.65	51.33	966.477	4	72.82	x	x	x	x
P80195	Glycosylation-dependent cell adhesion molecule 1	41	71	F.IRNLQISNEDLS(+79.97)KEPSISREDLIS(+79.97)KEQIVIR.S	Phosphorylation (STY)	31	3781.9	757.389	5	66.99	50.21	757.388	5	65.7	x		x	x
P80195	Glycosylation-dependent cell adhesion molecule 1	41	71	F.IRNLQISNEDLS(+79.97)KEPSISREDLISKEQIVIR.S	Phosphorylation (STY)	31	3701.94	741.398	5	82.33	48.3	741.398	5	77.17	x		x	x
P80195	Glycosylation-dependent cell adhesion molecule 1	41	71	F.IRNLQISNEDLSKEPS(+79.97)IS(+79.97)REDLISKEQIVIR.S	Phosphorylation (STY)	31	3781.9	757.39	5	60.57	49.98	757.39	5	53.45	x		x
P80195	Glycosylation-dependent cell adhesion molecule 1	41	71	F.IRNLQISNEDLSKEPS(+79.97)ISREDLIS(+79.97)KEQIVIR.S	Phosphorylation (STY)	31	3781.9	946.49	4	52.25	49.72	946.484	4	73.49	x		x	x
P80195	Glycosylation-dependent cell adhesion molecule 1	41	71	F.IRNLQISNEDLSKEPSISREDLISKEQIVIR.S		31	3621.97	725.405	5	94.06	47.16	725.403	5	73.52	x	x	x	x
P80195	Glycosylation-dependent cell adhesion molecule 1	44	71	N.LQISNEDLSKEPSISREDLISKEQIVIR.S		28	3238.74	648.758	5	98.63	48.21	648.759	5	28.92			x	x
P80195	Glycosylation-dependent cell adhesion molecule 1	45	71	L.QISNEDLSKEPSISREDLISKEQIVIR.S		27	3125.66	626.141	5	88.73	45.41	626.149	5	42.61		x
P80195	Glycosylation-dependent cell adhesion molecule 1	59	71	S.REDLIS(+79.97)KEQIVIR.S	Phosphorylation (STY)	13	1677.88	560.303	3	89.02	39.49	560.303	3	59.97			x	x
P80195	Glycosylation-dependent cell adhesion molecule 1	61	71	E.DLIS(+79.97)KEQIVIR.S	Phosphorylation (STY)	11	1392.74	465.253	3	70.51	45.16	697.38	2	57.73	x	x
P80195	Glycosylation-dependent cell adhesion molecule 1	62	71	D.LIS(+79.97)KEQIVIR.S	Phosphorylation (STY)	10	1277.71	426.912	3	69.77	38.99	639.865	2	54.53			x	x
P80195	Glycosylation-dependent cell adhesion molecule 1	72	84	R.SSRQPQSQNPKLP.L		13	1465.76	489.596	3	64.97	23.6	489.596	3	67.11	x	x	x	x
P80195	Glycosylation-dependent cell adhesion molecule 1	72	85	R.SSRQPQSQNPKLPL.S		14	1578.85	527.29	3	72.8	31.24	527.293	3	77.41	x	x	x	x
P80195	Glycosylation-dependent cell adhesion molecule 1	72	86	R.SSRQPQSQNPKLPLS.I		15	1665.88	556.302	3	70.18	29.48	556.307	3	74.5	x	x	x	x
P80195	Glycosylation-dependent cell adhesion molecule 1	72	87	R.SSRQPQSQNPKLPLSI.L		16	1778.96	593.997	3	65.95	41.16	593.994	3	52.63		x
P80195	Glycosylation-dependent cell adhesion molecule 1	72	88	R.SSRQPQSQNPKLPLSIL.K		17	1892.05	631.694	3	81.58	47.77	631.702	3	81.7	x	x	x	x
P80195	Glycosylation-dependent cell adhesion molecule 1	72	89	R.SSRQPQSQNPKLPLSILK.E		18	2020.14	506.043	4	85.18	40.94	506.046	4	89.73	x	x	x	x
P80195	Glycosylation-dependent cell adhesion molecule 1	72	90	R.SSRQPQSQNPKLPLSILKE.K		19	2149.19	538.304	4	85.67	42.14	538.305	4	102.54	x	x	x	x
P80195	Glycosylation-dependent cell adhesion molecule 1	72	91	R.SSRQPQSQNPKLPLSILKEK.H		20	2277.28	570.327	4	85.38	37.89	570.337	4	99.43	x	x	x	x
P80195	Glycosylation-dependent cell adhesion molecule 1	72	93	R.SSRQPQSQNPKLPLSILKEKHL.R		22	2527.42	506.494	5	99.49	39.48	632.872	4	95.57	x	x		x
P80195	Glycosylation-dependent cell adhesion molecule 1	73	86	S.SRQPQSQNPKLPLS.I		14	1578.85	527.291	3	52.44	28.89	527.287	3	68.54	x	x	x	x
P80195	Glycosylation-dependent cell adhesion molecule 1	73	88	S.SRQPQSQNPKLPLSIL.K		16	1805.02	602.679	3	61.52	48.6	602.683	3	69.7	x	x	x	x
P80195	Glycosylation-dependent cell adhesion molecule 1	75	86	R.QPQSQNPKLPLS.I		12	1335.71	668.865	2	22.74	32.58	668.867	2	67.95	x	x
P80195	Glycosylation-dependent cell adhesion molecule 1	78	85	Q.SQNPKLPL.S		8	895.513	448.765	2	33.5	33.95	448.766	2	56.92	x	x		x
P80195	Glycosylation-dependent cell adhesion molecule 1	78	86	Q.SQNPKLPLS.I		9	982.545	492.28	2	30.85	31.5	492.279	2	61.46	x	x	x	x
P80195	Glycosylation-dependent cell adhesion molecule 1	78	88	Q.SQNPKLPLSIL.K		11	1208.71	605.366	2	36.68	52.77	605.373	2	70	x	x	x	x
P80195	Glycosylation-dependent cell adhesion molecule 1	78	89	Q.SQNPKLPLSILK.E		12	1336.81	446.611	3	56.72	43.75	446.61	3	59.17		x
P80195	Glycosylation-dependent cell adhesion molecule 1	78	93	Q.SQNPKLPLSILKEKHL.R		16	1844.09	462.03	4	111.29	41.92	462.031	4	62.04	x	x		x
P80195	Glycosylation-dependent cell adhesion molecule 1	80	88	Q.NPKLPLSIL.K		9	993.622	497.819	2	29.83	53.81	497.822	2	41.92		x
P80195	Glycosylation-dependent cell adhesion molecule 1	83	93	K.LPLSILKEKHL.R		11	1289.81	430.943	3	73.55	41.18	430.943	3	60.67	x	x		x
P80195	Glycosylation-dependent cell adhesion molecule 1	125	139	K.IMRNLENTVKETIKY.L		15	1850.99	618.009	3	117.33	42.82	618.01	3	66.11				x
P80195	Glycosylation-dependent cell adhesion molecule 1	127	139	M.RNLENTVKETIKY.L		13	1606.87	536.631	3	93.32	36.41	536.639	3	84.7	x	x	x	x
P80195	Glycosylation-dependent cell adhesion molecule 1	128	139	R.NLENTVKETIKY.L		12	1450.77	484.597	3	78.75	41.87	484.605	3	45.66	x	x		x
P80195	Glycosylation-dependent cell adhesion molecule 1	129	139	N.LENTVKETIKY.L		11	1336.72	446.583	3	94.52	31.06	669.373	2	65.5	x	x	x	x
P80195	Glycosylation-dependent cell adhesion molecule 1	130	139	L.ENTVKETIKY.L		10	1223.64	408.887	3	79.59	27.06	612.832	2	62.42	x	x	x	x
P80195	Glycosylation-dependent cell adhesion molecule 1	131	139	E.NTVKETIKY.L		9	1094.6	548.306	2	38.31	24.91	548.31	2	58.2	x	x		x
P80195	Glycosylation-dependent cell adhesion molecule 1	132	139	N.TVKETIKY.L		8	980.554	491.286	2	32.86	23.47	491.29	2	57.01	x	x		x
P80195	Glycosylation-dependent cell adhesion molecule 1	140	153	Y.LKSLFSHAFEVVKT		14	1604.89	402.231	4	99.21	46.73	535.972	3	67.21	x	x
P80195	Glycosylation-dependent cell adhesion molecule 1	141	148	L.KSLFSHAF.E		8	935.486	468.752	2	40.65	37.11	468.752	2	60.12	x	x		x
P80195	Glycosylation-dependent cell adhesion molecule 1	141	153	L.KSLFSHAFEVVKT		13	1491.81	498.276	3	89.17	42.31	498.273	3	65.01	x	x		x
P80195	Glycosylation-dependent cell adhesion molecule 1	142	153	K.SLFSHAFEVVKT		12	1363.71	455.579	3	81.76	49.16	455.577	3	67.33	x	x
P80195	Glycosylation-dependent cell adhesion molecule 1	144	153	L.FSHAFEVVKT		10	1163.6	582.809	2	41.35	33.61	582.809	2	76.54	x	x		x
P80195	Glycosylation-dependent cell adhesion molecule 1	145	153	F.SHAFEVVKT		9	1016.53	509.274	2	49.14	26.1	509.283	2	78.69	x	x	x	x
P80195	Glycosylation-dependent cell adhesion molecule 1	146	153	S.HAFEVVKT		8	929.497	465.757	2	59.07	25.42	465.76	2	70.09	x	x	x	x
P02668	Kappa-casein	39	46	F.FSDKIAKY.I		8	970.512	486.265	2	41.39	27.13	486.267	2	62.1	x	x		x
P02668	Kappa-casein	52	58	Y.VLSRYPS.Y		7	820.444	411.23	2	25.22	21.37	411.23	2	43.65			x	x
P02668	Kappa-casein	52	59	Y.VLSRYPSY.G		8	983.508	492.762	2	37.88	30.34	492.765	2	63.31		x		x
P02668	Kappa-casein	52	61	Y.VLSRYPSYGL.N		10	1153.61	577.815	2	42.96	39.96	577.826	2	57.65		x		x
P02668	Kappa-casein	52	62	Y.VLSRYPSYGLN.Y		11	1267.66	634.839	2	57.36	36.08	634.836	2	76.99	x	x	x	x
P02668	Kappa-casein	55	69	S.RYPSYGLNYYQQKPV.A		15	1874.93	625.987	3	91.69	38.91	625.99	3	77.09			x
P02668	Kappa-casein	59	69	S.YGLNYYQQKPV.A		11	1371.68	686.85	2	55.93	37.09	686.856	2	68.7			x
P02668	Kappa-casein	60	69	Y.GLNYYQQKPV.A		10	1208.62	605.318	2	33.13	31.92	605.322	2	65.21			x
P02668	Kappa-casein	61	69	G.LNYYQQKPV.A		9	1151.6	576.807	2	34.44	29.38	576.813	2	58.92			x
P02668	Kappa-casein	61	70	G.LNYYQQKPVA.L		10	1222.63	612.326	2	43.57	29.37	612.323	2	55.54			x
P02668	Kappa-casein	62	69	L.NYYQQKPV.A		8	1038.51	520.265	2	42.2	23.62	520.267	2	51.71			x
P02668	Kappa-casein	62	71	L.NYYQQKPVAL.I		10	1222.63	612.325	2	44.24	34.32	612.328	2	63.24	x	x	x	x
P02668	Kappa-casein	63	69	N.YYQQKPV.A		7	924.471	463.244	2	22.77	19.82	463.248	2	51.86			x
P02668	Kappa-casein	63	71	N.YYQQKPVAL.I		9	1108.59	555.304	2	41.07	32.3	555.303	2	66.26	x	x	x	x
P02668	Kappa-casein	64	71	Y.YQQKPVAL.I		8	945.528	473.773	2	45.59	27.67	473.772	2	62.89	x	x	x	x
P02668	Kappa-casein	65	74	Y.QQKPVALINN.Q		10	1123.63	562.826	2	27.51	28.03	562.828	2	66.57	x	x
P02668	Kappa-casein	72	86	L.INNQFLPYPYYAKPA.A		15	1797.91	600.311	3	82.98	49.82	899.966	2	76.61	x	x
P02668	Kappa-casein	76	88	Q.FLPYPYYAKPAAV.R		13	1498.79	750.403	2	32.34	48.5	750.403	2	67.47			x
P02668	Kappa-casein	77	86	F.LPYPYYAKPA.A		10	1181.61	591.815	2	31.37	37.13	591.816	2	66.86	x	x	x
P02668	Kappa-casein	77	88	F.LPYPYYAKPAAV.R		12	1351.72	676.869	2	27.86	41.88	676.862	2	63.37			x
P02668	Kappa-casein	81	88	P.YYAKPAAV.R		8	881.465	441.74	2	40.09	24.55	441.742	2	53.07			x
P02668	Kappa-casein	81	93	P.YYAKPAAVRSPAQ.I		13	1420.75	474.59	3	64.53	24.32	474.591	3	67.25			x	x
P02668	Kappa-casein	87	95	A.AVRSPAQIL.Q		9	953.566	477.791	2	30.22	36.44	477.792	2	50.22	x	x	x
P02668	Kappa-casein	87	96	A.AVRSPAQILQ.W		10	1081.62	541.82	2	29.2	34.97	541.822	2	43.19	x		x
P02668	Kappa-casein	87	97	A.AVRSPAQILQW.Q		11	1267.7	634.861	2	40.31	52.28	634.861	2	56.57	x	x	x	x
P02668	Kappa-casein	88	97	A.VRSPAQILQW.Q		10	1196.67	599.342	2	29.59	51.12	599.343	2	50.06			x	x
P02668	Kappa-casein	115	126	T.TM(+15.99)ARHPHPHLSF.M	Oxidation (M)	12	1445.7	482.907	3	61.35	25.32	482.907	3	55.26	x	x	x	x
P02668	Kappa-casein	115	126	T.TMARHPHPHLSF.M		12	1429.7	477.576	3	61.62	27.32	477.583	3	58.54			x	x
P02668	Kappa-casein	117	126	M.ARHPHPHLSF.M		10	1197.62	400.212	3	41.45	25.07	400.216	3	63.22	x	x	x	x
P02668	Kappa-casein	120	126	H.PHPHLSF.M		7	833.418	417.717	2	34.79	29.47	417.722	2	59.17			x	x
P02668	Kappa-casein	127	144	F.M(+15.99)AIPPKKNQDKTEIPTIN.T	Oxidation (M)	18	2053.09	514.281	4	87.12	28.56	685.37	3	65.49	x	x	x	x
P02668	Kappa-casein	127	144	F.MAIPPKKNQDKTEIPTIN.T		18	2037.09	510.281	4	88.94	32.32	680.04	3	55.19	x	x	x	x
P02668	Kappa-casein	127	145	F.MAIPPKKNQDKTEIPTINT.I		19	2138.14	535.545	4	93.22	33.29	713.723	3	33.4	x	x		x
P02668	Kappa-casein	128	142	M.AIPPKKNQDKTEIPT.I		15	1678.93	420.738	4	92.79	27.06	560.657	3	31.73	x	x	x
P02668	Kappa-casein	129	142	A.IPPKKNQDKTEIPT.I		14	1607.89	402.981	4	88.54	20.46	536.975	3	40.61	x		x
P02668	Kappa-casein	129	143	A.IPPKKNQDKTEIPTI.N		15	1720.97	431.25	4	87.8	31.69	574.67	3	31.35	x		x
P02668	Kappa-casein	130	142	I.PPKKNQDKTEIPT.I		13	1494.8	499.275	3	64.77	21.41	748.413	2	60.9	x		x
P02668	Kappa-casein	135	142	N.QDKTEIPT.I		8	930.466	466.241	2	29.52	21.78	466.24	2	36.23	x		x
P02668	Kappa-casein	135	144	N.QDKTEIPTIN.T		10	1157.59	579.804	2	22.28	32.61	579.804	2	50.16	x	x
P02668	Kappa-casein	170	190	D.S(+79.97)PEVIESPPEINTVQVTSTAV	Phosphorylation (STY)	21	2276.08	759.703	3	59.12	55.64	1139.06	2	91.52	x	x	x	x
P02668	Kappa-casein	170	190	D.SPEVIESPPEINTVQVTSTAV		21	2196.12	733.051	3	46.16	51.68	1099.07	2	85.52				x
P02668	Kappa-casein	171	190	S.PEVIESPPEINTVQVTSTAV		20	2109.08	704.04	3	69.68	51.78	1055.55	2	83.84	x	x	x	x
P02668	Kappa-casein	172	190	P.EVIESPPEINTVQVTSTAV		19	2012.03	671.688	3	100.04	50.59	1007.03	2	89.61		x	x	x
P02668	Kappa-casein	173	181	E.VIESPPEIN.T		9	996.513	499.264	2	28.65	34.77	499.27	2	71.8	x	x		x
P02668	Kappa-casein	173	190	E.VIESPPEINTVQVTSTAV		18	1882.99	628.674	3	28.26	48.86	942.51	2	95.27	x	x	x	x
P02668	Kappa-casein	180	190	E.INTVQVTSTAV		11	1131.61	566.817	2	35.17	36.44	566.827	2	61.66	x	x	x	x
P02668	Kappa-casein	182	190	N.TVQVTSTAV		9	904.487	453.251	2	40.44	29.47	453.257	2	54.2	x	x	x	x
P80025	Lactoperoxidase	23	42	S.DTIAQAASTTTISDAVSKVK.I		20	2006.05	669.693	3	38.25	45.79	669.692	3	67.87	x	x
P80025	Lactoperoxidase	83	96	R.TAIRNGQVWEESLK.R		14	1629.85	544.29	3	85.51	36.28	544.293	3	50.87	x	x
P80025	Lactoperoxidase	88	96	N.GQVWEESLK.R		9	1074.53	538.275	2	39.56	35.85	538.278	2	40.26	x	x
P80025	Lactoperoxidase	88	98	N.GQVWEESLKRL.R		11	1343.72	448.915	3	66.17	44.54	448.918	3	55.05	x	x	x
P11151	Lactoperoxidase	29	43	A.DRITGGKDFRDIESK.F		15	1735.89	434.98	4	88.37	27.75	434.981	4	79.85	x	x		x
Q8MI01	Mucin-15	270	280	R.LYDDRNEPVLR.L		11	1388.7	463.908	3	70.49	29.84	463.911	3	32.02	x	x
P31096	Osteopontin	264	278	K.IRIS(+79.97)HELDSASSEVN	Phosphorylation (STY)	15	1735.78	579.601	3	36.6	37.65	868.903	2	71.15	x
Q9TUM6	Perilipin-2	66	77	A.LPIIQKLEPQIA.V		12	1361.83	681.924	2	24.93	51.59	681.926	2	68.22	x	x		x
Q9TUM6	Perilipin-2	239	254	R.VEEAKRKGQETISQLH.S		16	1851.98	464.003	4	127.44	22.23	464.002	4	32.95	x	x		x
P81265	Polymeric immunoglobulin receptor	576	592	K.AAPAGAAIQSRAGEIQN.K		17	1623.83	542.284	3	83.28	29.45	812.922	2	94.39	x	x		x
P81265	Polymeric immunoglobulin receptor	576	593	K.AAPAGAAIQSRAGEIQNK.A		18	1751.93	584.983	3	58.95	27.79	584.991	3	41.29	x	x	x	x
P81265	Polymeric immunoglobulin receptor	577	592	A.APAGAAIQSRAGEIQN.K		16	1552.8	777.406	2	23.77	28.3	777.413	2	75.41	x
P81265	Polymeric immunoglobulin receptor	587	597	R.AGEIQNKALLD.P		11	1170.62	586.321	2	46.83	31.29	586.322	2	65.59	x	x	x	x
P81265	Polymeric immunoglobulin receptor	587	601	R.AGEIQNKALLDPSFF.A		15	1648.85	825.434	2	24.91	56.35	825.439	2	82.28		x
P81265	Polymeric immunoglobulin receptor	587	624	R.AGEIQNKALLDPSFFAKESVKDAAGGPGAPADPGRPTG.Y		38	3735.89	748.188	5	43.44	48.43	934.987	4	74			x	x
P81265	Polymeric immunoglobulin receptor	587	631	R.AGEIQNKALLDPSFFAKESVKDAAGGPGAPADPGRPTGYSGSSKA.L		45	4416.2	737.043	6	59.35	47.37	884.252	5	44.96	x	x	x	x
P81265	Polymeric immunoglobulin receptor	587	632	R.AGEIQNKALLDPSFFAKESVKDAAGGPGAPADPGRPTGYSGSSKAL.V		46	4529.28	755.891	6	41.87	49.28	906.868	5	41.96	x	x
P81265	Polymeric immunoglobulin receptor	594	623	K.ALLDPSFFAKESVKDAAGGPGAPADPGRPT.G		30	2938.48	735.631	4	85.12	50.45	735.63	4	77.09	x		x
P81265	Polymeric immunoglobulin receptor	594	624	K.ALLDPSFFAKESVKDAAGGPGAPADPGRPTG.Y		31	2995.5	749.889	4	79.3	50.28	999.51	3	68.94			x	x
P81265	Polymeric immunoglobulin receptor	594	625	K.ALLDPSFFAKESVKDAAGGPGAPADPGRPTGY.S		32	3158.57	790.652	4	46.11	52.59	790.653	4	66.35	x
P81265	Polymeric immunoglobulin receptor	594	628	K.ALLDPSFFAKESVKDAAGGPGAPADPGRPTGYSGS.S		35	3389.65	848.424	4	42.79	51.31	848.426	4	78.38	x	x
P81265	Polymeric immunoglobulin receptor	594	631	K.ALLDPSFFAKESVKDAAGGPGAPADPGRPTGYSGSSKA.L		38	3675.82	736.173	5	87.27	48.7	919.966	4	36.24	x	x	x	x
P81265	Polymeric immunoglobulin receptor	594	632	K.ALLDPSFFAKESVKDAAGGPGAPADPGRPTGYSGSSKAL.V		39	3788.9	758.791	5	57.23	50.46	948.23	4	39.55	x	x	x	x
P81265	Polymeric immunoglobulin receptor	600	631	S.FFAKESVKDAAGGPGAPADPGRPTGYSGSSKA.L		32	3079.5	770.883	4	90.43	32.38	770.883	4	56.35	x	x	x	x
P81265	Polymeric immunoglobulin receptor	601	631	F.FAKESVKDAAGGPGAPADPGRPTGYSGSSKA.L		31	2932.43	734.115	4	109.69	28.16	734.118	4	69.11	x	x	x	x
P81265	Polymeric immunoglobulin receptor	602	624	F.AKESVKDAAGGPGAPADPGRPTG.Y		23	2105.05	527.271	4	98.08	22.97	702.695	3	71.5				x
P81265	Polymeric immunoglobulin receptor	602	631	F.AKESVKDAAGGPGAPADPGRPTGYSGSSKA.L		30	2785.36	697.351	4	119.01	24.8	697.353	4	69.5	x	x	x	x
P81265	Polymeric immunoglobulin receptor	602	632	F.AKESVKDAAGGPGAPADPGRPTGYSGSSKAL.V		31	2898.45	725.622	4	110.72	28.91	725.62	4	68.6	x	x		x
P81265	Polymeric immunoglobulin receptor	605	623	E.SVKDAAGGPGAPADPGRPT.G		19	1719.85	574.292	3	70.92	23.15	574.295	3	64.83	x
P81265	Polymeric immunoglobulin receptor	605	624	E.SVKDAAGGPGAPADPGRPTG.Y		20	1776.88	593.302	3	71.7	23.28	593.303	3	57.95				x
P81265	Polymeric immunoglobulin receptor	606	623	S.VKDAAGGPGAPADPGRPT.G		18	1632.82	545.281	3	63.81	21.81	545.287	3	65.27	x		x
P81265	Polymeric immunoglobulin receptor	609	631	D.AAGGPGAPADPGRPTGYSGSSKA.L		23	2027.97	676.996	3	52.58	24.63	677.001	3	52.69	x	x	x
P81265	Polymeric immunoglobulin receptor	619	632	D.PGRPTGYSGSSKAL.V		14	1376.7	459.909	3	102.11	23.21	459.909	3	68.24	x	x		x
P81265	Polymeric immunoglobulin receptor	619	635	D.PGRPTGYSGSSKALVST.L		17	1663.85	555.627	3	80.04	26.85	555.624	3	52.47	x	x		x
P81265	Polymeric immunoglobulin receptor	619	640	D.PGRPTGYSGSSKALVSTLVPLA.L		22	2157.18	720.071	3	67.02	50.39	720.072	3	64.57	x	x	x	x
P81265	Polymeric immunoglobulin receptor	625	635	G.YSGSSKALVST.L		11	1098.56	550.286	2	65.94	24.01	550.291	2	71.33			x	x
P81265	Polymeric immunoglobulin receptor	625	640	G.YSGSSKALVSTLVPLA.L		16	1591.88	796.954	2	33.75	53.23	796.953	2	53.59				x
P61823	Ribonuclease pancreatic	140	150	N.PYVPVHFDASV		11	1229.61	615.815	2	27.76	45.96	615.811	2	72.29				x
P35541	Serum amyloid A protein	120	130	N.HFRPAGLPDKY		11	1299.67	434.231	3	56.53	31.6	434.232	3	30.82	x	x		x
Q27960	Sodium-dependent phosphate transport protein 2B	5	26	W.PELENSQPTSEKYTVKADGEQS.A		22	2436.13	813.052	3	22.21	29.4	813.053	3	43.83	x	x
Q27960	Sodium-dependent phosphate transport protein 2B	26	53	Q.SAKPEKAKETEKDDTGTPITKIELVPSH.S		28	3048.6	610.729	5	115.72	33.91	610.735	5	60.94	x	x		x
Q27960	Sodium-dependent phosphate transport protein 2B	27	53	S.AKPEKAKETEKDDTGTPITKIELVPSH.S		27	2961.57	593.321	5	108.34	34.28	741.403	4	75.36	x	x	x	x
O46375	Transthyretin	137	147	Y.STTALVSSPKA		11	1060.58	531.297	2	24.04	25.89	531.298	2	59.7				x
*Start and End position as given by the PEAKS output (including the signal peptides of proteins)

## Sheet: Table S6 Human Milk
Table S6: List of peptides in human milk of donor 1 (D1) and donor 2(D2) identified by ETD and CID. An 'x' indicates that the peptide was identified in the brand.
Accession	Protein	Start*	End*	Peptide	Modification	Length	Mass	m/z (ETD)	z (ETD)	-10lgP (ETD)	Retention time (ETD)	m/z (CID)	z (CID)	-10lgP (CID)	D1	D2
P47710	Alpha-S1-casein	16	25	A.RPKLPLRYPE.R		10	1267.74	423.587	3	39.41	32.32	423.594	3	34.36	x	x
P47710	Alpha-S1-casein	16	27	A.RPKLPLRYPERL.Q		12	1536.93	513.315	3	43.26	36.02	385.241	4	33.61	x	x
P47710	Alpha-S1-casein	16	28	A.RPKLPLRYPERLQ.N		13	1664.98	417.253	4	56.88	34.22	417.26	4	35.66	x	x
P47710	Alpha-S1-casein	16	30	A.RPKLPLRYPERLQNP.S		15	1876.08	470.027	4	64.71	35.39	470.03	4	39.94	x	x
P47710	Alpha-S1-casein	16	32	A.RPKLPLRYPERLQNPSE.S		17	2092.15	524.045	4	40.81	35.34	524.056	4	33.77	x	x
P47710	Alpha-S1-casein	16	50	A.RPKLPLRYPERLQNPSESSEPIPLESREEYM(+15.99)NGM(+15.99)N.R	Oxidation (M)	35	4188.04	838.617	5	31.1	42.64	838.617	5	33.81	x	x
P47710	Alpha-S1-casein	16	50	A.RPKLPLRYPERLQNPSESSEPIPLESREEYMNGMN.R		35	4156.05	832.221	5	24.12	45.77	832.224	5	35.83	x	x
P47710	Alpha-S1-casein	16	51	A.RPKLPLRYPERLQNPS(+79.97)ESSEPIPLES(+79.97)REEYMNGMNR.Q	Phosphorylation (STY)	36	4472.08	895.427	5	41.04	46.72	895.428	5	31.98		x
P47710	Alpha-S1-casein	16	51	A.RPKLPLRYPERLQNPSES(+79.97)SEPIPLES(+79.97)REEYMNGMNR.Q	Phosphorylation (STY)	36	4472.08	746.356	6	35.86	46.82	895.426	5	34.41		x
P47710	Alpha-S1-casein	16	51	A.RPKLPLRYPERLQNPSESS(+79.97)EPIPLESREEYMNGM(+15.99)NR.Q	Phosphorylation (STY); Oxidation (M)	36	4408.11	882.631	5	30.79	43.41	882.636	5	29.1		x
P47710	Alpha-S1-casein	16	51	A.RPKLPLRYPERLQNPSESSEPIPLES(+79.97)REEYMNGMNR.Q	Phosphorylation (STY)	36	4392.11	879.431	5	51.71	45.75	879.435	5	31.65	x	x
P47710	Alpha-S1-casein	16	51	A.RPKLPLRYPERLQNPSESSEPIPLESREEYM(+15.99)NGMNR.Q	Oxidation (M)	36	4328.14	866.638	5	68.93	42.9	866.644	5	24	x	x
P47710	Alpha-S1-casein	16	51	A.RPKLPLRYPERLQNPSESSEPIPLESREEYMNGMNR.Q		36	4312.15	863.439	5	73.49	44.56	863.444	5	35.93	x	x
P47710	Alpha-S1-casein	19	51	K.LPLRYPERLQNPSESSEPIPLESREEYMNGMNR.Q		33	3930.9	787.188	5	80.23	46.92	787.191	5	27.27		x
P47710	Alpha-S1-casein	26	51	E.RLQNPSES(+79.97)SEPIPLES(+79.97)REEYMNGMNR.Q	Phosphorylation (STY)	26	3222.35	806.597	4	51.94	44.72	806.6	4	36.82		x
P47710	Alpha-S1-casein	26	51	E.RLQNPSESSEPIPLES(+79.97)REEYM(+15.99)NGMNR.Q	Phosphorylation (STY); Oxidation (M)	26	3158.38	790.604	4	57.04	38.85	1053.81	3	32.87	x	x
P47710	Alpha-S1-casein	26	51	E.RLQNPSESSEPIPLES(+79.97)REEYMNGM(+15.99)NR.Q	Phosphorylation (STY); Oxidation (M)	26	3158.38	790.604	4	75.2	39.93	1053.81	3	37.59	x	x
P47710	Alpha-S1-casein	26	51	E.RLQNPSESSEPIPLES(+79.97)REEYMNGMNR.Q	Phosphorylation (STY)	26	3142.38	786.605	4	64.53	43.02	1048.48	3	54.7	x	x
P47710	Alpha-S1-casein	26	51	E.RLQNPSESSEPIPLESREEYM(+15.99)NGM(+15.99)NR.Q	Oxidation (M)	26	3094.41	774.61	4	91	35.01	774.614	4	40.08	x	x
P47710	Alpha-S1-casein	26	51	E.RLQNPSESSEPIPLESREEYM(+15.99)NGMNR.Q	Oxidation (M)	26	3078.41	770.612	4	73.63	37.5	770.615	4	30.59	x	x
P47710	Alpha-S1-casein	26	51	E.RLQNPSESSEPIPLESREEYMNGMNR.Q		26	3062.42	766.615	4	83.46	40.8	766.616	4	41.98	x	x
P47710	Alpha-S1-casein	52	68	R.QRNILREKQTDEIKDTR.N		17	2142.15	536.544	4	102.61	23.57	429.446	5	51.81	x	x
P47710	Alpha-S1-casein	53	68	Q.RNILREKQTDEIKDTR.N		16	2014.09	504.53	4	79.38	23.28	403.832	5	35.08	x	x
P47710	Alpha-S1-casein	54	65	R.NILREKQTDEIK.D		12	1485.82	496.278	3	55.72	24.41	496.275	3	29.09	x	x
P47710	Alpha-S1-casein	54	68	R.NILREKQTDEIKDTR.N		15	1857.99	465.505	4	82.41	24.85	620.339	3	46.72	x	x
P47710	Alpha-S1-casein	55	68	N.ILREKQTDEIKDTR.N		14	1743.95	436.993	4	73.62	21.59	436.987	4	33.17		x
P47710	Alpha-S1-casein	56	68	I.LREKQTDEIKDTR.N		13	1630.86	544.629	3	30.37	24.93	544.629	3	30.66		x
P47710	Alpha-S1-casein	107	125	L.NEYNQLQLQAAHAQEQIRR.M		19	2309.16	578.298	4	42.48	39.55	578.304	4	25.91		x
P05814	Beta-casein	16	33	A.RETIESLS(+79.97)SS(+79.97)EESITEYK.Q	Phosphorylation (STY)	18	2246.92	749.982	3	73.95	42.01	749.984	3	44.13		x
P05814	Beta-casein	16	33	A.RETIESLSS(+79.97)S(+79.97)EESITEYK.Q	Phosphorylation (STY)	18	2246.92	749.983	3	60.82	43.45	1124.47	2	49.29	x	x
P05814	Beta-casein	16	33	A.RETIESLSS(+79.97)SEESITEYK.Q	Phosphorylation (STY)	18	2166.96	723.328	3	84.45	43.83	1084.5	2	54.52	x	x
P05814	Beta-casein	16	33	A.RETIESLSSS(+79.97)EESITEYK.Q	Phosphorylation (STY)	18	2166.96	723.327	3	86.37	40.77	1084.49	2	51.08	x	x
P05814	Beta-casein	16	33	A.RETIESLSSSEESITEYK.Q		18	2086.99	696.672	3	142.29	41.06	1044.51	2	56.86	x	x
P05814	Beta-casein	16	35	A.RETIESLSS(+79.97)S(+79.97)EESITEYKQK.V	Phosphorylation (STY)	20	2503.08	626.777	4	80.96	39.16	835.373	3	45.6	x	x
P05814	Beta-casein	16	35	A.RETIESLSS(+79.97)SEESITEYKQK.V	Phosphorylation (STY)	20	2423.11	606.785	4	105.57	40.25	808.717	3	54.71	x	x
P05814	Beta-casein	16	35	A.RETIESLSSS(+79.97)EESITEYKQK.V	Phosphorylation (STY)	20	2423.11	606.786	4	83.65	36.97	808.716	3	52.15	x	x
P05814	Beta-casein	16	35	A.RETIESLSSSEESITEYKQK.V		20	2343.14	586.793	4	120.72	37.97	586.795	4	59.14	x	x
P05814	Beta-casein	16	38	A.RETIESLS(+79.97)SS(+79.97)EESITEYKQKVEK.V	Phosphorylation (STY)	23	2859.28	715.829	4	77.35	38.55	954.107	3	44.48		x
P05814	Beta-casein	16	38	A.RETIESLSS(+79.97)S(+79.97)EESITEYKQKVEK.V	Phosphorylation (STY)	23	2859.28	715.83	4	87.19	39.57	954.105	3	52.83	x	x
P05814	Beta-casein	16	38	A.RETIESLSS(+79.97)SEESITEYKQKVEK.V	Phosphorylation (STY)	23	2779.32	695.838	4	93.02	41.76	695.852	4	54.47	x	x
P05814	Beta-casein	16	38	A.RETIESLSSS(+79.97)EESITEYKQKVEK.V	Phosphorylation (STY)	23	2779.32	695.838	4	115.2	37.93	695.848	4	56.68	x	x
P05814	Beta-casein	16	38	A.RETIESLSSSEESITEYKQKVEK.V		23	2699.35	675.846	4	117.75	39.75	540.883	5	63.97	x	x
P05814	Beta-casein	16	40	A.RETIESLSS(+79.97)S(+79.97)EESITEYKQKVEKVK.H	Phosphorylation (STY)	25	3086.45	618.297	5	65.95	40.27	772.62	4	29.48		x
P05814	Beta-casein	16	40	A.RETIESLSS(+79.97)SEESITEYKQKVEKVK.H	Phosphorylation (STY)	25	3006.48	752.628	4	68	42.75	602.302	5	42.54	x	x
P05814	Beta-casein	16	40	A.RETIESLSSS(+79.97)EESITEYKQKVEKVK.H	Phosphorylation (STY)	25	3006.48	752.628	4	72.09	38.9	752.63	4	34.53	x	x
P05814	Beta-casein	16	40	A.RETIESLSSSEESITEYKQKVEKVK.H		25	2926.51	586.31	5	85.05	40.83	586.311	5	47.5	x	x
P05814	Beta-casein	16	41	A.RETIESLSSSEESITEYKQKVEKVKH.E		26	3063.57	766.9	4	52.8	39.11	613.719	5	37.24	x
P05814	Beta-casein	16	42	A.RETIESLSSS(+79.97)EESITEYKQKVEKVKHE.D	Phosphorylation (STY)	27	3272.58	655.523	5	48.52	37.69	655.524	5	37.54	x	x
P05814	Beta-casein	16	47	A.RETIESLSS(+79.97)SEESITEYKQKVEKVKHEDQQQG.E	Phosphorylation (STY)	32	3828.81	639.142	6	31.34	40.87	958.213	4	40.52	x	x
P05814	Beta-casein	16	47	A.RETIESLSSS(+79.97)EESITEYKQKVEKVKHEDQQQG.E	Phosphorylation (STY)	32	3828.81	766.769	5	52.56	37.89	958.219	4	42.3	x	x
P05814	Beta-casein	16	47	A.RETIESLSSSEESITEYKQKVEKVKHEDQQQG.E		32	3748.84	750.776	5	44.84	39.42	750.783	5	51.59	x	x
P05814	Beta-casein	16	53	A.RETIESLSSSEESITEYKQKVEKVKHEDQQQGEDEHQD.K		38	4502.1	751.357	6	43.85	39.01	901.425	5	39.09		x
P05814	Beta-casein	16	54	A.RETIESLSS(+79.97)SEESITEYKQKVEKVKHEDQQQGEDEHQDK.I	Phosphorylation (STY)	39	4710.16	673.888	7	47.75	39.18	943.046	5	53.37	x	x
P05814	Beta-casein	16	54	A.RETIESLSSS(+79.97)EESITEYKQKVEKVKHEDQQQGEDEHQDK.I	Phosphorylation (STY)	39	4710.16	786.036	6	49.86	39.18	943.041	5	51.87	x	x
P05814	Beta-casein	16	54	A.RETIESLSSSEESITEYKQKVEKVKHEDQQQGEDEHQDK.I		39	4630.19	662.464	7	39.93	38.1	927.051	5	59.75	x	x
P05814	Beta-casein	16	57	A.RETIESLSS(+79.97)SEESITEYKQKVEKVKHEDQQQGEDEHQDKIYP.S	Phosphorylation (STY)	42	5083.36	848.236	6	34.92	42.51	1017.68	5	39.44	x	x
P05814	Beta-casein	16	57	A.RETIESLSSSEESITEYKQKVEKVKHEDQQQGEDEHQDKIYP.S		42	5003.39	834.906	6	35.67	41.64	1001.69	5	47.28	x	x
P05814	Beta-casein	17	33	R.ETIESLSS(+79.97)S(+79.97)EESITEYK.Q	Phosphorylation (STY)	17	2090.82	697.949	3	102.17	47.67	1046.42	2	42.52	x	x
P05814	Beta-casein	17	33	R.ETIESLSS(+79.97)SEESITEYK.Q	Phosphorylation (STY)	17	2010.86	671.293	3	93.21	47.34	1006.45	2	50.59	x	x
P05814	Beta-casein	17	33	R.ETIESLSSS(+79.97)EESITEYK.Q	Phosphorylation (STY)	17	2010.86	671.293	3	99.25	44.2	1006.44	2	51.12	x	x
P05814	Beta-casein	17	33	R.ETIESLSSSEESITEYK.Q		17	1930.89	644.638	3	113.69	44.16	966.464	2	54.36	x	x
P05814	Beta-casein	17	35	R.ETIESLSS(+79.97)SEESITEYKQK.V	Phosphorylation (STY)	19	2267.01	756.678	3	38.5	42.66	756.684	3	46.93	x	x
P05814	Beta-casein	17	35	R.ETIESLSSSEESITEYKQK.V		19	2187.04	730.022	3	49.8	40.44	730.028	3	55.02	x	x
P05814	Beta-casein	17	38	R.ETIESLSS(+79.97)S(+79.97)EESITEYKQKVEK.V	Phosphorylation (STY)	22	2703.18	676.803	4	61.31	41.59	902.073	3	38.69		x
P05814	Beta-casein	17	38	R.ETIESLSS(+79.97)SEESITEYKQKVEK.V	Phosphorylation (STY)	22	2623.22	656.812	4	67.84	43.65	875.42	3	44.55	x	x
P05814	Beta-casein	17	38	R.ETIESLSSS(+79.97)EESITEYKQKVEK.V	Phosphorylation (STY)	22	2623.22	656.812	4	73.15	39.99	875.422	3	44.99		x
P05814	Beta-casein	17	38	R.ETIESLSSSEESITEYKQKVEK.V		22	2543.25	636.821	4	87.12	41.64	636.826	4	51.37	x	x
P05814	Beta-casein	18	33	E.TIESLSS(+79.97)S(+79.97)EESITEYK.Q	Phosphorylation (STY)	16	1961.78	654.935	3	78.08	46.05	981.901	2	47.24		x
P05814	Beta-casein	18	33	E.TIESLSS(+79.97)SEESITEYK.Q	Phosphorylation (STY)	16	1881.81	628.279	3	90.96	45.37	941.919	2	54.02	x	x
P05814	Beta-casein	19	38	T.IESLSS(+79.97)S(+79.97)EESITEYKQKVEK.V	Phosphorylation (STY)	20	2473.09	619.28	4	53.45	38.88	825.375	3	30.82		x
P05814	Beta-casein	19	38	T.IESLSSSEESITEYKQKVEK.V		20	2313.16	579.297	4	84.38	39.03	579.303	4	48.6	x	x
P05814	Beta-casein	20	31	I.ESLSSSEESITE.Y		12	1296.56	649.286	2	21.8	33.18	649.291	2	41.01	x	x
P05814	Beta-casein	20	38	I.ESLSSSEESITEYKQKVEK.V		19	2200.07	551.025	4	96.91	35.76	551.028	4	38.43	x	x
P05814	Beta-casein	21	33	E.SLSSSEESITEYK.Q		13	1458.67	730.343	2	24.31	34.74	730.355	2	53.64	x	x
P05814	Beta-casein	21	38	E.SLSS(+79.97)S(+79.97)EESITEYKQKVEK.V	Phosphorylation (STY)	18	2230.96	558.748	4	60.54	35.42	744.672	3	39.86		x
P05814	Beta-casein	21	38	E.SLSS(+79.97)SEESITEYKQKVEK.V	Phosphorylation (STY)	18	2151	538.756	4	88.07	37.28	718.014	3	42.93	x	x
P05814	Beta-casein	21	38	E.SLSSS(+79.97)EESITEYKQKVEK.V	Phosphorylation (STY)	18	2151	538.756	4	90.12	33.37	718.011	3	44.72	x	x
P05814	Beta-casein	21	38	E.SLSSSEESITEYKQKVEK.V		18	2071.03	518.765	4	101.1	34.49	518.769	4	48.08	x	x
P05814	Beta-casein	21	54	E.SLSSSEESITEYKQKVEKVKHEDQQQGEDEHQDK.I		34	4001.87	667.986	6	50.47	33.72	801.386	5	26.65	x	x
P05814	Beta-casein	22	33	S.LSSSEESITEYK.Q		12	1371.64	686.827	2	34.2	30.98	686.834	2	48.49	x	x
P05814	Beta-casein	23	33	L.SSSEESITEYK.Q		11	1258.56	630.286	2	36.21	26.5	630.291	2	48.17	x	x
P05814	Beta-casein	23	35	L.SS(+79.97)S(+79.97)EESITEYKQK.V	Phosphorylation (STY)	13	1674.64	559.221	3	32.44	27.48	838.328	2	25.25		x
P05814	Beta-casein	23	35	L.SSS(+79.97)EESITEYKQK.V	Phosphorylation (STY)	13	1594.68	532.566	3	52.94	24.84	532.567	3	28.57		x
P05814	Beta-casein	23	37	L.SSS(+79.97)EESITEYKQKVE.K	Phosphorylation (STY)	15	1822.79	608.603	3	33.22	32.24	608.605	3	28.37		x
P05814	Beta-casein	23	38	L.SS(+79.97)SEESITEYKQKVEK.V	Phosphorylation (STY)	16	1950.88	488.727	4	55.3	29.33	651.31	3	36.27	x	x
P05814	Beta-casein	23	38	L.SSS(+79.97)EESITEYKQKVEK.V	Phosphorylation (STY)	16	1950.88	651.301	3	39.83	29.27	651.309	3	43.95	x	x
P05814	Beta-casein	23	38	L.SSSEESITEYKQKVEK.V		16	1870.92	468.736	4	96.07	27.75	936.472	2	48.56	x	x
P05814	Beta-casein	24	33	S.SSEESITEYK.Q		10	1171.52	586.77	2	41.6	26.19	586.774	2	46.42	x	x
P05814	Beta-casein	25	33	S.S(+79.97)EESITEYK.Q	Phosphorylation (STY)	9	1164.46	583.237	2	22.22	28.92	583.242	2	39.55	x	x
P05814	Beta-casein	25	33	S.SEESITEYK.Q		9	1084.49	543.253	2	27.14	25.29	543.257	2	43.69	x	x
P05814	Beta-casein	25	36	S.S(+79.97)EESITEYKQKV.E	Phosphorylation (STY)	12	1519.68	507.567	3	49.99	32.15	760.852	2	36.59		x
P05814	Beta-casein	26	33	S.EESITEYK.Q		8	997.46	499.737	2	40.28	24.72	499.744	2	37.56	x	x
P05814	Beta-casein	26	36	S.EESITEYKQKV.E		11	1352.68	451.901	3	74.08	28.55	451.902	3	30.24	x	x
P05814	Beta-casein	27	33	E.ESITEYK.Q		7	868.418	435.216	2	31.43	22.35	435.217	2	34.32	x	x
P05814	Beta-casein	34	53	K.QKVEKVKHEDQQQGEDEHQD.K		20	2433.12	609.287	4	64.71	5.74	609.289	4	32.03		x
P05814	Beta-casein	34	54	K.QKVEKVKHEDQQQGEDEHQDK.I		21	2561.21	513.25	5	70.09	5.65	641.312	4	40.37	x	x
P05814	Beta-casein	34	57	K.QKVEKVKHEDQQQGEDEHQDKIYP.S		24	2934.41	587.89	5	78.8	22.07	734.614	4	38.32	x	x
P05814	Beta-casein	35	57	Q.KVEKVKHEDQQQGEDEHQDKIYP.S		23	2806.35	702.596	4	75.04	21.51	702.6	4	32.69	x	x
P05814	Beta-casein	36	57	K.VEKVKHEDQQQGEDEHQDKIYP.S		22	2678.26	536.658	5	70.97	22.69	670.582	4	32.26		x
P05814	Beta-casein	36	58	K.VEKVKHEDQQQGEDEHQDKIYPS.F		23	2765.29	554.065	5	75.39	21.4	692.326	4	24.18	x	x
P05814	Beta-casein	39	57	K.VKHEDQQQGEDEHQDKIYP.S		19	2322.05	581.52	4	106.98	22.36	581.529	4	42.74	x	x
P05814	Beta-casein	39	58	K.VKHEDQQQGEDEHQDKIYPS.F		20	2409.08	603.278	4	99.86	20.86	804.033	3	34.04	x	x
P05814	Beta-casein	39	59	K.VKHEDQQQGEDEHQDKIYPSF.Q		21	2556.15	640.045	4	67.69	32.26	640.045	4	43.75		x
P05814	Beta-casein	39	63	K.VKHEDQQQGEDEHQDKIYPSFQPQP.L		25	3006.37	752.602	4	50.47	33.73	1003.14	3	35.72	x	x
P05814	Beta-casein	39	74	K.VKHEDQQQGEDEHQDKIYPSFQPQPLIYPFVEPIPY.G		36	4338.09	868.627	5	47.35	63.18	868.629	5	32.93		x
P05814	Beta-casein	41	57	K.HEDQQQGEDEHQDKIYP.S		17	2094.89	699.303	3	68.52	23.92	699.306	3	48.76	x	x
P05814	Beta-casein	41	58	K.HEDQQQGEDEHQDKIYPS.F		18	2181.92	728.314	3	41.45	22.12	728.312	3	30.28	x	x
P05814	Beta-casein	43	57	E.DQQQGEDEHQDKIYP.S		15	1828.79	610.603	3	60.98	26.26	610.606	3	31.4	x	x
P05814	Beta-casein	43	58	E.DQQQGEDEHQDKIYPS.F		16	1915.82	639.613	3	51.85	24.38	639.611	3	35.07	x	x
P05814	Beta-casein	75	111	Y.GFLPQNILPLAQPAVVLPVPQPEIMEVPKAKDTVYTK.G		37	4040.24	674.382	6	35.35	68.22	1011.08	4	34.96	x	x
P05814	Beta-casein	81	111	N.ILPLAQPAVVLPVPQPEIMEVPKAKDTVYTK.G		31	3383.91	846.987	4	46.12	59.57	846.99	4	38.67		x
P05814	Beta-casein	83	105	L.PLAQPAVVLPVPQPEIMEVPKAK.D		23	2450.4	817.809	3	25.69	75.67	817.808	3	36.91		x
P05814	Beta-casein	83	111	L.PLAQPAVVLPVPQPEIMEVPKAKDTVYTK.G		29	3157.75	790.445	4	41.07	73.09	790.446	4	39.93		x
P05814	Beta-casein	84	111	P.LAQPAVVLPVPQPEIMEVPKAKDTVYTK.G		28	3060.69	766.181	4	99.01	53.18	766.184	4	44.78		x
P05814	Beta-casein	85	103	L.AQPAVVLPVPQPEIMEVPK.A		19	2041.13	681.383	3	32.28	56.75	681.384	3	36.3		x
P05814	Beta-casein	85	111	L.AQPAVVLPVPQPEIMEVPKAKDTVYTK.G		27	2947.61	737.911	4	97.05	51.41	737.913	4	39.99		x
P05814	Beta-casein	86	103	A.QPAVVLPVPQPEIMEVPK.A		18	1970.09	657.705	3	89.83	56.62	657.707	3	57.65		x
P05814	Beta-casein	86	111	A.QPAVVLPVPQPEIMEVPKAKDTVYTK.G		26	2876.57	720.151	4	100.6	51.23	720.154	4	54.15		x
P05814	Beta-casein	88	110	P.AVVLPVPQPEIMEVPKAKDTVYT.K		23	2523.37	842.131	3	41.96	54.05	842.138	3	37.96		x
P05814	Beta-casein	88	111	P.AVVLPVPQPEIMEVPKAKDTVYTK.G		24	2651.46	663.873	4	98.62	50.32	663.873	4	52.37	x	x
P05814	Beta-casein	89	107	A.VVLPVPQPEIMEVPKAKDT.V		19	2089.15	697.391	3	60.82	50.29	697.39	3	31	x	x
P05814	Beta-casein	89	110	A.VVLPVPQPEIMEVPKAKDTVYT.K		22	2452.33	818.451	3	32.61	53.01	818.454	3	37.25		x
P05814	Beta-casein	89	111	A.VVLPVPQPEIMEVPKAKDTVYTK.G		23	2580.42	646.113	4	93.36	49.41	646.119	4	51.7		x
P05814	Beta-casein	90	110	V.VLPVPQPEIMEVPKAKDTVYT.K		21	2353.26	785.428	3	34.05	49.94	785.433	3	27.41		x
P05814	Beta-casein	91	103	V.LPVPQPEIMEVPK.A		13	1475.81	738.911	2	26.9	56.71	738.913	2	48.35		x
P05814	Beta-casein	92	111	L.PVPQPEIMEVPKAKDTVYTK.G		20	2269.2	757.41	3	51.92	75.23	1135.62	2	32.16		x
P05814	Beta-casein	97	111	P.EIMEVPKAKDTVYTK.G		15	1750.92	438.736	4	84.98	32.01	438.737	4	28.12		x
P05814	Beta-casein	100	110	M.EVPKAKDTVYT.K		11	1249.66	417.559	3	63.3	22.77	625.838	2	26.97	x	x
P05814	Beta-casein	101	110	E.VPKAKDTVYT.K		10	1120.61	561.313	2	26.28	20.17	561.317	2	41.46	x	x
P05814	Beta-casein	104	118	K.AKDTVYTKGRVM(+15.99)PVL.K	Oxidation (M)	15	1692.92	424.238	4	89.92	31.02	565.316	3	26.94	x	x
P05814	Beta-casein	104	118	K.AKDTVYTKGRVMPVL.K		15	1676.93	420.24	4	86.38	36.74	559.987	3	45.86	x	x
P05814	Beta-casein	104	119	K.AKDTVYTKGRVM(+15.99)PVLK.S	Oxidation (M)	16	1821.02	456.261	4	93.7	25.86	456.263	4	42.87	x	x
P05814	Beta-casein	104	119	K.AKDTVYTKGRVMPVLK.S		16	1805.02	602.682	3	100.78	30.49	452.269	4	46.51	x	x
P05814	Beta-casein	104	131	K.AKDTVYTKGRVMPVLKSPTIPFFDPQIP.K		28	3144.7	629.948	5	45.89	58.72	787.187	4	38.98		x
P05814	Beta-casein	104	132	K.AKDTVYTKGRVMPVLKSPTIPFFDPQIPK.L		29	3272.8	819.208	4	89.26	54.17	655.571	5	44.46		x
P05814	Beta-casein	105	118	A.KDTVYTKGRVMPVL.K		14	1605.89	536.304	3	68.6	36.52	536.307	3	42.08		x
P05814	Beta-casein	105	119	A.KDTVYTKGRVM(+15.99)PVLK.S	Oxidation (M)	15	1749.98	438.503	4	89.09	25.45	438.51	4	31.33	x	x
P05814	Beta-casein	105	119	A.KDTVYTKGRVMPVLK.S		15	1733.99	434.504	4	92.86	30.19	579.006	3	44.95	x	x
P05814	Beta-casein	106	118	K.DTVYTKGRVM(+15.99)PVL.K	Oxidation (M)	13	1493.79	498.937	3	51.22	35.25	498.936	3	36.46		x
P05814	Beta-casein	106	118	K.DTVYTKGRVMPVL.K		13	1477.8	493.606	3	55.32	41.68	493.605	3	40.78		x
P05814	Beta-casein	106	119	K.DTVYTKGRVM(+15.99)PVLK.S	Oxidation (M)	14	1621.89	406.479	4	88.58	28.95	541.645	3	38.52	x	x
P05814	Beta-casein	106	119	K.DTVYTKGRVMPVLK.S		14	1605.89	402.481	4	91.19	34.16	803.956	2	49.66	x	x
P05814	Beta-casein	106	131	K.DTVYTKGRVMPVLKSPTIPFFDPQIP.K		26	2945.57	737.402	4	21.43	62.54	737.401	4	31.34		x
P05814	Beta-casein	106	132	K.DTVYTKGRVM(+15.99)PVLKSPTIPFFDPQIPK.L	Oxidation (M)	27	3089.66	773.423	4	76.03	54.59	618.943	5	32.17		x
P05814	Beta-casein	106	132	K.DTVYTKGRVMPVLKSPTIPFFDPQIPK.L		27	3073.67	769.425	4	73.28	57.47	769.43	4	54.16		x
P05814	Beta-casein	109	119	V.YTKGRVMPVLK.S		11	1290.75	431.256	3	52.45	30.47	646.385	2	42.68		x
P05814	Beta-casein	112	119	K.GRVMPVLK.S		8	898.542	450.278	2	28.28	26.88	450.28	2	35.91	x	x
P05814	Beta-casein	112	127	K.GRVMPVLKSPTIPFFD.P		16	1802.98	601.999	3	48.96	58.69	602.004	3	37.49		x
P05814	Beta-casein	112	132	K.GRVM(+15.99)PVLKSPTIPFFDPQIPK.L	Oxidation (M)	21	2382.31	795.113	3	55	54.9	596.596	4	51.55	x	x
P05814	Beta-casein	112	132	K.GRVMPVLKSPTIPFFDPQIPK.L		21	2366.32	592.587	4	69.75	57.62	789.783	3	54.17	x	x
P05814	Beta-casein	113	131	G.RVMPVLKSPTIPFFDPQIP.K		19	2181.2	728.076	3	23.73	63.04	728.081	3	35.79		x
P05814	Beta-casein	114	132	R.VM(+15.99)PVLKSPTIPFFDPQIPK.L	Oxidation (M)	19	2169.19	724.072	3	64.83	58.39	724.074	3	34.04		x
P05814	Beta-casein	114	132	R.VMPVLKSPTIPFFDPQIPK.L		19	2153.2	718.74	3	53.33	61.5	718.741	3	46.86	x	x
P05814	Beta-casein	115	124	V.MPVLKSPTIP.F		10	1081.62	541.818	2	21.68	44.12	541.817	2	29.57		x
P05814	Beta-casein	115	127	V.MPVLKSPTIPFFD.P		13	1490.78	746.401	2	21.04	61.99	746.403	2	45.95		x
P05814	Beta-casein	115	131	V.M(+15.99)PVLKSPTIPFFDPQIP.K	Oxidation (M)	17	1942.03	648.351	3	45.83	64.02	972.025	2	49.84	x	x
P05814	Beta-casein	115	131	V.MPVLKSPTIPFFDPQIP.K		17	1926.03	643.019	3	43.21	66.83	964.032	2	41.89	x	x
P05814	Beta-casein	115	132	V.MPVLKSPTIPFFDPQIPK.L		18	2054.13	685.717	3	57.97	60.25	685.722	3	50.21	x	x
P05814	Beta-casein	120	132	K.SPTIPFFDPQIPK.L		13	1485.79	496.269	3	35.94	57.26	743.908	2	49.83	x	x
P05814	Beta-casein	124	132	I.PFFDPQIPK.L		9	1087.57	544.793	2	32.2	57.52	544.8	2	36.05	x	x
P05814	Beta-casein	127	144	F.DPQIPKLTDLENLHLPLP.L		18	2052.13	685.05	3	44.84	68.15	685.051	3	50.58	x	x
P05814	Beta-casein	176	189	K.VLPIPQQVVPYPQR.A		14	1632.94	545.319	3	60.62	48.33	817.481	2	51.43	x	x
P05814	Beta-casein	176	194	K.VLPIPQQVVPYPQRAVPVQ.A		19	2127.22	710.082	3	47.02	51.83	710.081	3	42.83		x
P05814	Beta-casein	176	195	K.VLPIPQQVVPYPQRAVPVQA.L		20	2198.26	733.761	3	73.07	52.63	1100.14	2	48.22	x	x
P05814	Beta-casein	177	195	V.LPIPQQVVPYPQRAVPVQA.L		19	2099.19	700.738	3	64.35	50.4	700.744	3	43.61	x	x
P05814	Beta-casein	190	221	R.AVPVQALLLNQELLLNPTHQIYPVTQPLAPVH.N		32	3525.97	882.501	4	37.96	69.41	882.505	4	43.57		x
P05814	Beta-casein	191	226	A.VPVQALLLNQELLLNPTHQIYPVTQPLAPVHNPISV		36	3965.21	794.052	5	38.55	69.98	1322.75	3	57.22	x	x
P05814	Beta-casein	195	226	Q.ALLLNQELLLNPTHQIYPVTQPLAPVHNPISV		32	3541.97	886.5	4	37.26	66.32	1181.67	3	56.29	x	x
P05814	Beta-casein	196	226	A.LLLNQELLLNPTHQIYPVTQPLAPVHNPISV		31	3470.93	868.742	4	41.52	65.49	1157.99	3	44.86	x	x
P05814	Beta-casein	198	226	L.LNQELLLNPTHQIYPVTQPLAPVHNPISV		29	3244.76	812.198	4	49.16	59.7	1082.6	3	48.11	x	x
P05814	Beta-casein	200	226	N.QELLLNPTHQIYPVTQPLAPVHNPISV		27	3017.63	755.416	4	67.14	58.34	1006.89	3	51.17	x	x
P05814	Beta-casein	202	226	E.LLLNPTHQIYPVTQPLAPVHNPISV		25	2760.53	691.143	4	42.83	57.19	921.191	3	51.49	x	x
P05814	Beta-casein	205	226	L.NPTHQIYPVTQPLAPVHNPISV		22	2421.28	808.102	3	38.38	49	808.112	3	48.34	x	x
P05814	Beta-casein	206	226	N.PTHQIYPVTQPLAPVHNPISV		21	2307.24	770.088	3	32.13	48.87	770.096	3	56.61	x	x
P05814	Beta-casein	207	226	P.THQIYPVTQPLAPVHNPISV		20	2210.18	737.736	3	47.46	48.67	737.74	3	51.87	x	x
P05814	Beta-casein	211	226	I.YPVTQPLAPVHNPISV		16	1730.94	577.986	3	46.67	48.65	866.477	2	58.51	x	x
P05814	Beta-casein	215	226	T.QPLAPVHNPISV		12	1270.7	636.36	2	32.64	41.87	636.366	2	51.39	x	x
P05814	Beta-casein	216	226	Q.PLAPVHNPISV		11	1142.64	572.33	2	19.73	41.48	572.332	2	51.23	x	x
P05814	Beta-casein	218	226	L.APVHNPISV		9	932.508	467.261	2	23.88	33.07	467.271	2	42.47	x	x
P19835	Bile salt-activated lipase	21	38	A.AKLGAVYTEGGFVEGVNK.K		18	1837.96	613.66	3	123.93	40.2	613.666	3	53.14		x
P19835	Bile salt-activated lipase	21	39	A.AKLGAVYTEGGFVEGVNKK.L		19	1966.05	492.52	4	126.83	37.42	656.357	3	49.11		x
P19835	Bile salt-activated lipase	21	51	A.AKLGAVYTEGGFVEGVNKKLGLLGDSVDIFK.G		31	3223.75	806.946	4	103.42	63.66	806.949	4	65.45		x
P19835	Bile salt-activated lipase	22	39	A.KLGAVYTEGGFVEGVNKK.L		18	1895.02	632.679	3	95.25	36.31	632.68	3	50.5	x	x
P19835	Bile salt-activated lipase	22	51	A.KLGAVYTEGGFVEGVNKKLGLLGDSVDIFK.G		30	3152.71	789.186	4	97.43	63.4	789.192	4	66.87		x
P19835	Bile salt-activated lipase	23	51	K.LGAVYTEGGFVEGVNKKLGLLGDSVDIFK.G		29	3024.62	757.163	4	92.63	66.19	757.17	4	55.8		x
P19835	Bile salt-activated lipase	24	39	L.GAVYTEGGFVEGVNKK.L		16	1653.84	552.285	3	58.17	34.43	552.288	3	43.03		x
P19835	Bile salt-activated lipase	24	51	L.GAVYTEGGFVEGVNKKLGLLGDSVDIFK.G		28	2911.53	728.891	4	80.98	64.68	728.892	4	38.97		x
P19835	Bile salt-activated lipase	28	39	Y.TEGGFVEGVNKK.L		12	1263.65	422.222	3	78.15	23.75	422.222	3	39.63	x	x
P19835	Bile salt-activated lipase	29	38	T.EGGFVEGVNK.K		10	1034.5	518.259	2	50.17	26.68	518.26	2	42.2		x
P19835	Bile salt-activated lipase	40	76	K.LGLLGDSVDIFKGIPFAAPTKALENPQPHPGWQGTLK.A		37	3912.09	783.427	5	50.7	66.59	783.431	5	36.72		x
P19835	Bile salt-activated lipase	41	76	L.GLLGDSVDIFKGIPFAAPTKALENPQPHPGWQGTLK.A		36	3799.01	760.811	5	38.5	64.54	760.814	5	31.55		x
P19835	Bile salt-activated lipase	45	51	G.DSVDIFK.G		7	822.412	412.213	2	30.73	37.21	412.213	2	32.9		x
P19835	Bile salt-activated lipase	52	76	K.GIPFAAPTKALENPQPHPGWQGTLK.A		25	2654.4	664.607	4	77.66	47.3	664.611	4	37.86	x	x
P19835	Bile salt-activated lipase	57	76	A.APTKALENPQPHPGWQGTLK.A		20	2169.13	543.29	4	96.62	33.87	543.293	4	37.78		x
P19835	Bile salt-activated lipase	355	375	K.GNKKVTEEDFYKLVSEFTITK.G		21	2475.29	619.83	4	105.7	59.52	619.836	4	52.38		x
P19835	Bile salt-activated lipase	355	378	K.GNKKVTEEDFYKLVSEFTITKGLR.G		24	2801.5	561.306	5	103.47	59.98	561.308	5	54.7		x
P19835	Bile salt-activated lipase	355	380	K.GNKKVTEEDFYKLVSEFTITKGLRGA.K		26	2929.55	586.918	5	36.93	60.39	586.929	5	45.52		x
P19835	Bile salt-activated lipase	356	378	G.NKKVTEEDFYKLVSEFTITKGLR.G		23	2744.47	549.903	5	71.71	60.11	549.906	5	43.28		x
P19835	Bile salt-activated lipase	401	428	K.KKTVVDFETDVLFLVPTEIALAQHRANA.K		28	3124.69	782.181	4	70.33	69.25	782.181	4	36.45		x
Q13410	Butyrophilin subfamily 1 member A1	68	91	R.KKVSPAVLVHRDGREQEAEQMPEY.R		24	2795.4	560.088	5	66.04	32.94	560.088	5	28.05	x	x
Q13410	Butyrophilin subfamily 1 member A1	68	92	R.KKVSPAVLVHRDGREQEAEQM(+15.99)PEYR.G	Oxidation (M)	25	2967.5	594.507	5	77.88	27.13	594.517	5	39.45	x	x
Q13410	Butyrophilin subfamily 1 member A1	68	92	R.KKVSPAVLVHRDGREQEAEQMPEYR.G		25	2951.5	591.309	5	89.53	31.07	591.311	5	46.7	x	x
Q13410	Butyrophilin subfamily 1 member A1	69	91	K.KVSPAVLVHRDGREQEAEQMPEY.R		23	2667.31	667.834	4	60.57	35.74	667.838	4	28.63	x	x
Q13410	Butyrophilin subfamily 1 member A1	69	92	K.KVSPAVLVHRDGREQEAEQM(+15.99)PEYR.G	Oxidation (M)	24	2839.4	568.888	5	84	28.97	568.893	5	37.54	x	x
Q13410	Butyrophilin subfamily 1 member A1	69	92	K.KVSPAVLVHRDGREQEAEQMPEYR.G		24	2823.41	706.862	4	85.04	33.27	565.692	5	45.65	x	x
Q13410	Butyrophilin subfamily 1 member A1	71	91	V.SPAVLVHRDGREQEAEQMPEY.R		21	2440.14	611.043	4	63.18	35.19	814.392	3	24	x	x
Q13410	Butyrophilin subfamily 1 member A1	71	92	V.SPAVLVHRDGREQEAEQM(+15.99)PEYR.G	Oxidation (M)	22	2612.24	654.067	4	85.08	27.4	654.069	4	32.62	x	x
Q13410	Butyrophilin subfamily 1 member A1	71	92	V.SPAVLVHRDGREQEAEQMPEYR.G		22	2596.25	650.068	4	96.94	32.21	650.074	4	55.61	x	x
Q13410	Butyrophilin subfamily 1 member A1	71	93	V.SPAVLVHRDGREQEAEQMPEYRG.R		23	2653.27	664.324	4	95.42	32.55	664.329	4	29.05		x
Q13410	Butyrophilin subfamily 1 member A1	79	92	R.DGREQEAEQM(+15.99)PEYR.G	Oxidation (M)	14	1752.74	585.253	3	84.2	21.88	585.261	3	41.45	x	x
Q13410	Butyrophilin subfamily 1 member A1	79	92	R.DGREQEAEQMPEYR.G		14	1736.74	579.922	3	86.94	28.26	579.929	3	48.21	x	x
Q13410	Butyrophilin subfamily 1 member A1	79	93	R.DGREQEAEQM(+15.99)PEYRG.R	Oxidation (M)	15	1809.76	604.26	3	81.38	22.46	604.266	3	39.03	x	x
Q13410	Butyrophilin subfamily 1 member A1	79	93	R.DGREQEAEQMPEYRG.R		15	1793.76	598.928	3	93.27	28.97	598.93	3	46.19	x	x
Q13410	Butyrophilin subfamily 1 member A1	79	94	R.DGREQEAEQM(+15.99)PEYRGR.A	Oxidation (M)	16	1965.86	492.472	4	92.12	20.47	492.474	4	33.47	x	x
Q13410	Butyrophilin subfamily 1 member A1	79	94	R.DGREQEAEQMPEYRGR.A		16	1949.87	488.473	4	92.08	26.44	650.967	3	46.57	x	x
Q13410	Butyrophilin subfamily 1 member A1	79	106	R.DGREQEAEQM(+15.99)PEYRGRATLVQDGIAKGR.V	Oxidation (M)	28	3175.54	636.116	5	74.61	31.84	636.122	5	40.41	x	x
Q13410	Butyrophilin subfamily 1 member A1	79	106	R.DGREQEAEQMPEYRGRATLVQDGIAKGR.V		28	3159.55	632.917	5	87.76	35.88	632.924	5	48.88	x	x
Q13410	Butyrophilin subfamily 1 member A1	80	92	D.GREQEAEQM(+15.99)PEYR.G	Oxidation (M)	13	1637.71	546.91	3	77.18	20.41	546.913	3	37.2	x	x
Q13410	Butyrophilin subfamily 1 member A1	80	92	D.GREQEAEQMPEYR.G		13	1621.72	541.579	3	86.04	26.62	541.585	3	40.09	x	x
Q13410	Butyrophilin subfamily 1 member A1	93	104	R.GRATLVQDGIAK.G		12	1227.69	410.238	3	57.53	26.27	614.856	2	36.98	x	x
Q13410	Butyrophilin subfamily 1 member A1	93	106	R.GRATLVQDGIAKGR.V		14	1440.82	481.279	3	72.68	25.12	481.282	3	24.29	x	x
Q13410	Butyrophilin subfamily 1 member A1	93	108	R.GRATLVQDGIAKGRVA.L		16	1610.92	537.981	3	90.84	30.58	537.98	3	39.87	x	x
Q13410	Butyrophilin subfamily 1 member A1	95	104	R.ATLVQDGIAK.G		10	1014.57	508.292	2	44.43	28.95	508.293	2	38.62	x	x
Q13410	Butyrophilin subfamily 1 member A1	96	104	A.TLVQDGIAK.G		9	943.534	472.774	2	29.99	27.45	472.778	2	42.08	x	x
Q13410	Butyrophilin subfamily 1 member A1	179	209	R.TSKGEKFPSTSESRNPDEEGLFTVAASVIIR.D		31	3351.69	838.932	4	55.95	57.46	671.353	5	35.5	x	x
Q13410	Butyrophilin subfamily 1 member A1	230	249	K.KVEISIPASSLPRLTPWIVA.V		20	2176.26	726.429	3	62.81	64.35	726.432	3	34.79	x	x
Q13410	Butyrophilin subfamily 1 member A1	235	247	S.IPASSLPRLTPWI.V		13	1449.83	725.925	2	34.5	61.3	725.93	2	48.22	x	x
Q13410	Butyrophilin subfamily 1 member A1	235	248	S.IPASSLPRLTPWIV.A		14	1548.9	775.46	2	27.45	62.99	775.463	2	48.35	x	x
Q13410	Butyrophilin subfamily 1 member A1	235	249	S.IPASSLPRLTPWIVA.V		15	1619.94	540.987	3	45.27	61.77	810.982	2	52.56	x	x
Q13410	Butyrophilin subfamily 1 member A1	235	251	S.IPASSLPRLTPWIVAVA.V		17	1790.05	896.032	2	25.65	65.55	896.033	2	51.94	x	x
Q13410	Butyrophilin subfamily 1 member A1	302	317	H.AVDVTLDPDTAHPHLF.L		16	1746.86	583.293	3	57.57	49.25	583.298	3	43.83	x	x
Q13410	Butyrophilin subfamily 1 member A1	313	323	A.HPHLFLYEDSK.S		11	1384.68	462.566	3	55.98	35.19	462.566	3	32.81	x
Q13410	Butyrophilin subfamily 1 member A1	489	526	A.QDLSKEIPLSPM(+15.99)GEDSAPRDADTLHSKLIPTQPSQGAP	Oxidation (M)	38	4042	809.407	5	38.85	46.65	809.413	5	26.57	x
Q13410	Butyrophilin subfamily 1 member A1	493	507	S.KEIPLSPM(+15.99)GEDSAPR.D	Oxidation (M)	15	1641.8	548.274	3	51.57	28.62	548.276	3	43.56	x
Q13410	Butyrophilin subfamily 1 member A1	493	507	S.KEIPLSPMGEDSAPR.D		15	1625.81	542.943	3	84.6	34.1	542.948	3	52.43	x	x
Q13410	Butyrophilin subfamily 1 member A1	493	513	S.KEIPLSPM(+15.99)GEDSAPRDADTLH.S	Oxidation (M)	21	2294.08	574.529	4	105.54	32.52	765.707	3	41.73	x	x
Q13410	Butyrophilin subfamily 1 member A1	493	513	S.KEIPLSPMGEDSAPRDADTLH.S		21	2278.09	570.53	4	110.84	36.99	760.378	3	58.08	x	x
Q13410	Butyrophilin subfamily 1 member A1	493	515	S.KEIPLSPMGEDSAPRDADTLHSK.L		23	2493.22	624.311	4	104.09	33.96	624.315	4	40.36	x	x
Q13410	Butyrophilin subfamily 1 member A1	493	522	S.KEIPLSPMGEDSAPRDADTLHSKLIPTQPS.Q		30	3229.63	808.416	4	64.51	44.18	808.414	4	37.54	x
Q13410	Butyrophilin subfamily 1 member A1	493	523	S.KEIPLSPMGEDSAPRDADTLHSKLIPTQPSQ.G		31	3357.69	840.429	4	44.27	43.95	840.43	4	35.69	x
Q13410	Butyrophilin subfamily 1 member A1	493	526	S.KEIPLSPM(+15.99)GEDSAPRDADTLHSKLIPTQPSQGAP	Oxidation (M)	34	3598.79	720.767	5	33.98	41.58	900.715	4	43.12	x	x
Q13410	Butyrophilin subfamily 1 member A1	493	526	S.KEIPLSPMGEDSAPRDADTLHSKLIPTQPSQGAP		34	3582.8	717.569	5	57.62	44.5	896.715	4	44.31	x	x
Q13410	Butyrophilin subfamily 1 member A1	494	513	K.EIPLSPM(+15.99)GEDSAPRDADTLH.S	Oxidation (M)	20	2165.99	723.005	3	90.71	36.48	723.005	3	39.72	x	x
Q13410	Butyrophilin subfamily 1 member A1	494	513	K.EIPLSPMGEDSAPRDADTLH.S		20	2149.99	717.674	3	56.61	41.44	717.675	3	40.57	x	x
Q13410	Butyrophilin subfamily 1 member A1	494	526	K.EIPLSPMGEDSAPRDADTLHSKLIPTQPSQGAP		33	3454.7	864.684	4	21.4	48.1	864.684	4	25.49	x	x
Q13410	Butyrophilin subfamily 1 member A1	495	513	E.IPLSPM(+15.99)GEDSAPRDADTLH.S	Oxidation (M)	19	2036.95	679.99	3	97.26	34.21	679.993	3	38.34	x	x
Q13410	Butyrophilin subfamily 1 member A1	499	513	S.PMGEDSAPRDADTLH.S		15	1610.7	537.906	3	64.04	36.98	537.909	3	33.19	x	x
Q13410	Butyrophilin subfamily 1 member A1	504	526	D.SAPRDADTLHSKLIPTQPSQGAP		23	2386.22	597.564	4	92.24	35.9	597.57	4	30.74	x	x
Q13410	Butyrophilin subfamily 1 member A1	505	526	S.APRDADTLHSKLIPTQPSQGAP		22	2299.19	575.805	4	96.7	35.74	575.81	4	36.12	x	x
Q13410	Butyrophilin subfamily 1 member A1	507	518	P.RDADTLHSKLIP.T		12	1364.74	455.921	3	69.1	33.2	455.923	3	33.96	x	x
Q13410	Butyrophilin subfamily 1 member A1	508	518	R.DADTLHSKLIP.T		11	1208.64	403.885	3	74.74	37.7	605.332	2	33.13	x	x
Q13410	Butyrophilin subfamily 1 member A1	514	524	H.SKLIPTQPSQG.A		11	1154.63	578.322	2	19.86	27.81	578.326	2	43.85	x	x
Q9BW60	Elongation of very long chain fatty acids protein 1	264	279	R.ALQQNGAPGIAKVKAN		16	1578.88	527.301	3	46.29	26.81	527.308	3	38.56	x	x
Q14512	Fibroblast growth factor-binding protein 1	29	51	K.NGLHSKVVSEQKDTLGNTQIKQK.S		23	2551.37	511.281	5	98.04	26.41	638.854	4	44.89	x	x
Q14512	Fibroblast growth factor-binding protein 1	33	51	H.SKVVSEQKDTLGNTQIKQK.S		19	2130.16	533.548	4	90.11	22.53	533.553	4	35.22	x
Q92896	Golgi apparatus protein 1	28	45	A.EKLPGQGVHSQGQGPGAN.F		18	1759.86	587.627	3	35.19	22.3	587.631	3	43.36	x	x
P15941	Mucin-1	1223	1242	S.STDRSPYEKVSAGNGGSSLS.Y		20	1997.93	666.984	3	21.31	27.63	666.985	3	34.53	x	x
P15941	Mucin-1	1224	1242	S.TDRSPYEKVSAGNGGSSLS.Y		19	1910.9	637.973	3	28.84	27.61	637.974	3	46.49	x	x
P15941	Mucin-1	1224	1243	S.TDRSPYEKVSAGNGGSSLSY.T		20	2073.96	692.328	3	36.82	33.62	692.334	3	54.16	x	x
P15941	Mucin-1	1225	1242	T.DRSPYEKVSAGNGGSSLS.Y		18	1809.85	604.29	3	26.04	27.98	604.293	3	34.98	x	x
P15941	Mucin-1	1225	1243	T.DRSPYEKVSAGNGGSSLSY.T		19	1972.91	658.645	3	28.9	34.29	658.645	3	43.19	x	x
P15941	Mucin-1	1244	1255	Y.TNPAVAATSANL		12	1128.58	565.296	2	21.95	36.03	565.3	2	52.43	x	x
P15941	Mucin-1	1245	1255	T.NPAVAATSANL		11	1027.53	514.771	2	27.8	33.24	514.775	2	48.55	x	x
P10451	Osteopontin	169	192	R.SKSKKFRRPDIQYPDATDEDITSH.M		24	2833.4	709.358	4	58.72	32.56	709.358	4	37.23	x	x
P10451	Osteopontin	169	203	R.SKSKKFRRPDIQYPDAT(+79.97)DEDITSHMES(+79.97)EELNGAYK.A	Phosphorylation (STY)	35	4244.88	708.487	6	26.49	43.31	849.986	5	34.89		x
P10451	Osteopontin	169	203	R.SKSKKFRRPDIQYPDATDEDIT(+79.97)SHM(+15.99)ES(+79.97)EELNGAYK.A	Phosphorylation (STY); Oxidation (M)	35	4260.87	853.182	5	31.1	38.29	853.183	5	26.95		x
P10451	Osteopontin	169	203	R.SKSKKFRRPDIQYPDATDEDITSHM(+15.99)ES(+79.97)EELNGAYK.A	Oxidation (M); Phosphorylation (STY)	35	4180.9	837.19	5	64.89	38.05	837.194	5	30.54	x	x
P10451	Osteopontin	169	203	R.SKSKKFRRPDIQYPDATDEDITSHM(+15.99)ESEELNGAYK.A	Oxidation (M)	35	4100.94	821.196	5	81.99	37.54	821.203	5	34.12	x	x
P10451	Osteopontin	169	203	R.SKSKKFRRPDIQYPDATDEDITSHMES(+79.97)EELNGAYK.A	Phosphorylation (STY)	35	4164.91	833.991	5	52.97	42.61	833.994	5	38.36	x	x
P10451	Osteopontin	169	203	R.SKSKKFRRPDIQYPDATDEDITSHMESEELNGAYK.A		35	4084.94	817.998	5	70.61	41.99	817.999	5	37.18	x	x
P10451	Osteopontin	171	203	K.SKKFRRPDIQYPDATDEDITSHM(+15.99)ES(+79.97)EELNGAYK.A	Oxidation (M); Phosphorylation (STY)	33	3965.78	794.164	5	57.99	39.35	794.162	5	25.22		x
P10451	Osteopontin	171	203	K.SKKFRRPDIQYPDATDEDITSHMES(+79.97)EELNGAYK.A	Phosphorylation (STY)	33	3949.78	790.965	5	41.82	43.58	790.969	5	28.09		x
P10451	Osteopontin	174	203	K.FRRPDIQYPDATDEDITSHMES(+79.97)EELNGAYK.A	Phosphorylation (STY)	30	3606.56	902.648	4	29.43	47.89	902.652	4	40.9	x	x
P10451	Osteopontin	174	203	K.FRRPDIQYPDATDEDITSHMESEELNGAYK.A		30	3526.59	706.327	5	76.54	46.46	706.327	5	36.47	x	x
P10451	Osteopontin	175	192	F.RRPDIQYPDATDEDITSH.M		18	2127.98	710.335	3	27.12	33.3	710.341	3	37.98	x
P10451	Osteopontin	175	203	F.RRPDIQYPDATDEDITSHM(+15.99)ES(+79.97)EELNGAYK.A	Oxidation (M); Phosphorylation (STY)	29	3475.49	869.88	4	48.09	39.79	869.883	4	33.81	x	x
P10451	Osteopontin	175	203	F.RRPDIQYPDATDEDITSHM(+15.99)ESEELNGAYK.A	Oxidation (M)	29	3395.52	849.889	4	54.04	38.68	849.899	4	27.59	x	x
P10451	Osteopontin	175	203	F.RRPDIQYPDATDEDITSHMES(+79.97)EELNGAYK.A	Phosphorylation (STY)	29	3459.49	865.884	4	34.84	45.26	865.885	4	42.91	x	x
P10451	Osteopontin	175	203	F.RRPDIQYPDATDEDITSHMESEELNGAYK.A		29	3379.53	845.889	4	73.68	43.77	845.887	4	40.97	x	x
P10451	Osteopontin	176	192	R.RPDIQYPDATDEDITSH.M		17	1971.88	658.301	3	106.95	35.71	658.307	3	52.54	x	x
P10451	Osteopontin	176	203	R.RPDIQYPDATDEDITSHMES(+79.97)EELNGAYK.A	Phosphorylation (STY)	28	3303.39	826.856	4	73.98	47.6	1102.14	3	55.09	x	x
P10451	Osteopontin	176	203	R.RPDIQYPDATDEDITSHMESEELNGAYK.A		28	3223.43	806.865	4	95.29	45.83	806.864	4	57.61	x	x
P10451	Osteopontin	225	246	S.YETSQLDDQS(+79.97)AETHSHKQSRLY.K	Phosphorylation (STY)	22	2702.16	676.548	4	56.12	29.89	676.547	4	26.86	x	x
P10451	Osteopontin	274	290	F.HS(+79.97)HEFHS(+79.97)HEDMLVVDPK.S	Phosphorylation (STY)	17	2202.86	551.722	4	71.88	33.23	551.724	4	27.8	x
P12272	Parathyroid hormone-related protein	37	55	R.AVSEHQLLHDKGKSIQDLR.R		19	2173.16	435.639	5	92.76	31.17	544.304	4	53.08	x	x
P12272	Parathyroid hormone-related protein	39	55	V.SEHQLLHDKGKSIQDLR.R		17	2003.05	501.77	4	99.81	27.82	501.772	4	52.25	x	x
P12272	Parathyroid hormone-related protein	40	55	S.EHQLLHDKGKSIQDLR.R		16	1916.02	480.012	4	91.31	27.43	480.014	4	50.24	x	x
Q99541	Perilipin-2	24	44	S.STYDLMSSAYLSTKDQYPYLK.S		21	2473.17	825.398	3	22.23	53.65	825.401	3	38.06	x
Q99541	Perilipin-2	30	44	M.SSAYLSTKDQYPYLK.S		15	1762.88	882.446	2	30.34	38.2	588.637	3	45.39	x
Q99541	Perilipin-2	31	44	S.SAYLSTKDQYPYLK.S		14	1675.85	559.622	3	83.88	38.13	559.629	3	48.96	x	x
Q99541	Perilipin-2	33	44	A.YLSTKDQYPYLK.S		12	1517.78	506.932	3	68.13	35.59	506.933	3	40.63	x	x
Q99541	Perilipin-2	65	77	S.ALPIIQKLEPQIA.V		13	1432.87	478.629	3	42.25	55.79	717.444	2	49.7	x	x
Q99541	Perilipin-2	66	77	A.LPIIQKLEPQIA.V		12	1361.83	681.921	2	26.91	51.75	681.927	2	45.95	x	x
Q99541	Perilipin-2	114	124	T.GAKDAVTTTVT.G		11	1062.56	532.285	2	33.22	22.36	532.285	2	38.04	x
Q99541	Perilipin-2	174	182	S.SGVENALTK.S		9	917.482	459.748	2	28.8	23.39	459.745	2	34.85	x
Q99541	Perilipin-2	174	186	S.SGVENALTKSELL.V		13	1359.72	680.87	2	24.47	45.95	680.875	2	47.45	x
Q99541	Perilipin-2	174	190	S.SGVENALTKSELLVEQY.L		17	1878.96	940.488	2	19.99	55.15	940.492	2	49.86	x
Q99541	Perilipin-2	191	211	Y.LPLTEEELEKEAKKVEGFDLV.Q		21	2415.28	604.827	4	90.5	60.5	806.107	3	47.21	x	x
Q99541	Perilipin-2	195	211	T.EEELEKEAKKVEGFDLV.Q		17	1991.01	664.677	3	55.69	49.62	664.682	3	31.76	x	x
Q99541	Perilipin-2	196	211	E.EELEKEAKKVEGFDLV.Q		16	1861.97	466.499	4	89.06	45.73	621.671	3	46.18	x	x
Q99541	Perilipin-2	196	212	E.EELEKEAKKVEGFDLVQ.K		17	1990.03	664.35	3	47.36	43.88	664.359	3	37.41	x	x
Q99541	Perilipin-2	196	221	E.EELEKEAKKVEGFDLVQKPSYYVRLG.S		26	3053.61	611.729	5	92.42	49.74	611.731	5	24.22	x	x
Q99541	Perilipin-2	211	221	L.VQKPSYYVRLG.S		11	1308.72	437.246	3	47.67	35.4	437.248	3	33.51	x
Q99541	Perilipin-2	212	221	V.QKPSYYVRLG.S		10	1209.65	404.224	3	62.17	32.97	404.226	3	39.18	x	x
Q99541	Perilipin-2	213	221	Q.KPSYYVRLG.S		9	1081.59	541.803	2	32.62	31.79	541.807	2	36.32	x	x
Q99541	Perilipin-2	222	237	G.SLSTKLHSRAYQQALS.R		16	1788.95	448.244	4	101.29	30.94	597.33	3	27.84	x	x
O60664	Perilipin-3	44	57	S.AAYASTKESYPHIK.T		14	1564.79	522.602	3	54.05	26.13	392.211	4	33.26	x
O60664	Perilipin-3	95	118	E.YAHRGLDKLEENLPILQQPTEKVL.A		24	2803.52	701.888	4	33.05	53.34	701.89	4	24.78	x
O60664	Perilipin-3	111	126	L.QQPTEKVLADTKELVS.S		16	1784.95	595.991	3	53.21	41.83	595.998	3	28.44	x
O60664	Perilipin-3	116	130	E.KVLADTKELVSSKVS.G		15	1602.92	535.314	3	87.63	31.86	535.313	3	43.59	x
O60664	Perilipin-3	116	133	E.KVLADTKELVSSKVSGAQ.E		18	1859.04	620.686	3	83.92	33.32	620.692	3	37.18	x
O60664	Perilipin-3	119	133	L.ADTKELVSSKVSGAQ.E		15	1518.79	507.269	3	77.27	26.57	507.271	3	39.82	x
O60664	Perilipin-3	119	134	L.ADTKELVSSKVSGAQE.M		16	1647.83	550.284	3	66.07	27.54	550.284	3	30.31	x
O60664	Perilipin-3	138	148	S.SAKDTVATQLS.E		11	1119.58	560.795	2	21.88	25.16	560.8	2	37.1	x
O60664	Perilipin-3	148	159	L.SEAVDATRGAVQ.S		12	1202.59	602.302	2	35.76	22.82	602.299	2	38.4	x
O60664	Perilipin-3	160	174	Q.SGVDKTKSVVTGGVQ.S		15	1460.78	487.935	3	49.8	24.98	487.943	3	35.57	x	x
O60664	Perilipin-3	307	328	Q.KQLQGPEKEPPKPEQVESRALT.M		22	2488.33	623.09	4	75.74	29.63	623.093	4	50.86	x	x
O60664	Perilipin-3	346	363	G.SSIQGLPTNVKDQVQQAR.R		18	1968.04	657.02	3	47.64	36.86	657.022	3	29.04	x
O60664	Perilipin-3	412	434	N.TPVTWLVGPFAPGITEKAPEEKK		23	2494.35	624.594	4	21.41	55.47	624.596	4	41.2	x
O60664	Perilipin-3	419	434	V.GPFAPGITEKAPEEKK		16	1697.9	566.973	3	29.59	29.74	425.481	4	39.03	x
O00592	Podocalyxin	545	558	N.LTKDDLDEEEDTHL		14	1671.75	558.256	3	103.02	34.75	558.258	3	33.83	x	x
P01833	Polymeric immunoglobulin receptor	572	597	R.DVSLAKADAAPDEKVLDSGFREIENK.A		26	2816.42	705.112	4	70.98	47.52	705.117	4	27.13	x
P01833	Polymeric immunoglobulin receptor	593	609	R.EIENKAIQDPRLFAEEK.A		17	2029.05	508.269	4	80.28	38.22	677.361	3	39.99	x	x
P01833	Polymeric immunoglobulin receptor	593	615	R.EIENKAIQDPRLFAEEKAVADTR.D		23	2642.37	661.6	4	73.83	41.02	661.605	4	43.96	x	x
P01833	Polymeric immunoglobulin receptor	598	609	K.AIQDPRLFAEEK.A		12	1415.74	472.92	3	61.33	36.53	472.92	3	30.91	x	x
P01833	Polymeric immunoglobulin receptor	598	615	K.AIQDPRLFAEEKAVADTR.D		18	2029.06	508.272	4	110.72	40.3	677.363	3	45.83	x	x
P01833	Polymeric immunoglobulin receptor	598	617	K.AIQDPRLFAEEKAVADTRDQ.A		20	2272.14	569.043	4	106.37	40.06	569.049	4	33.23	x	x
P01833	Polymeric immunoglobulin receptor	598	621	K.AIQDPRLFAEEKAVADTRDQADGS.R		24	2602.26	651.574	4	99.07	40.66	651.574	4	35.69	x	x
P01833	Polymeric immunoglobulin receptor	598	622	K.AIQDPRLFAEEKAVADTRDQADGSR.A		25	2758.36	552.681	5	97.29	39.18	690.608	4	40.78	x	x
P01833	Polymeric immunoglobulin receptor	598	638	K.AIQDPRLFAEEKAVADTRDQADGSRASVDSGSSEEQGGSSR.A		41	4279	856.809	5	51.25	38.73	856.81	5	37.03	x	x
P01833	Polymeric immunoglobulin receptor	598	639	K.AIQDPRLFAEEKAVADTRDQADGSRASVDSGSSEEQGGSSRA.L		42	4350.03	726.014	6	40.86	38.73	871.024	5	40.45	x	x
P01833	Polymeric immunoglobulin receptor	599	622	A.IQDPRLFAEEKAVADTRDQADGSR.A		24	2687.33	672.84	4	77.26	38.3	672.84	4	23.8	x	x
P01833	Polymeric immunoglobulin receptor	600	615	I.QDPRLFAEEKAVADTR.D		16	1844.94	462.241	4	91.57	36.22	615.987	3	42.87	x	x
P01833	Polymeric immunoglobulin receptor	601	615	Q.DPRLFAEEKAVADTR.D		15	1716.88	573.3	3	100.28	36.59	573.307	3	46.23	x	x
P01833	Polymeric immunoglobulin receptor	601	617	Q.DPRLFAEEKAVADTRDQ.A		17	1959.96	654.329	3	78.07	36.31	491.006	4	44.07	x	x
P01833	Polymeric immunoglobulin receptor	602	615	D.PRLFAEEKAVADTR.D		14	1601.85	534.957	3	101.93	40.25	534.964	3	37.6	x	x
P01833	Polymeric immunoglobulin receptor	602	622	D.PRLFAEEKAVADTRDQADGSR.A		21	2331.16	583.797	4	95.17	39.15	583.797	4	38.46	x	x
P01833	Polymeric immunoglobulin receptor	604	613	R.LFAEEKAVAD.T		10	1091.55	546.782	2	42.01	31.58	546.784	2	27.65	x	x
P01833	Polymeric immunoglobulin receptor	604	639	R.LFAEEKAVADTRDQADGSRASVDSGSSEEQGGSSRA.L		36	3669.67	734.943	5	42.88	32.57	734.941	5	31.38	x	x
P01833	Polymeric immunoglobulin receptor	605	619	L.FAEEKAVADTRDQAD.G		15	1664.76	555.928	3	45.85	25.86	555.933	3	33.27		x
P01833	Polymeric immunoglobulin receptor	605	622	L.FAEEKAVADTRDQADGSR.A		18	1964.92	492.236	4	114.14	25.84	655.989	3	44.06	x	x
P01833	Polymeric immunoglobulin receptor	605	638	L.FAEEKAVADTRDQADGSRASVDSGSSEEQGGSSR.A		34	3485.55	698.118	5	69.19	28.43	872.407	4	42.09	x	x
P01833	Polymeric immunoglobulin receptor	605	639	L.FAEEKAVADTRDQADGSRASVDSGSSEEQGGSSRA.L		35	3556.59	712.327	5	51.59	28.74	890.161	4	43.09	x	x
P01833	Polymeric immunoglobulin receptor	605	643	L.FAEEKAVADTRDQADGSRASVDSGSSEEQGGSSRALVST.L		39	3956.82	792.373	5	45.34	33.57	792.379	5	39.83	x	x
P01833	Polymeric immunoglobulin receptor	606	622	F.AEEKAVADTRDQADGSR.A		17	1817.85	455.469	4	95.86	17.75	455.47	4	37.19	x	x
P01833	Polymeric immunoglobulin receptor	606	639	F.AEEKAVADTRDQADGSRASVDSGSSEEQGGSSRA.L		34	3409.52	682.913	5	71.57	23.51	682.918	5	38.63	x	x
P01833	Polymeric immunoglobulin receptor	607	639	A.EEKAVADTRDQADGSRASVDSGSSEEQGGSSRA.L		33	3338.48	668.705	5	54.56	22.93	668.705	5	40.2	x	x
P01833	Polymeric immunoglobulin receptor	610	639	K.AVADTRDQADGSRASVDSGSSEEQGGSSRA.L		30	2952.3	739.086	4	91.66	21.77	739.094	4	47.55	x	x
P01833	Polymeric immunoglobulin receptor	610	640	K.AVADTRDQADGSRASVDSGSSEEQGGSSRAL.V		31	3065.39	767.355	4	56.7	26.4	767.362	4	32.03	x	x
P01833	Polymeric immunoglobulin receptor	610	643	K.AVADTRDQADGSRASVDSGSSEEQGGSSRALVST.L		34	3352.54	839.143	4	55.79	28.83	839.146	4	36.42	x	x
P01833	Polymeric immunoglobulin receptor	610	648	K.AVADTRDQADGSRASVDSGSSEEQGGSSRALVSTLVPLG.L		39	3831.85	767.377	5	26.76	47.87	958.979	4	32.92	x	x
P01833	Polymeric immunoglobulin receptor	611	638	A.VADTRDQADGSRASVDSGSSEEQGGSSR.A		28	2810.23	703.566	4	96.99	19.61	703.565	4	39.04	x	x
P01833	Polymeric immunoglobulin receptor	611	639	A.VADTRDQADGSRASVDSGSSEEQGGSSRA.L		29	2881.27	721.327	4	98.87	20.47	721.335	4	39.63	x	x
P01833	Polymeric immunoglobulin receptor	611	640	A.VADTRDQADGSRASVDSGSSEEQGGSSRAL.V		30	2994.35	749.596	4	87.11	25.47	749.602	4	34.12	x	x
P01833	Polymeric immunoglobulin receptor	611	643	A.VADTRDQADGSRASVDSGSSEEQGGSSRALVST.L		33	3281.5	821.383	4	54.25	28.06	821.388	4	35.74	x	x
P01833	Polymeric immunoglobulin receptor	612	639	V.ADTRDQADGSRASVDSGSSEEQGGSSRA.L		28	2782.2	696.557	4	108.14	19.74	696.56	4	36.82	x	x
P01833	Polymeric immunoglobulin receptor	613	639	A.DTRDQADGSRASVDSGSSEEQGGSSRA.L		27	2711.16	678.799	4	93.94	20.01	678.798	4	42.7	x	x
P01833	Polymeric immunoglobulin receptor	614	639	D.TRDQADGSRASVDSGSSEEQGGSSRA.L		26	2596.13	650.041	4	73.17	18.22	650.041	4	34.52	x	x
P01833	Polymeric immunoglobulin receptor	616	638	R.DQADGSRASVDSGSSEEQGGSSR.A		23	2267.95	756.991	3	49.22	18.37	756.997	3	60.09	x	x
P01833	Polymeric immunoglobulin receptor	616	639	R.DQADGSRASVDSGSSEEQGGSSRA.L		24	2338.99	780.671	3	25.14	19.54	780.675	3	51	x	x
P01833	Polymeric immunoglobulin receptor	616	648	R.DQADGSRASVDSGSSEEQGGSSRALVSTLVPLG.L		33	3218.53	805.641	4	56.09	51.02	805.646	4	43.55	x	x
P01833	Polymeric immunoglobulin receptor	619	638	A.DGSRASVDSGSSEEQGGSSR.A		20	1953.83	652.283	3	41.01	15.37	652.287	3	43.6	x
P01833	Polymeric immunoglobulin receptor	619	639	A.DGSRASVDSGSSEEQGGSSRA.L		21	2024.86	675.963	3	71.5	17.3	675.963	3	45.32	x	x
P01833	Polymeric immunoglobulin receptor	626	641	V.DSGSSEEQGGSSRALV.S		16	1564.7	783.356	2	23.82	26.09	783.361	2	55.73	x	x
P01833	Polymeric immunoglobulin receptor	626	643	V.DSGSSEEQGGSSRALVST.L		18	1752.78	877.396	2	25.48	26.2	877.398	2	58	x	x
P34741	Syndecan-2	122	138	M.DPAEEDTNVYTEKHSDS.L		17	1935.8	646.273	3	60.15	24.92	646.27	3	46.27	x	x
P34741	Syndecan-2	122	141	M.DPAEEDTNVYTEKHSDSLFK.R		20	2324.04	582.018	4	104.34	36.3	582.023	4	43.17	x	x
P63313	Thymosin beta-10	28	44	N.TLPTKETIEQEKRSEIS		17	1988.04	498.018	4	81.28	29.69	663.692	3	37.52	x	x
P63313	Thymosin beta-10	29	44	T.LPTKETIEQEKRSEIS		16	1886.99	472.755	4	76.89	28.51	630.008	3	36.17	x	x
P63313	Thymosin beta-10	30	44	L.PTKETIEQEKRSEIS		15	1773.91	592.311	3	47.88	29.74	592.312	3	38.73	x	x
P55327	Tumor protein D52	213	224	T.TEPLPEKTQESL		12	1370.69	686.354	2	21.89	32.82	686.358	2	44.35	x	x
Q6UXA7	Uncharacterized protein C6orf15	27	68	A.RSIGVVEEKVSQNLGTNLPQLGQPSSTGPSNSEHPQPALDPR.S		42	4420.24	885.058	5	29.41	47.62	885.058	5	40.11		x
P47989	Xanthine dehydrogenase/oxidase	783	790	G.VPANRIVV.R		8	866.534	434.274	2	20.72	30.51	434.275	2	27.49	x
*Start and End position as given by the PEAKS output (including the signal peptides of proteins)
